# Supplementary material for: MLL3 regulates the CDKN2A tumor suppressor locus in liver cancer
Source: eLife journal article supplement (doi:10.7554/elife.80854), 2023-06-01

**Figure 1—figure supplement 2B Source files**

*Kmt2c* locus  
amplicon

*Trp53* locus  
amplicon

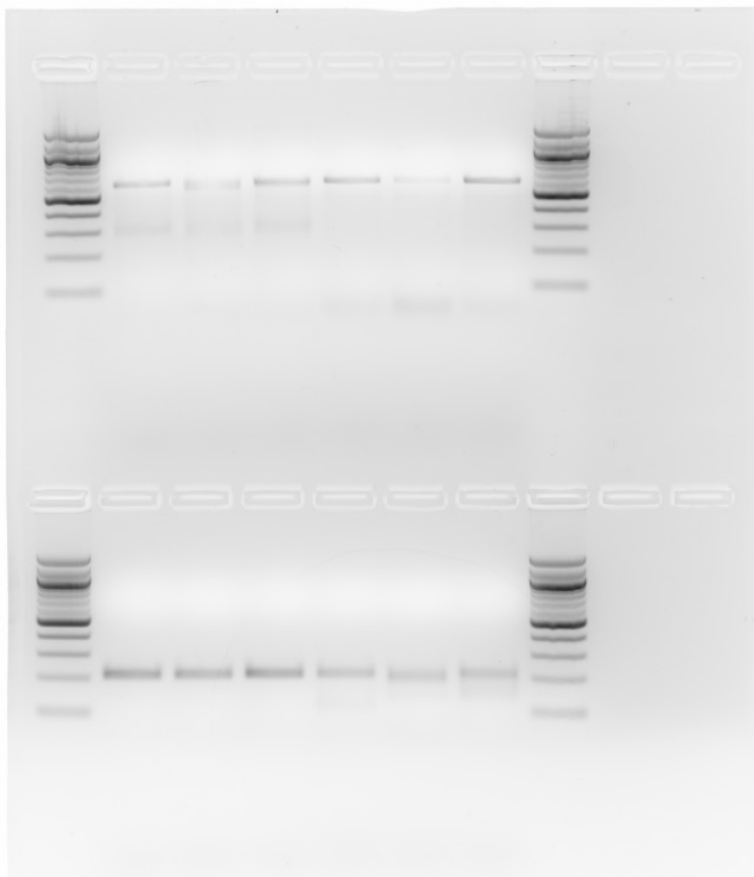

Supplement: supp [file elife-80854-supp-v1.zip]
