# Supplementary material for: MLL3 regulates the CDKN2A tumor suppressor locus in liver cancer
Source: eLife journal article supplement (doi:10.7554/elife.80854), 2023-06-01

**Figure 4—figure supplement 1A Source files**

p19<sup>Arf</sup>

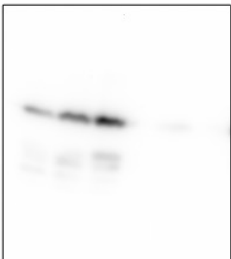

p16<sup>Ink4a</sup>

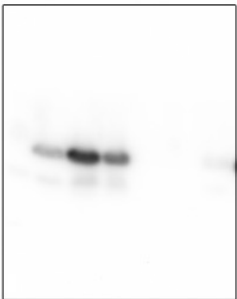

Actin

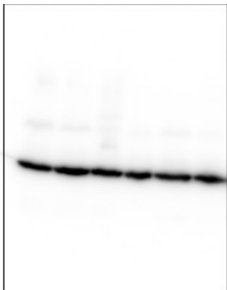

**Figure 4—figure supplement 1C Source files**

p19<sup>Arf</sup>

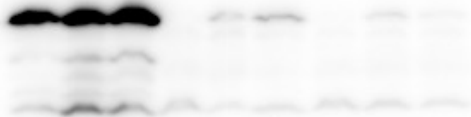

p16<sup>Ink4a</sup>

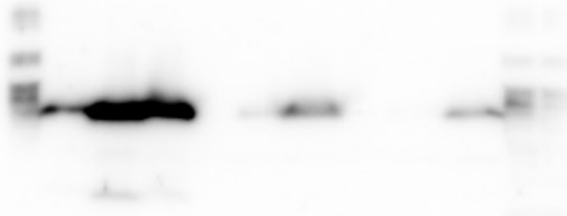

Actin

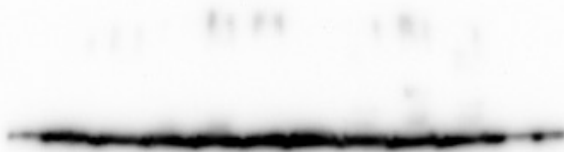

**Figure 4—figure supplement 1D Source files**

p19<sup>Arf</sup>

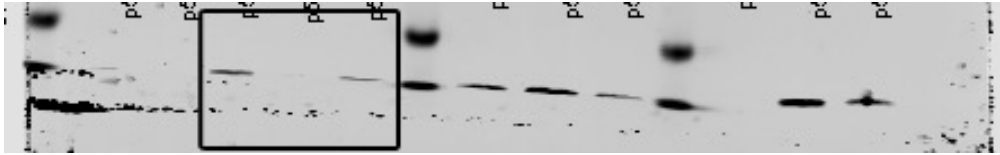

Actin

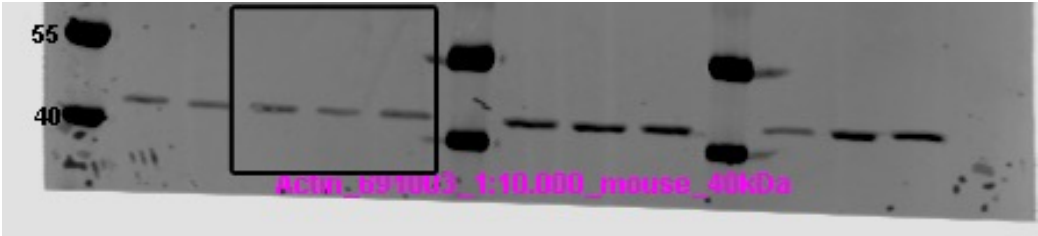

**Figure 4—figure supplement 1E Source files**

Axin1

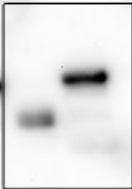

Actin

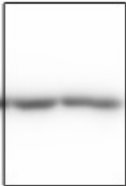

Supplement: supp [file elife-80854-supp-v1.zip]
