# Supplementary material for: MLL3 regulates the CDKN2A tumor suppressor locus in liver cancer
Source: eLife journal article supplement (doi:10.7554/elife.80854), 2023-06-01
Supplement: supp [file elife-80854-supp-v1.zip]

## Supplementary File 1

### sgRNA sequences

|                               |                      |
|-------------------------------|----------------------|
| sg <i>Trp53</i> (mouse)       | ACCCTGTCACCGAGACCCC  |
| sg <i>Kmt2c.1</i> (mouse)     | AATCAGTGCCAACCAATGGC |
| sg <i>Kmt2c.2</i> (mouse)     | CAGGTTGAAGACAAAAAGTA |
| sg <i>Chrom8</i> (mouse)      | ACATTTCTTTCCCACTGG   |
| sgGFP                         | GAATAGCTCAGAGGCCGAGG |
| sgKMT2C.1 (Human, for CRISPR) | CCCGCGCGTCAGGCCCGTC  |
| sgKMT2C.2 (Human, for CRISPR) | CAGGCCCGTCAGGCCCGGG  |

### shRNA sequences

|                           |                       |
|---------------------------|-----------------------|
| sh <i>Renilla</i>         | AGGAATTATAATGCTTATCT  |
| sh <i>Kmt2c.1</i> (mouse) | GGAGACAAATATGTAGAGTT  |
| sh <i>Kmt2c.2</i> (mouse) | ACCAGTGATCACTTTACTAA  |
| sh <i>Cdkn2a</i> (mouse)  | AACACAAAGAGCACCCAGCGG |

### qPCR primers sequences

|                                              |                        |
|----------------------------------------------|------------------------|
| <i>Actb</i> (mouse)-Forward                  | GGCTGTATTCCCCTCCATCG   |
| <i>Actb</i> (mouse)-Reverse                  | CCAGTTGGTAACAATGCCATGT |
| <i>Cdkn2a</i> - <i>Ink4a</i> (mouse)-Forward | CCATCTGGAGCAGCATGGAGT  |
| <i>Cdkn2a</i> - <i>Ink4a</i> (mouse)-Reverse | ACGTGAACGTTGCCCATCATC  |
| <i>Cdkn2a</i> - <i>Arf</i> (mouse)-Forward   | CGCTTCTCACCTCGCTTGTC   |
| <i>Cdkn2a</i> - <i>Arf</i> (mouse)-Reverse   | CAGTGACCAAGAACCCTGCGA  |
| <i>Kmt2c</i> (mouse)-Forward                 | CAGGAGGGCCTGCAAGATAC   |
| <i>Kmt2c</i> (mouse)-Reverse                 | TATCCTCCGGTTGGAGCTGA   |
| <i>ACTB</i> (Human)-Forward                  | AAGAGCTACGAGCTGCCTGA   |
| <i>ACTB</i> (Human)-Reverse                  | TCCATGCCCAGGAAGGAAGG   |
| <i>CDKN2A</i> - <i>INK4A</i> (Human)-Forward | GAGCAGCATGGAGCCTTCGG   |
| <i>CDKN2A</i> - <i>INK4A</i> (Human)-Reverse | TGGATCGGCCTCCGACCGTAA  |
| <i>CDKN2A</i> - <i>ARF</i> (Human)-Forward   | GCAGGTTCTTGGTGACCCTC   |
| <i>CDKN2A</i> - <i>ARF</i> (Human)-Reverse   | TAGACGCTGGCTCCTCAGT    |
| <i>KMT2C</i> (Human)-Forward                 | GAAACGCTGTAGCCTGTCCT   |
| <i>KMT2C</i> (Human)-Reverse                 | CCCTGAGTCTCCTTTGGCAG   |
| <i>KMT2D</i> (Human)-Forward                 | GCCCTTTCTTCAAGGTGGACT  |
| <i>KMT2D</i> (Human)-Reverse                 | CGGGTTCCGGGCTAAAGAAG   |
| <i>TP53</i> (Human)-Forward                  | TGACACGCTTCCCTGGATTG   |
| <i>TP53</i> (Human)-Reverse                  | TCATCCATTGCTTGGGACGG   |

### ChIP-qPCR primers sequences

|                                                   |                          |
|---------------------------------------------------|--------------------------|
| <i>Cdkn2a</i> -Ink4a promoter (mouse)-<br>Forward | GATGGAGCCCGGACTACAGAAG   |
| <i>Cdkn2a</i> -Ink4a promoter (mouse)-<br>Reverse | CTGTTTCAACGCCAGCTCTC     |
| <i>Cdkn2a</i> -Arf promoter (mouse)-Forward       | GACCGTGAAGCCGACCCCTTCAGC |
| <i>Cdkn2a</i> -Arf promoter (mouse)-Reverse       | GGGGTCGCTTCCCTTCGG       |
