# Supplementary material for: MLL3 regulates the CDKN2A tumor suppressor locus in liver cancer
Source: eLife journal article supplement (doi:10.7554/elife.80854), 2023-06-01

# Figure 5—figure supplement 2B Source files

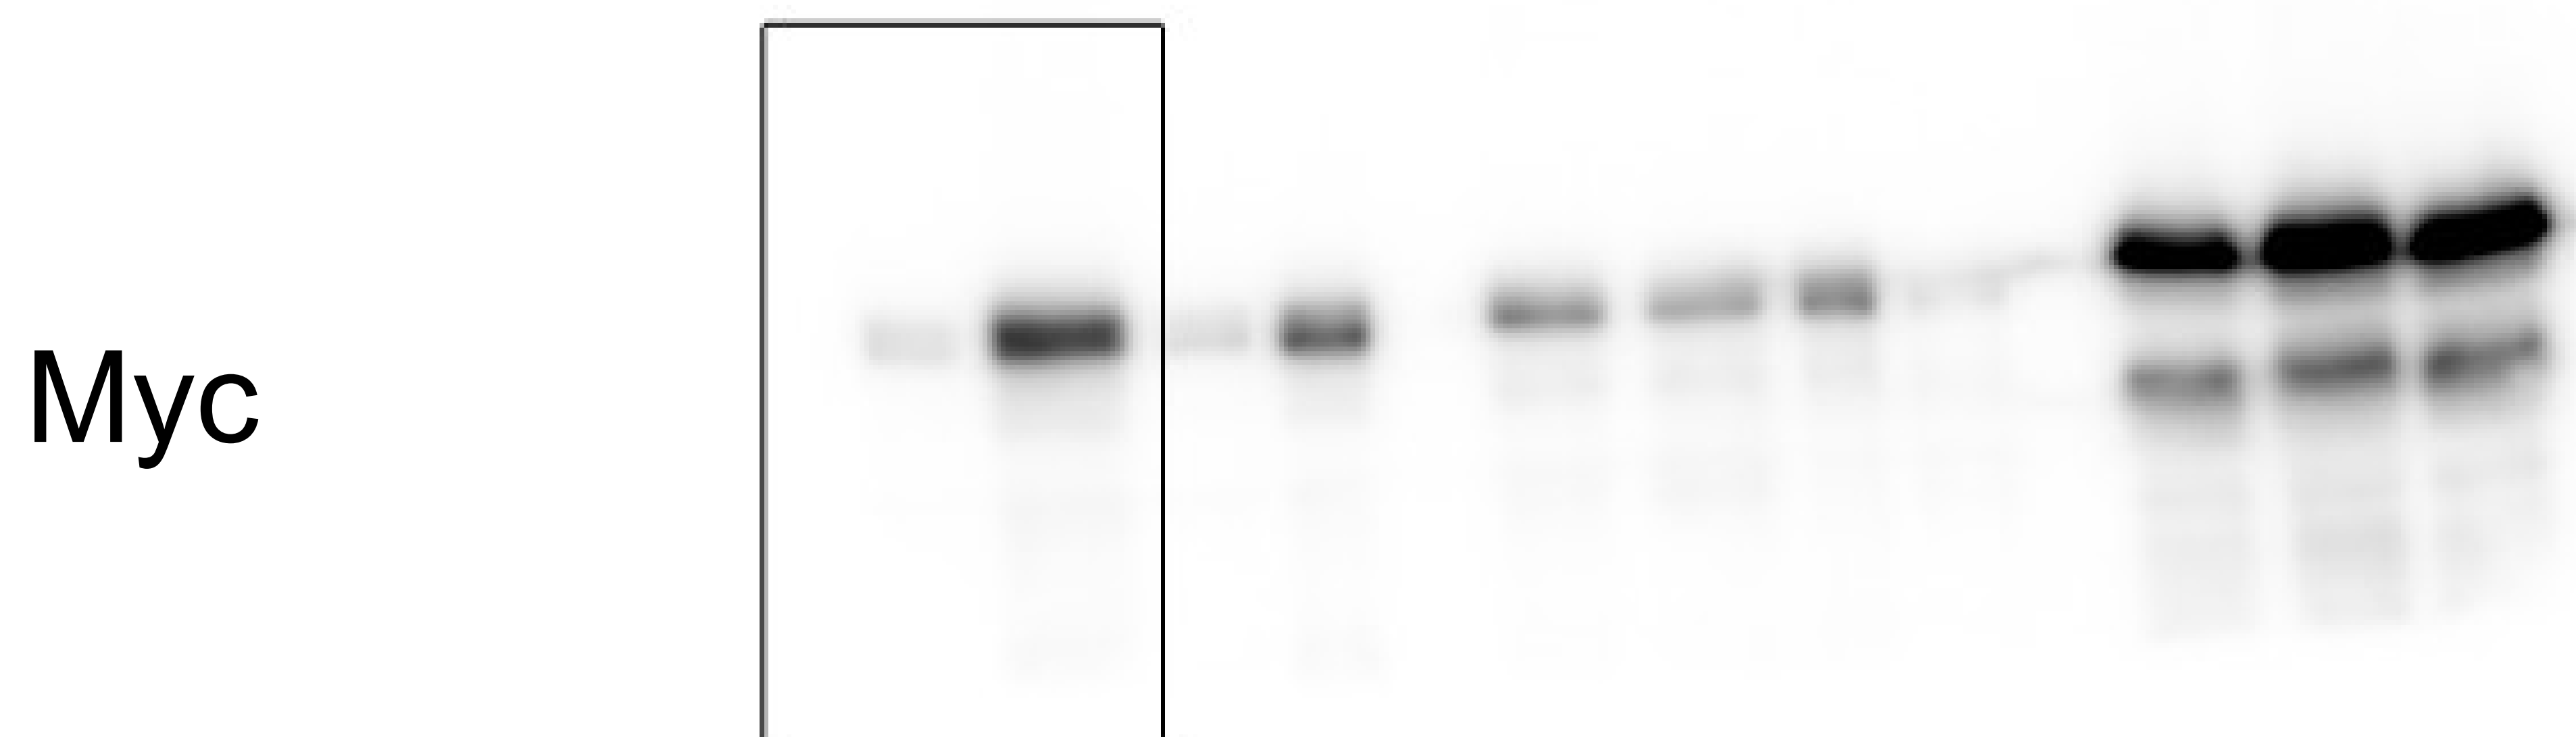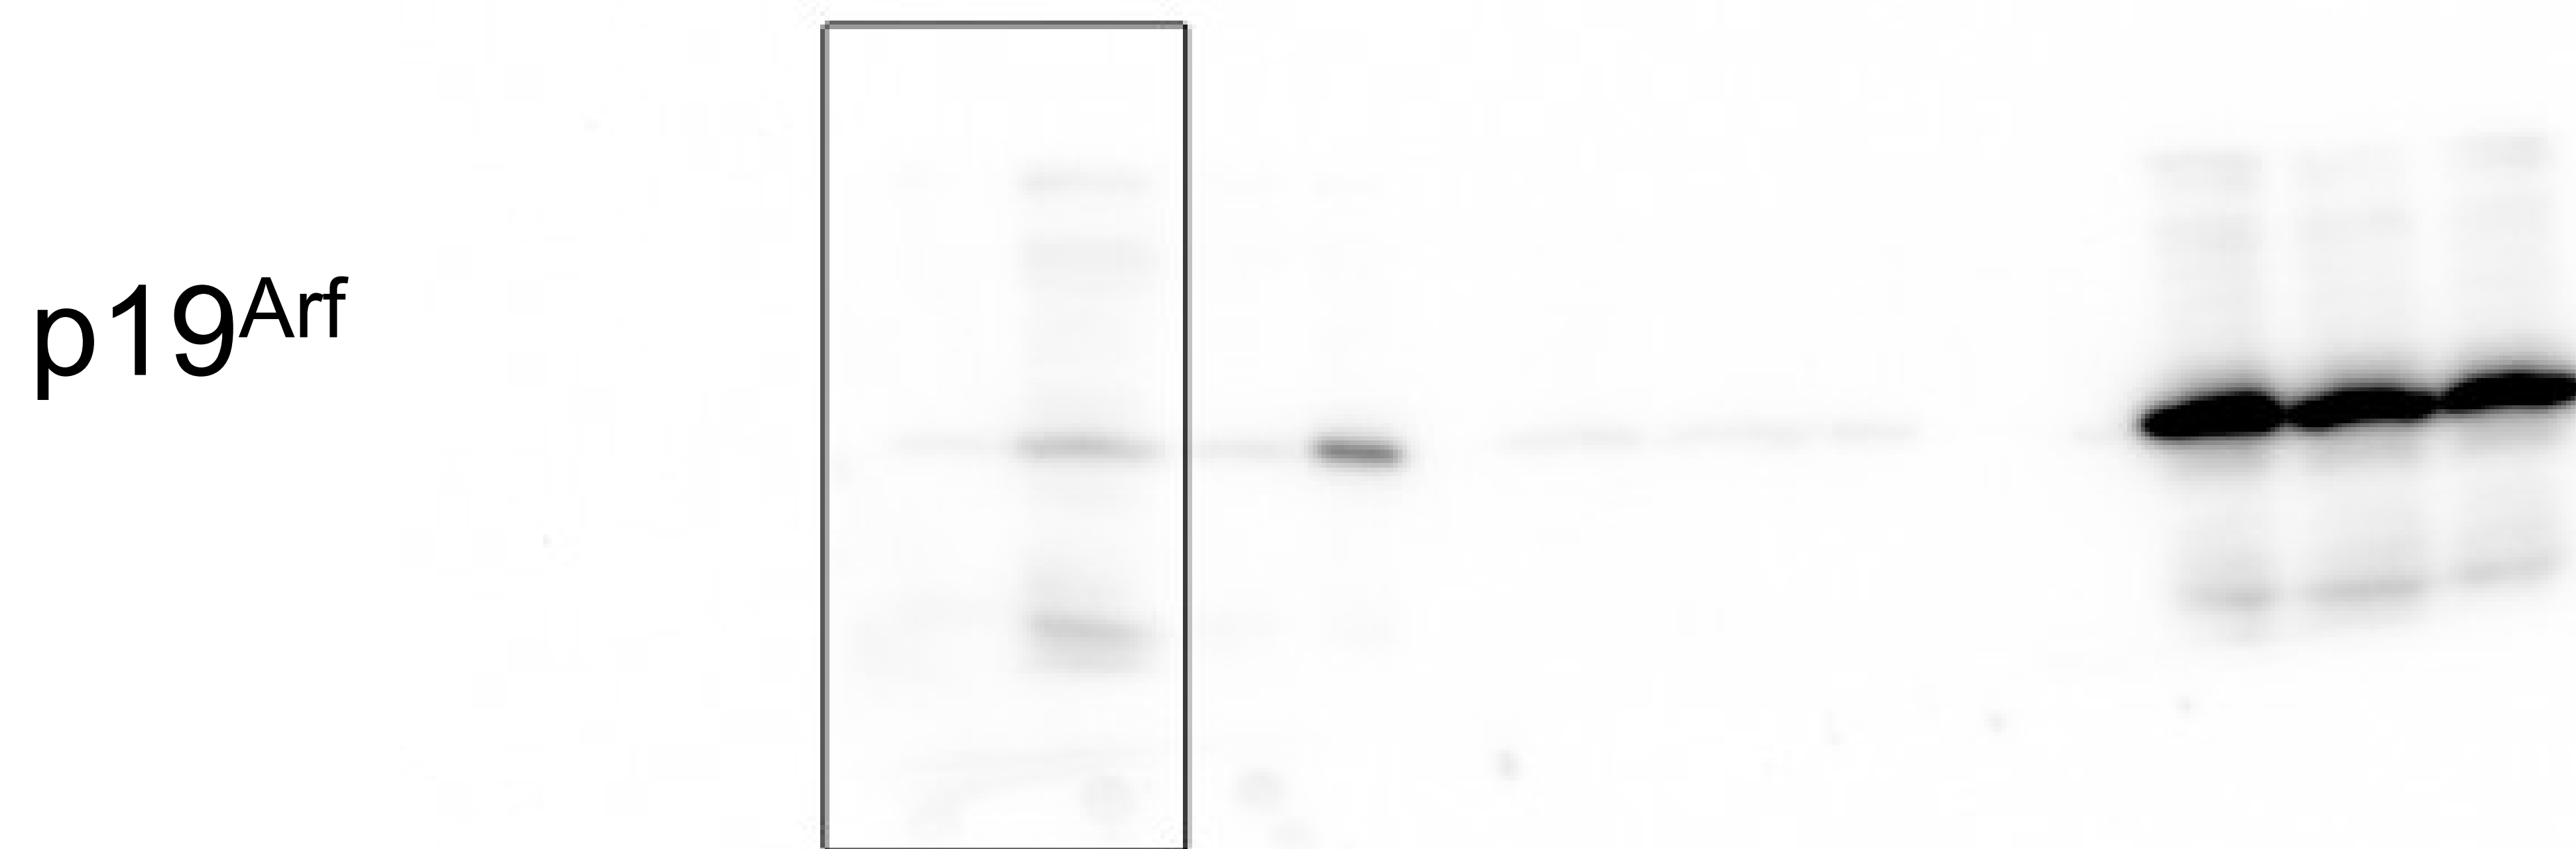

**Figure 5—figure supplement 2B Source files**

p16<sup>Ink4a</sup>

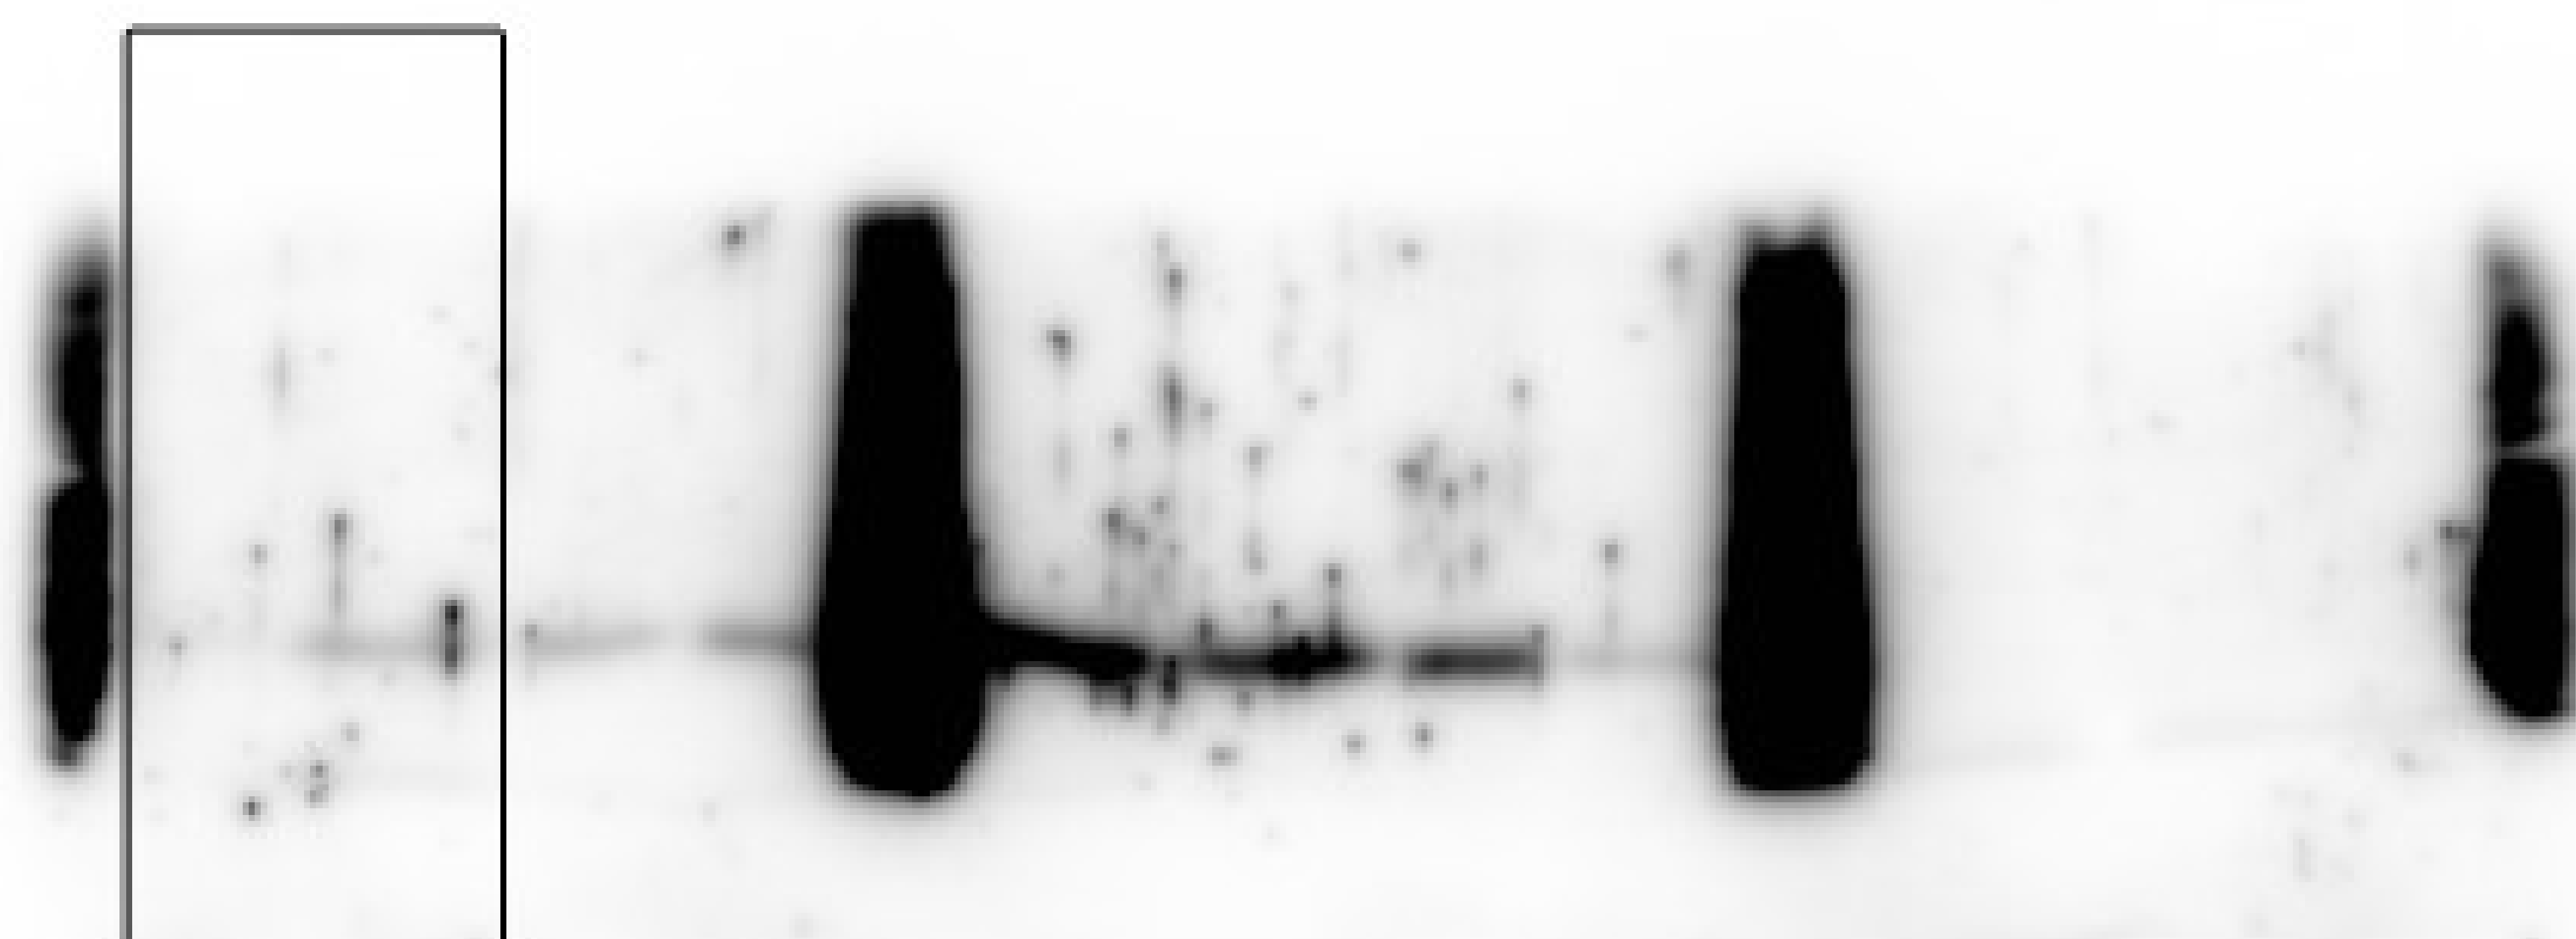

Actin

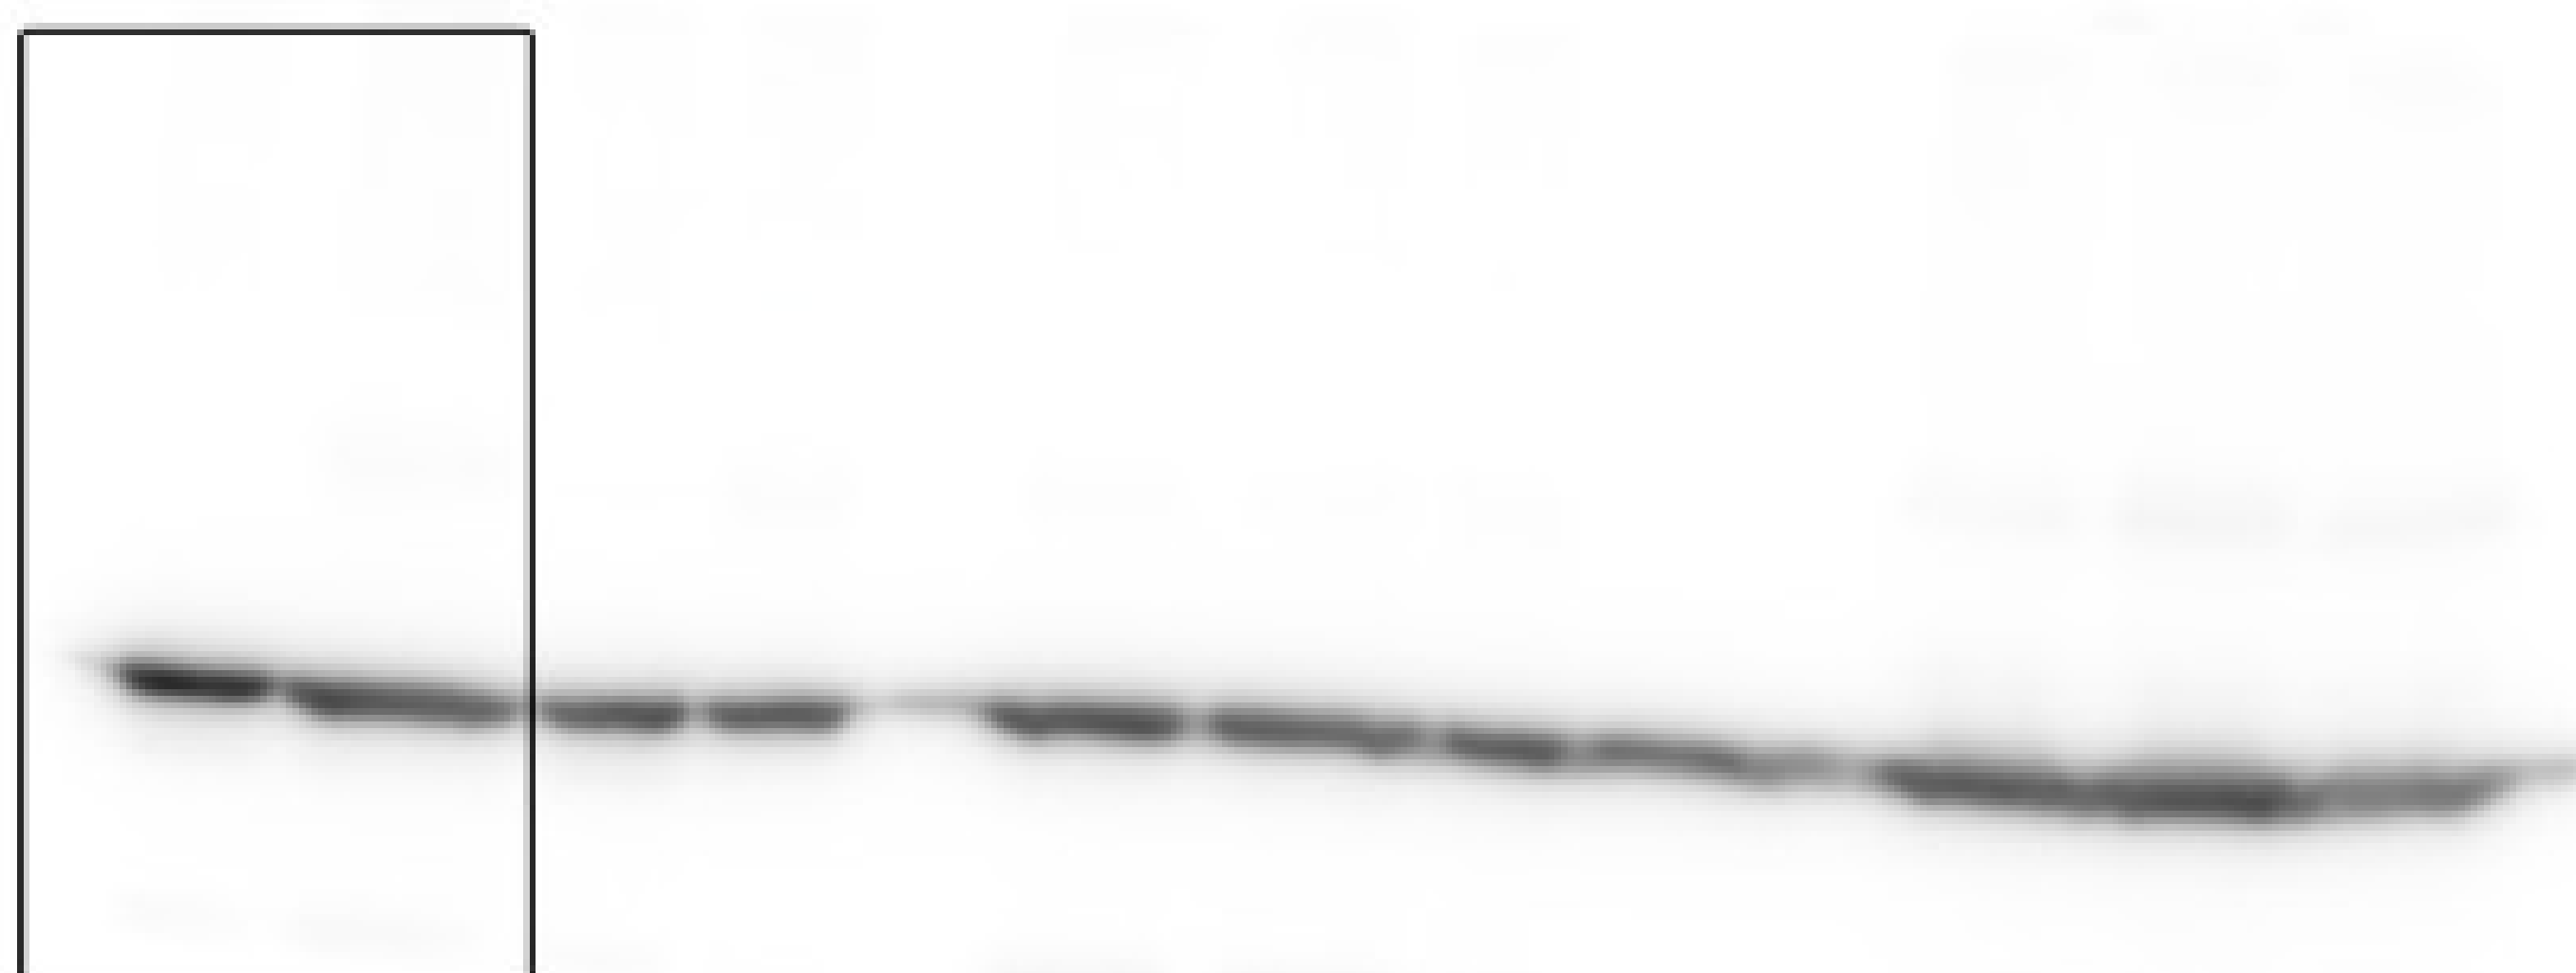

Figure 5—figure supplement 2F Source files – left panel

p19<sup>Arf</sup>

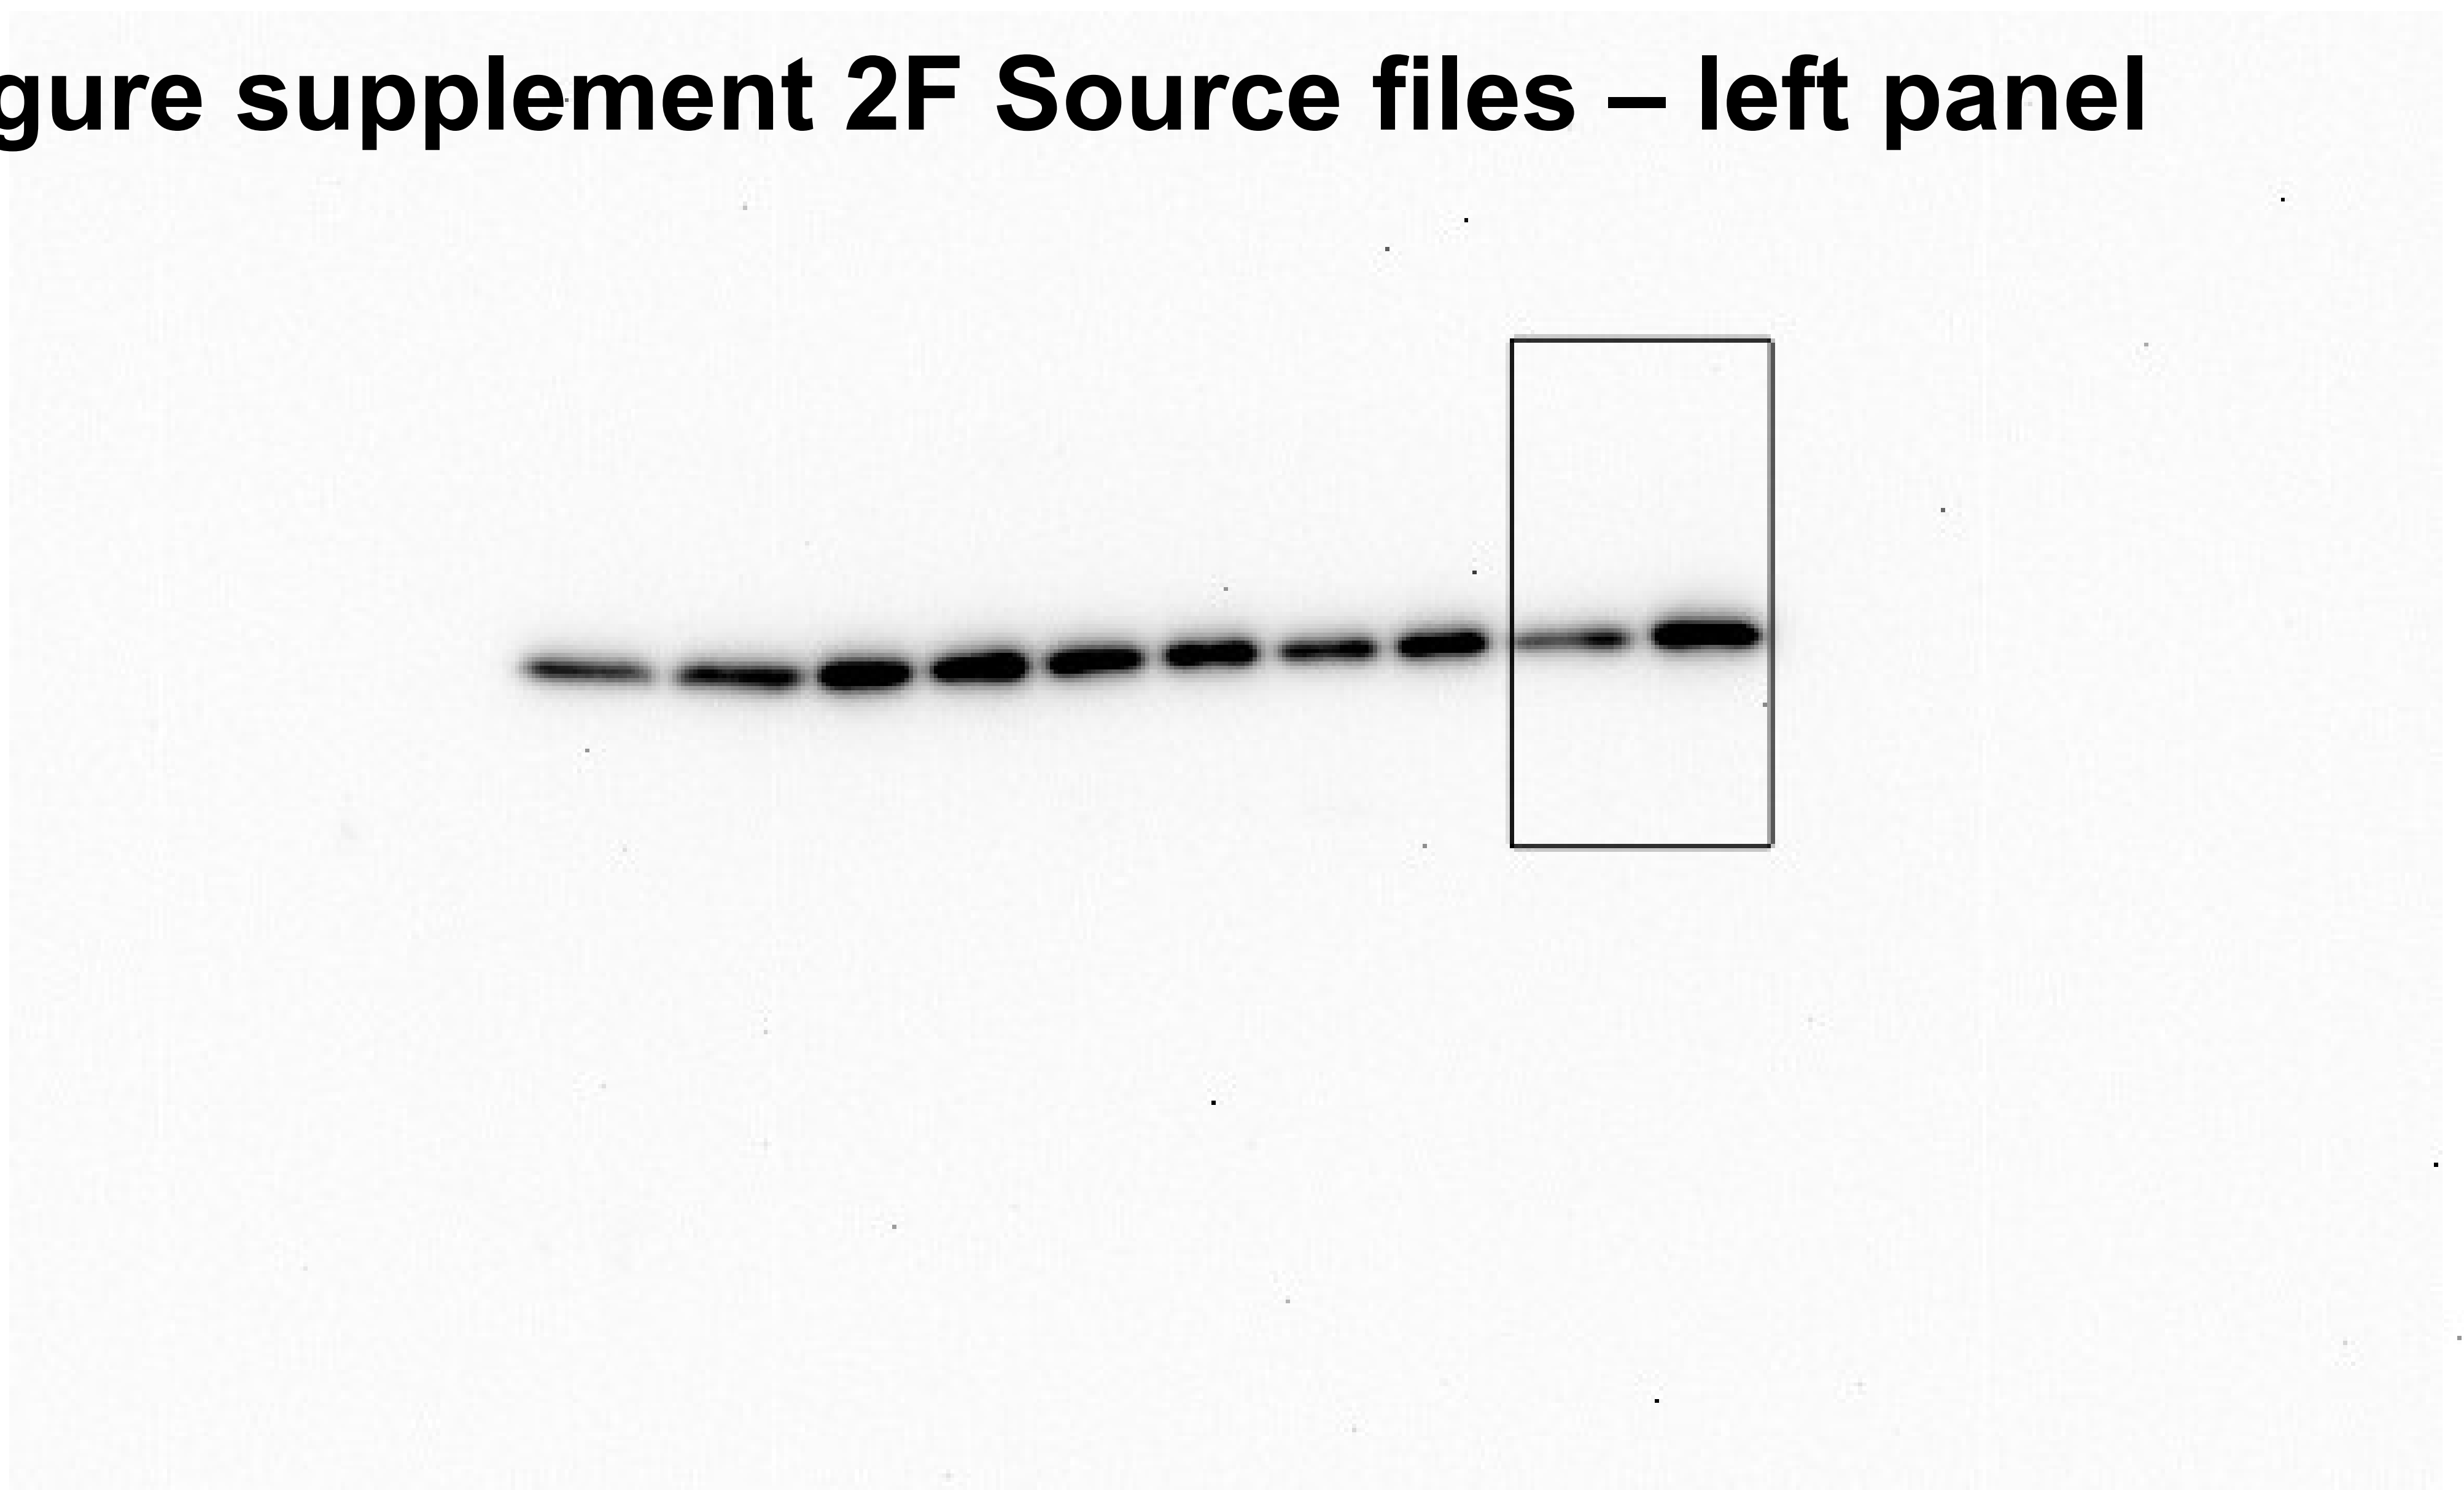

p16<sup>Ink4a</sup>

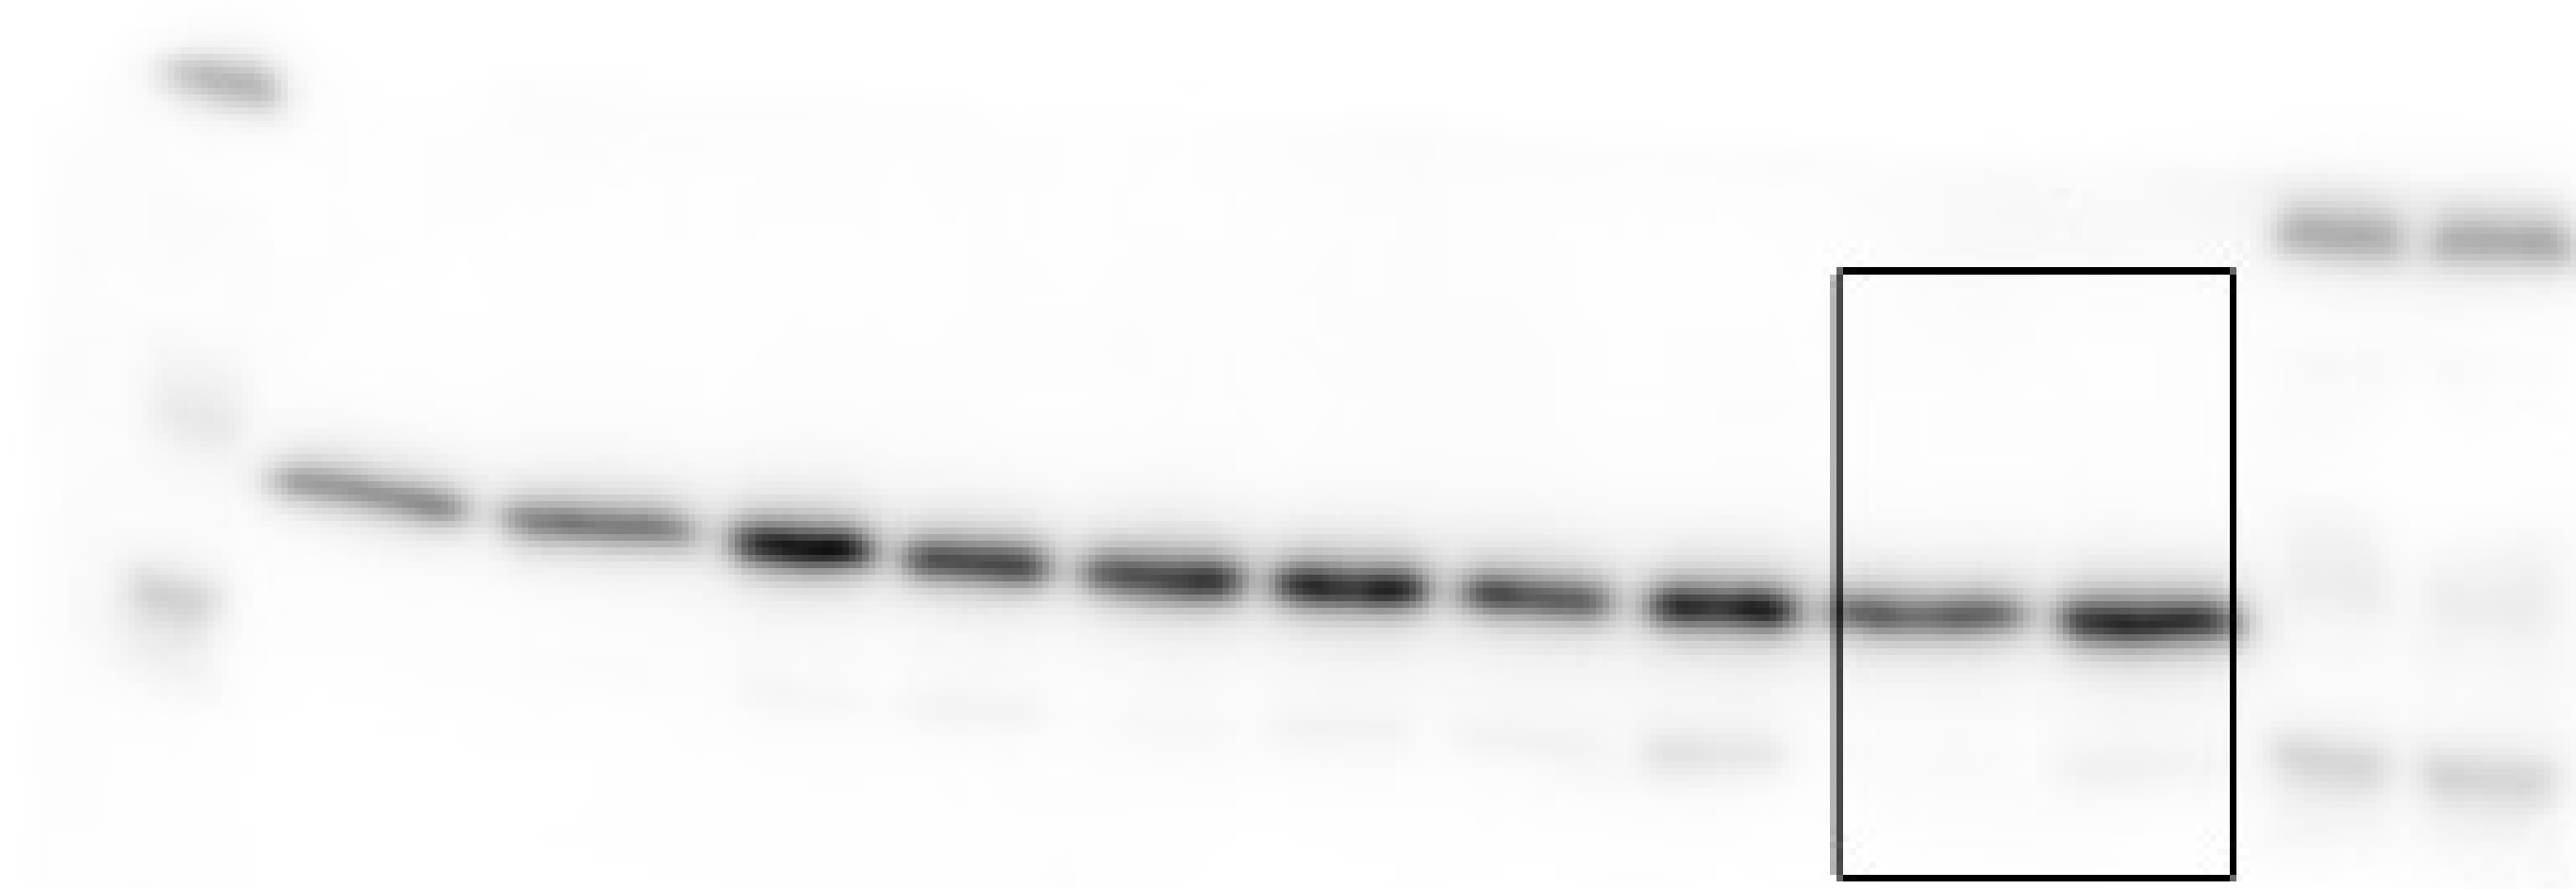

Actin

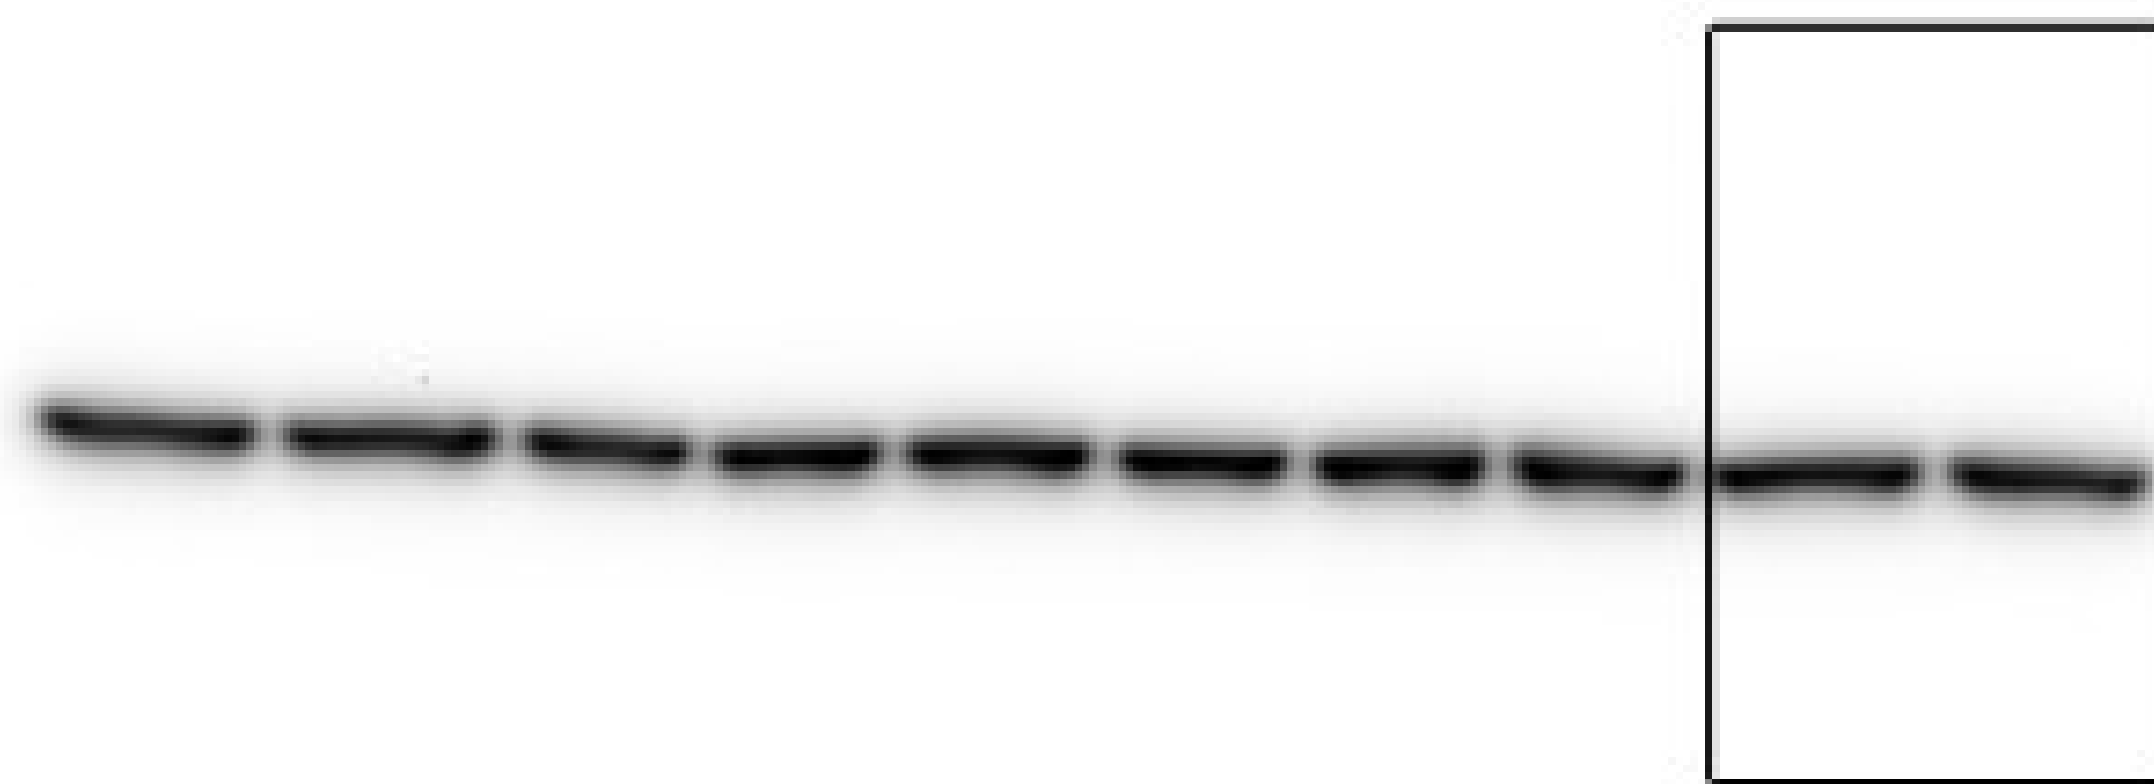

Figure 5—figure supplement 2F Source files – right panel

p19<sup>Arf</sup>

p16<sup>Ink4a</sup>

Actin

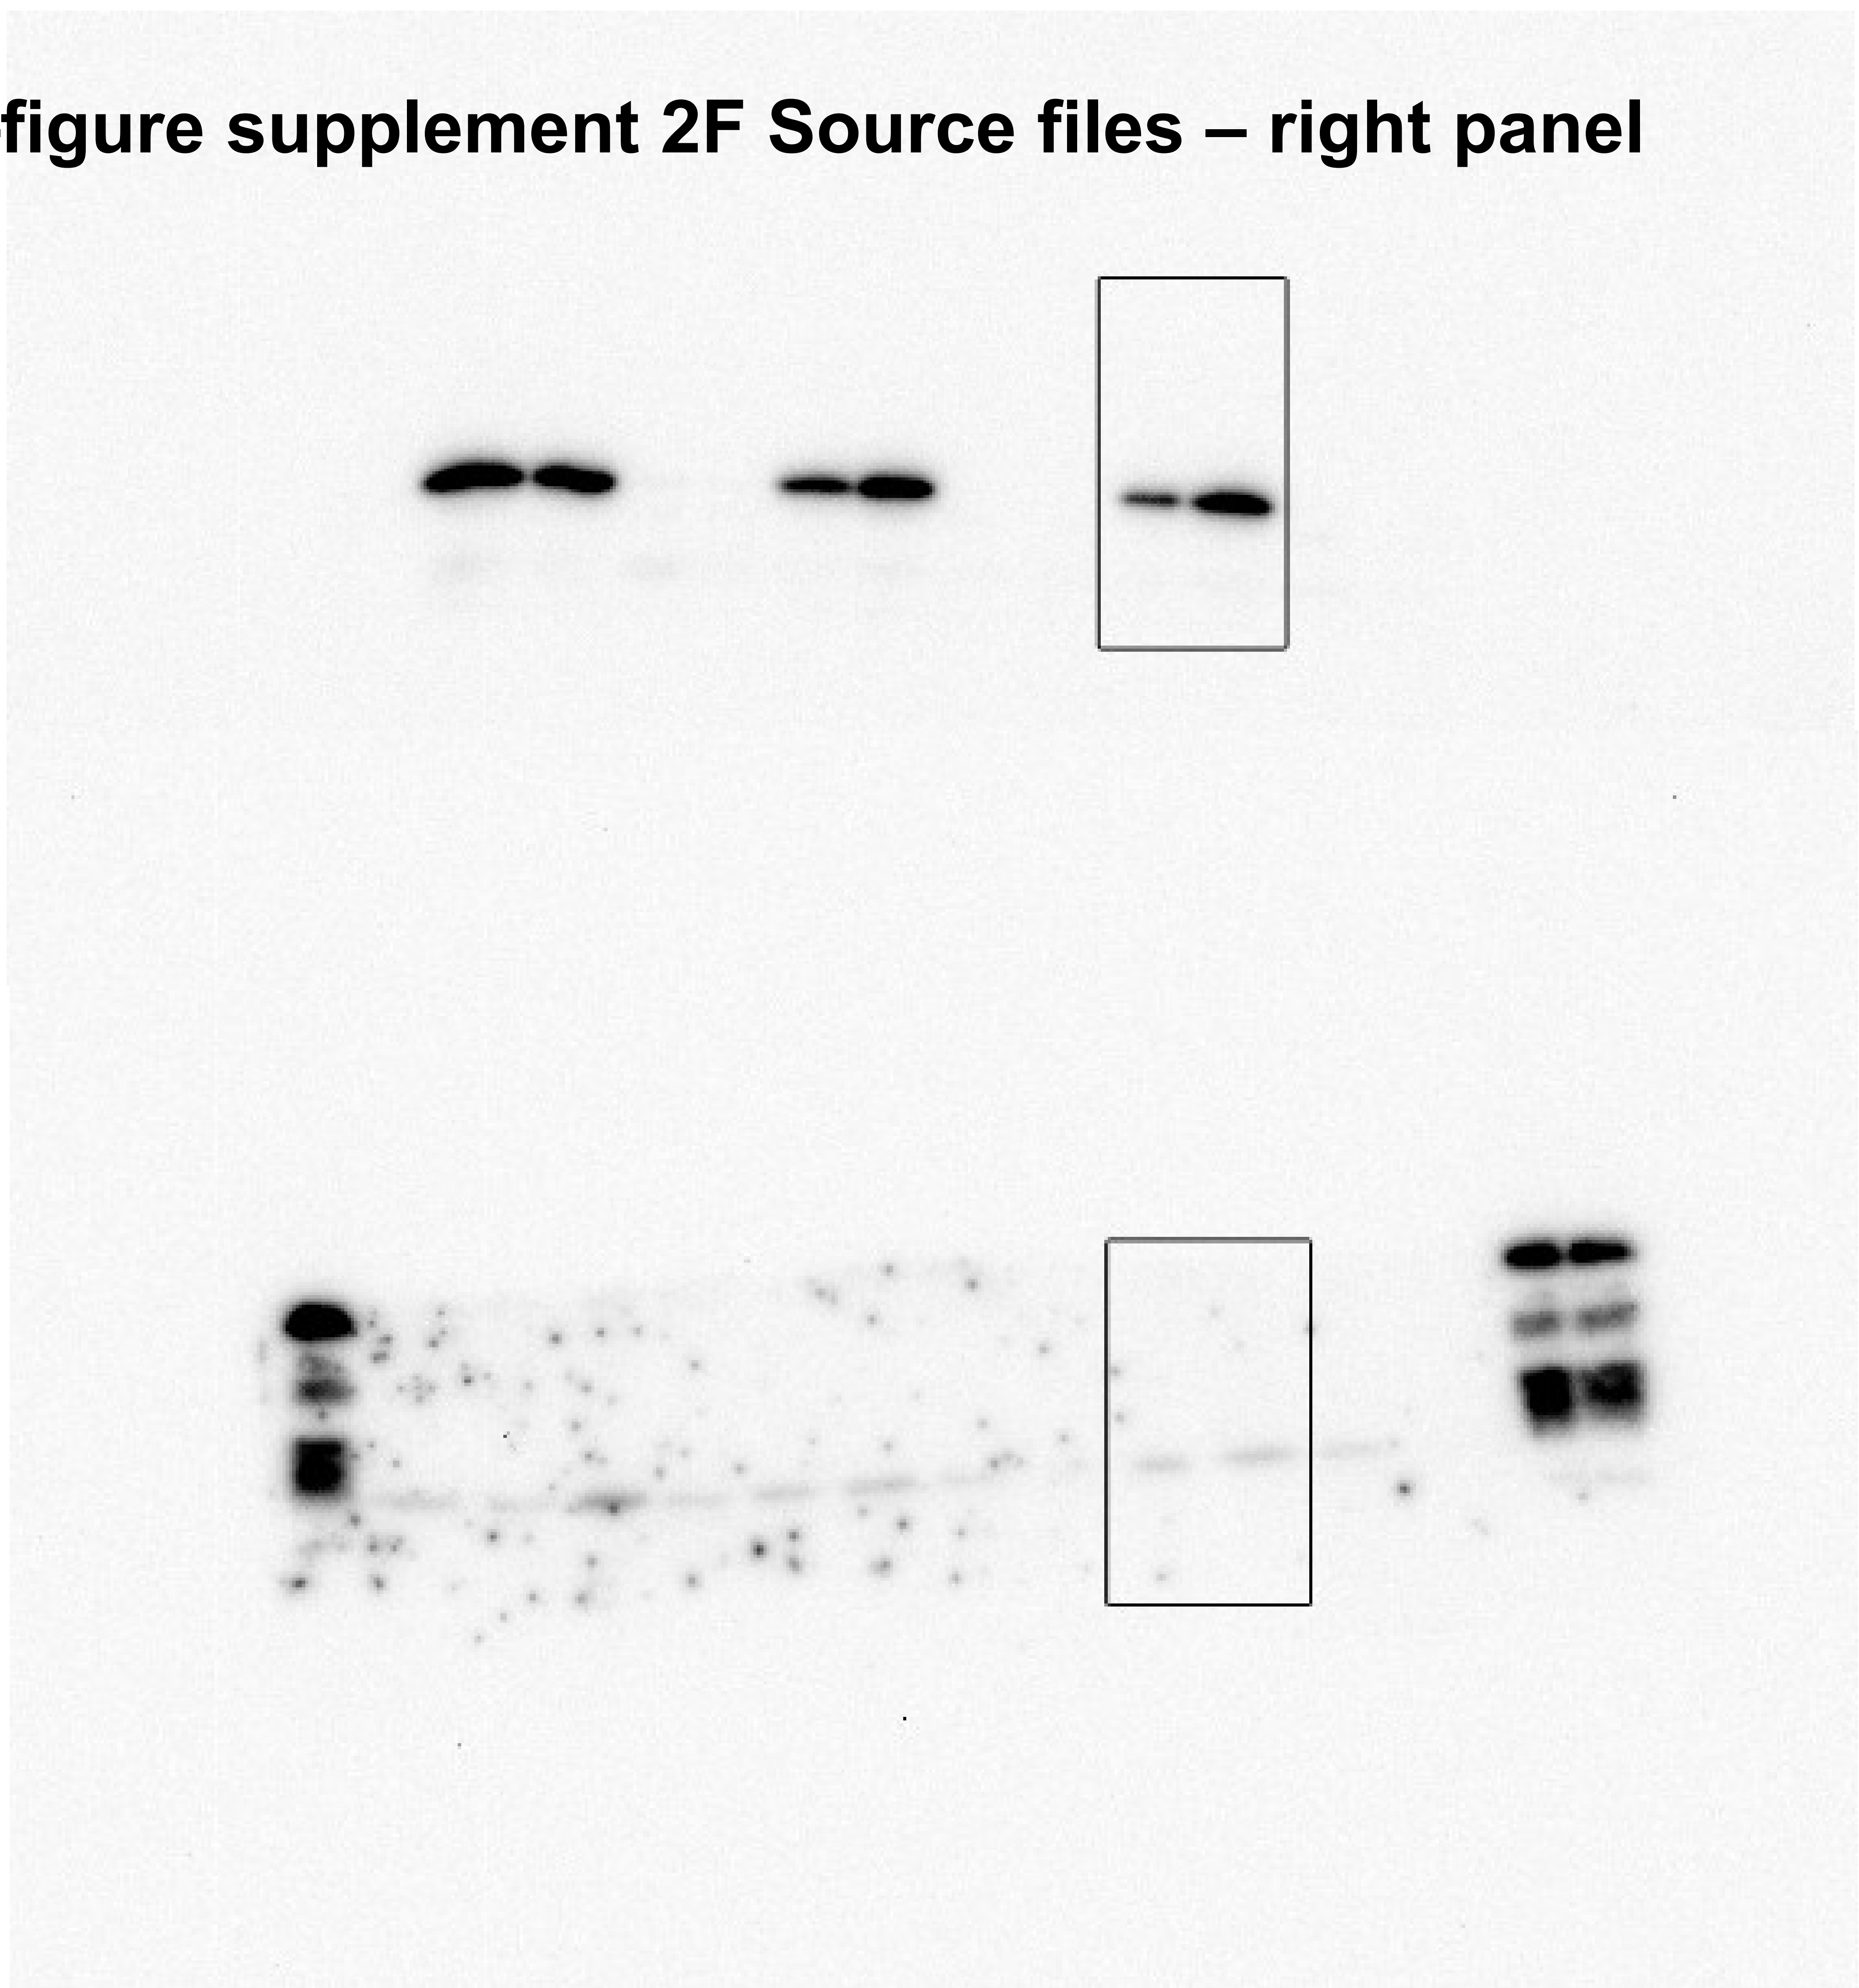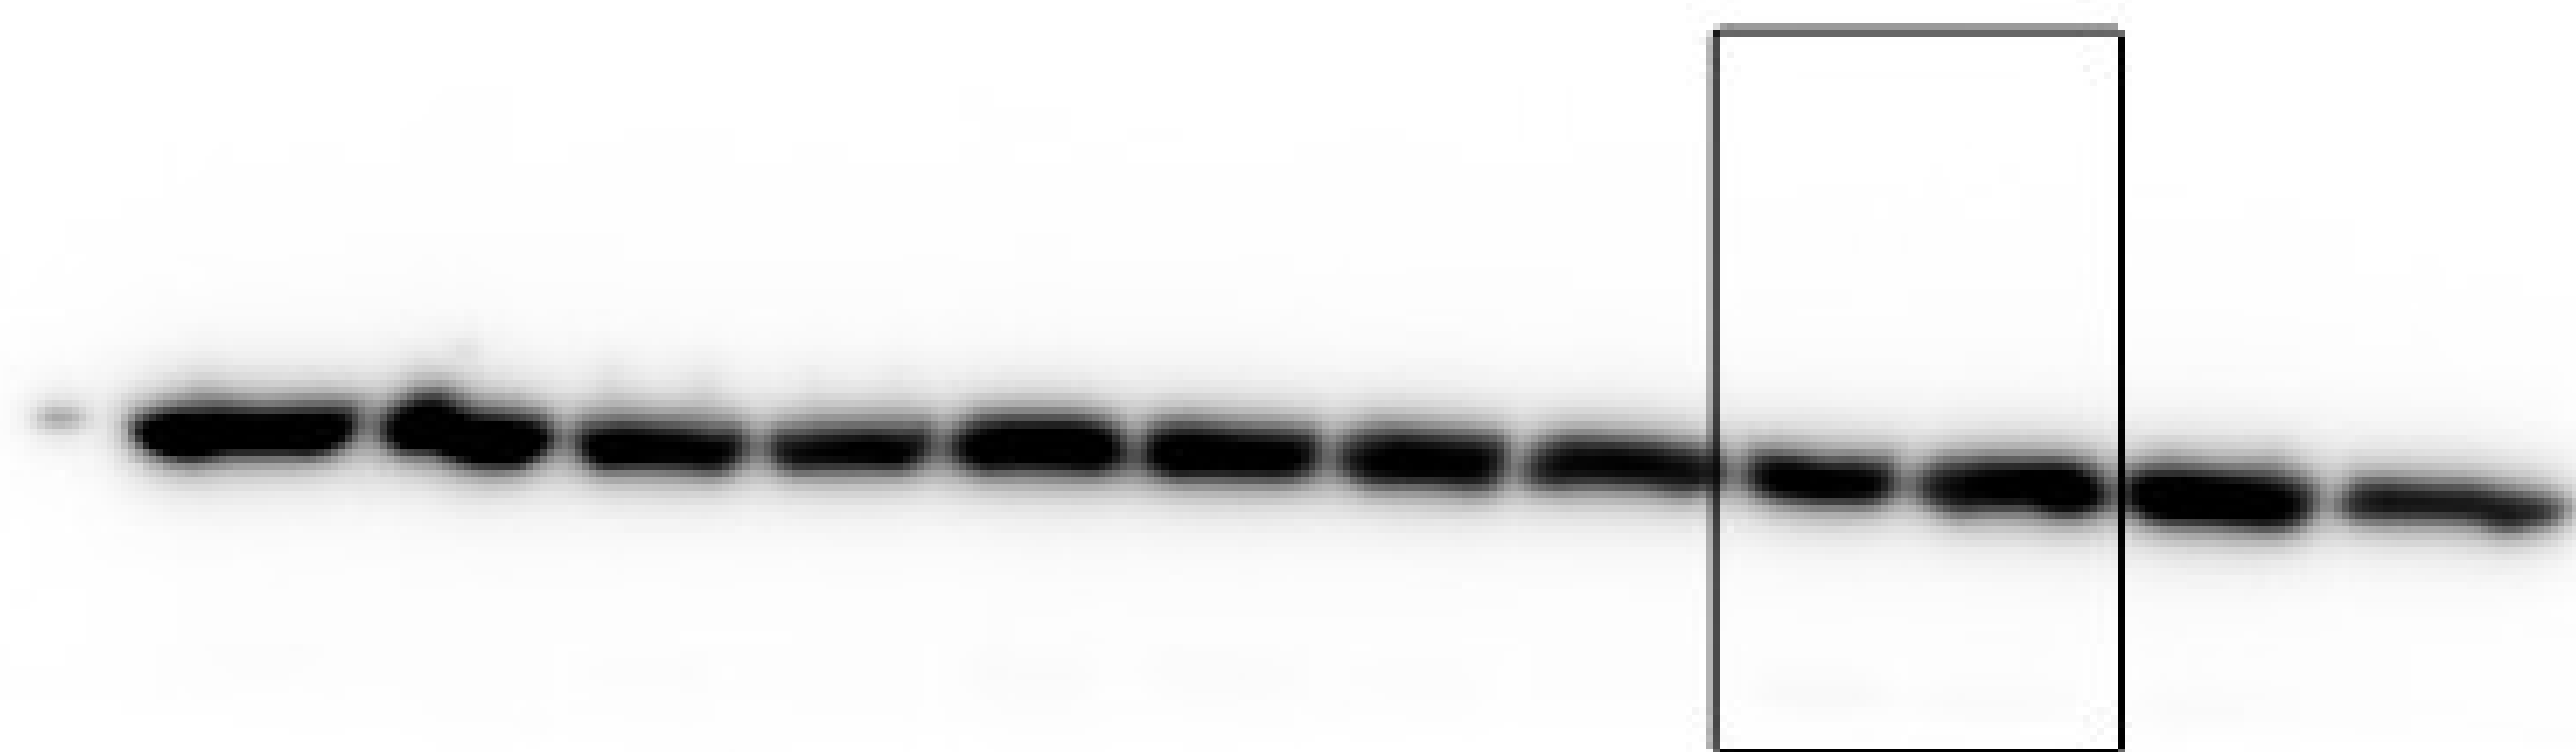

**Figure 5—figure supplement 2G Source files**

p19<sup>Arf</sup>

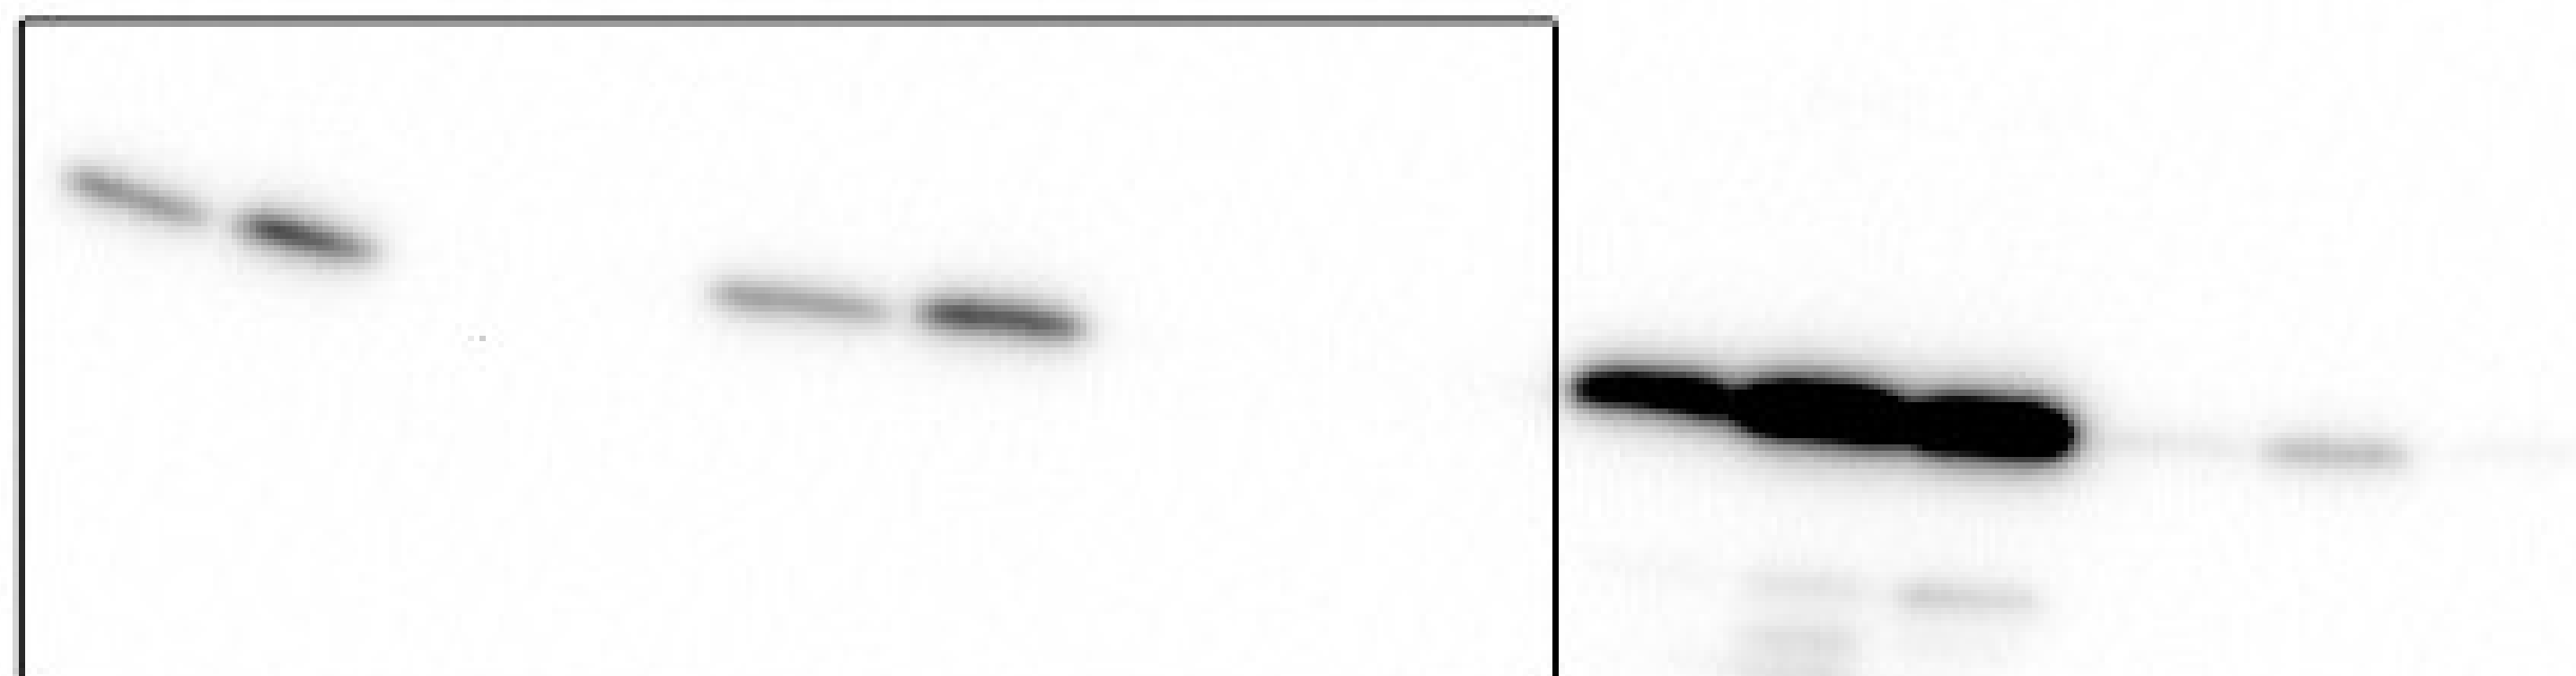

p16<sup>Ink4a</sup>

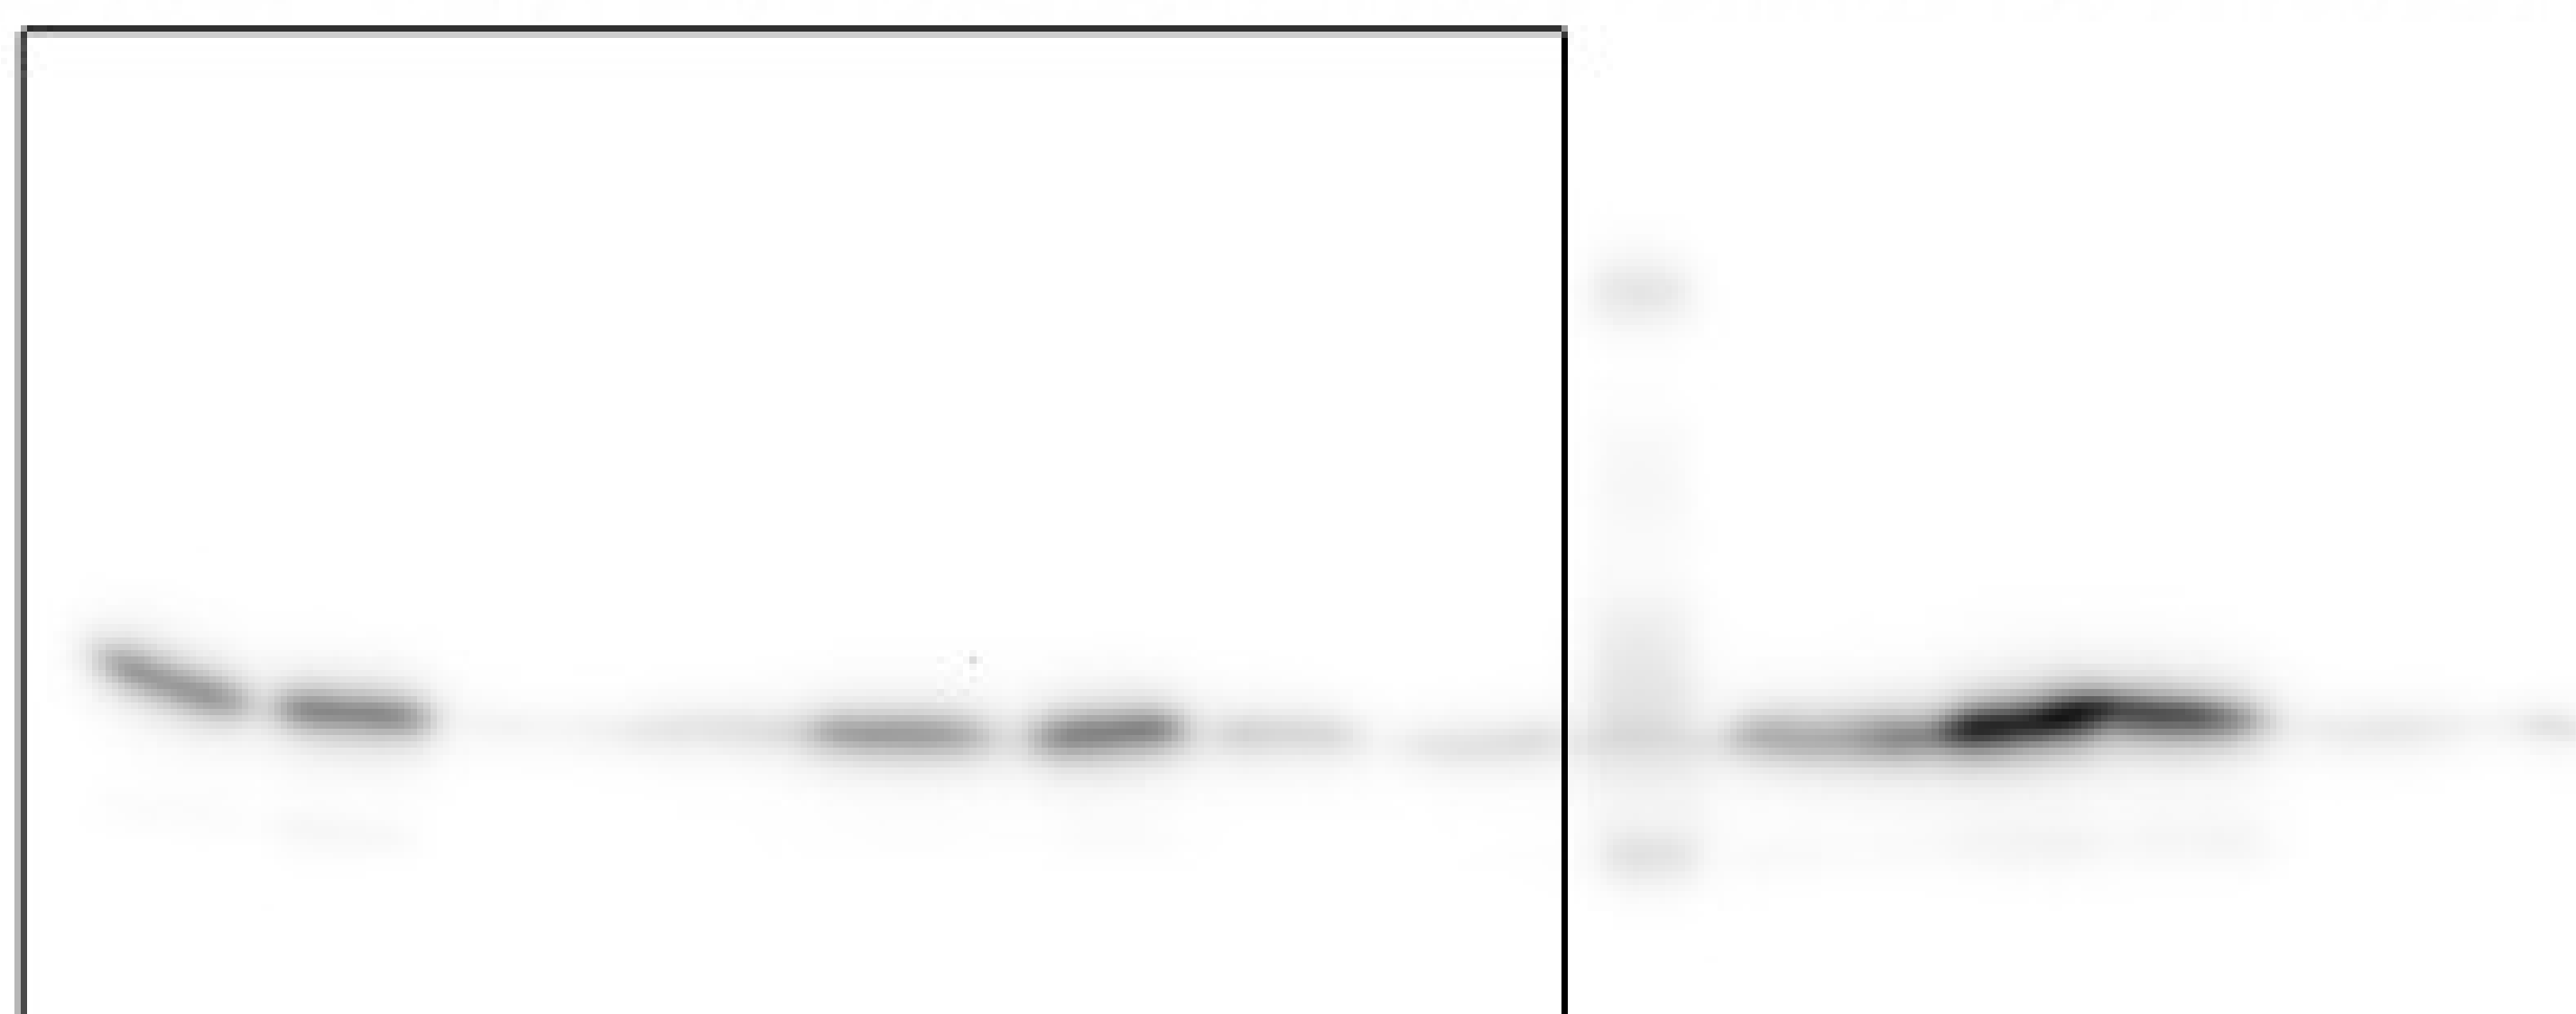

Actin

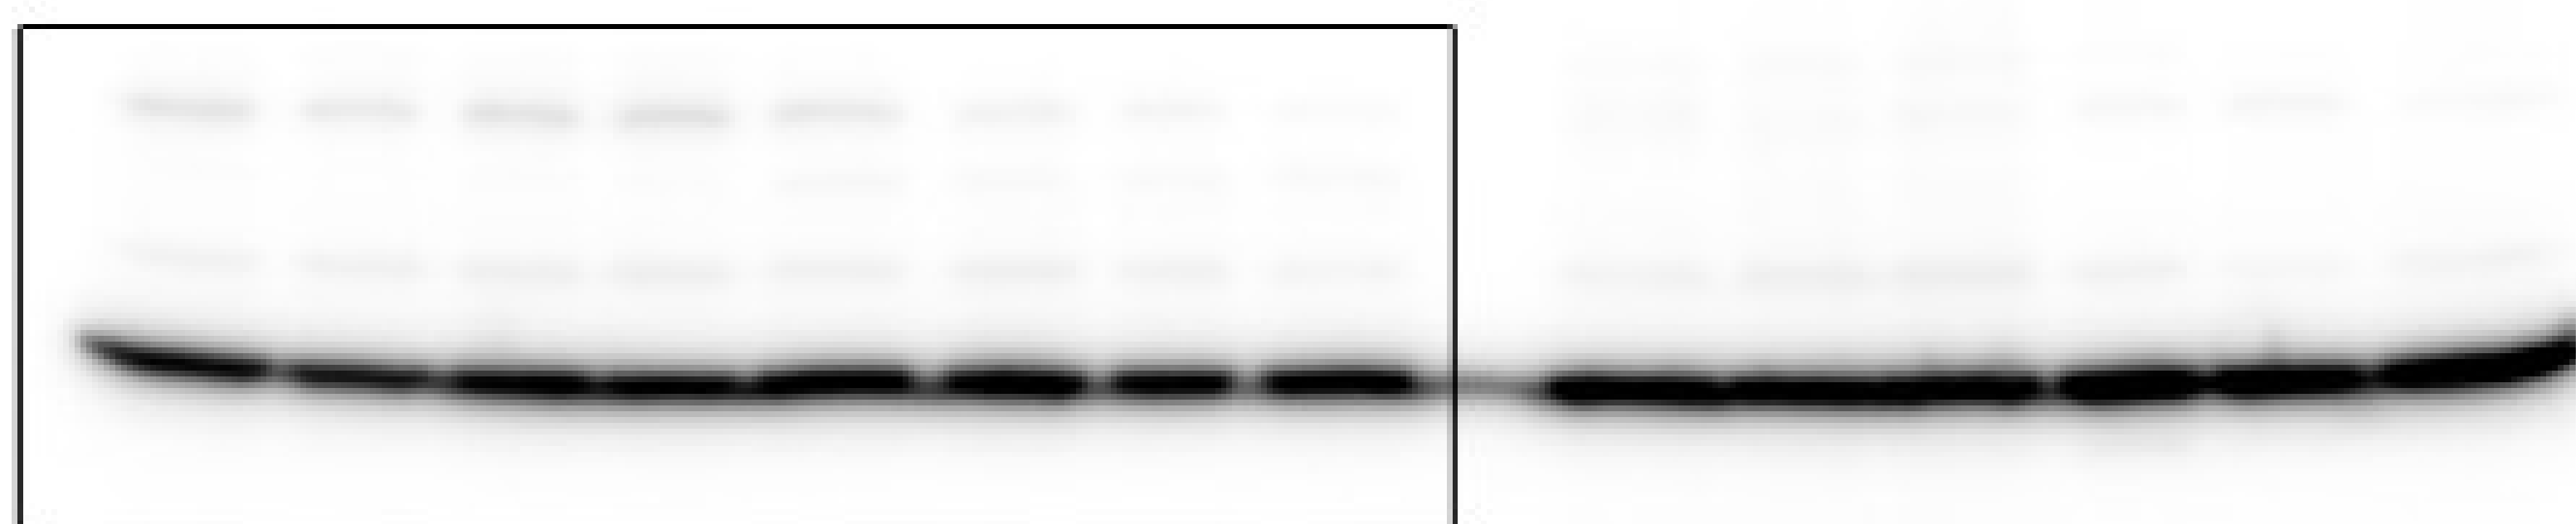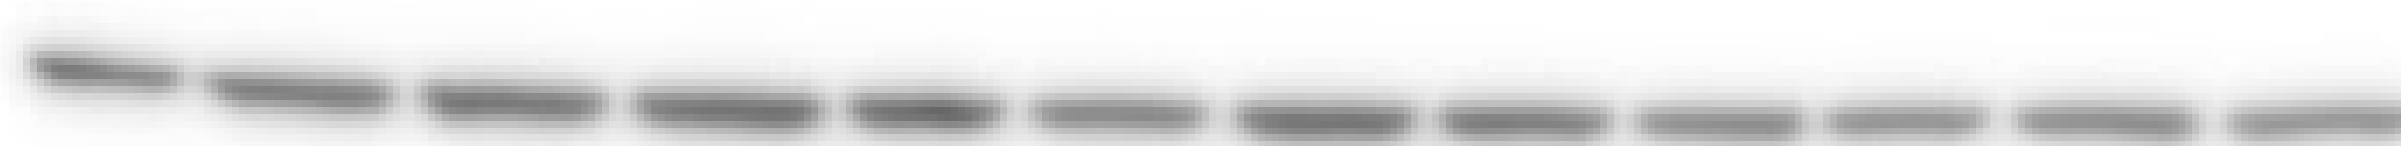

Supplement: supp [file elife-80854-supp-v1.zip]
