# Supplementary figures and images for: MLL3 regulates the CDKN2A tumor suppressor locus in liver cancer
Source: eLife journal article supplement (doi:10.7554/elife.80854), 2023-06-01

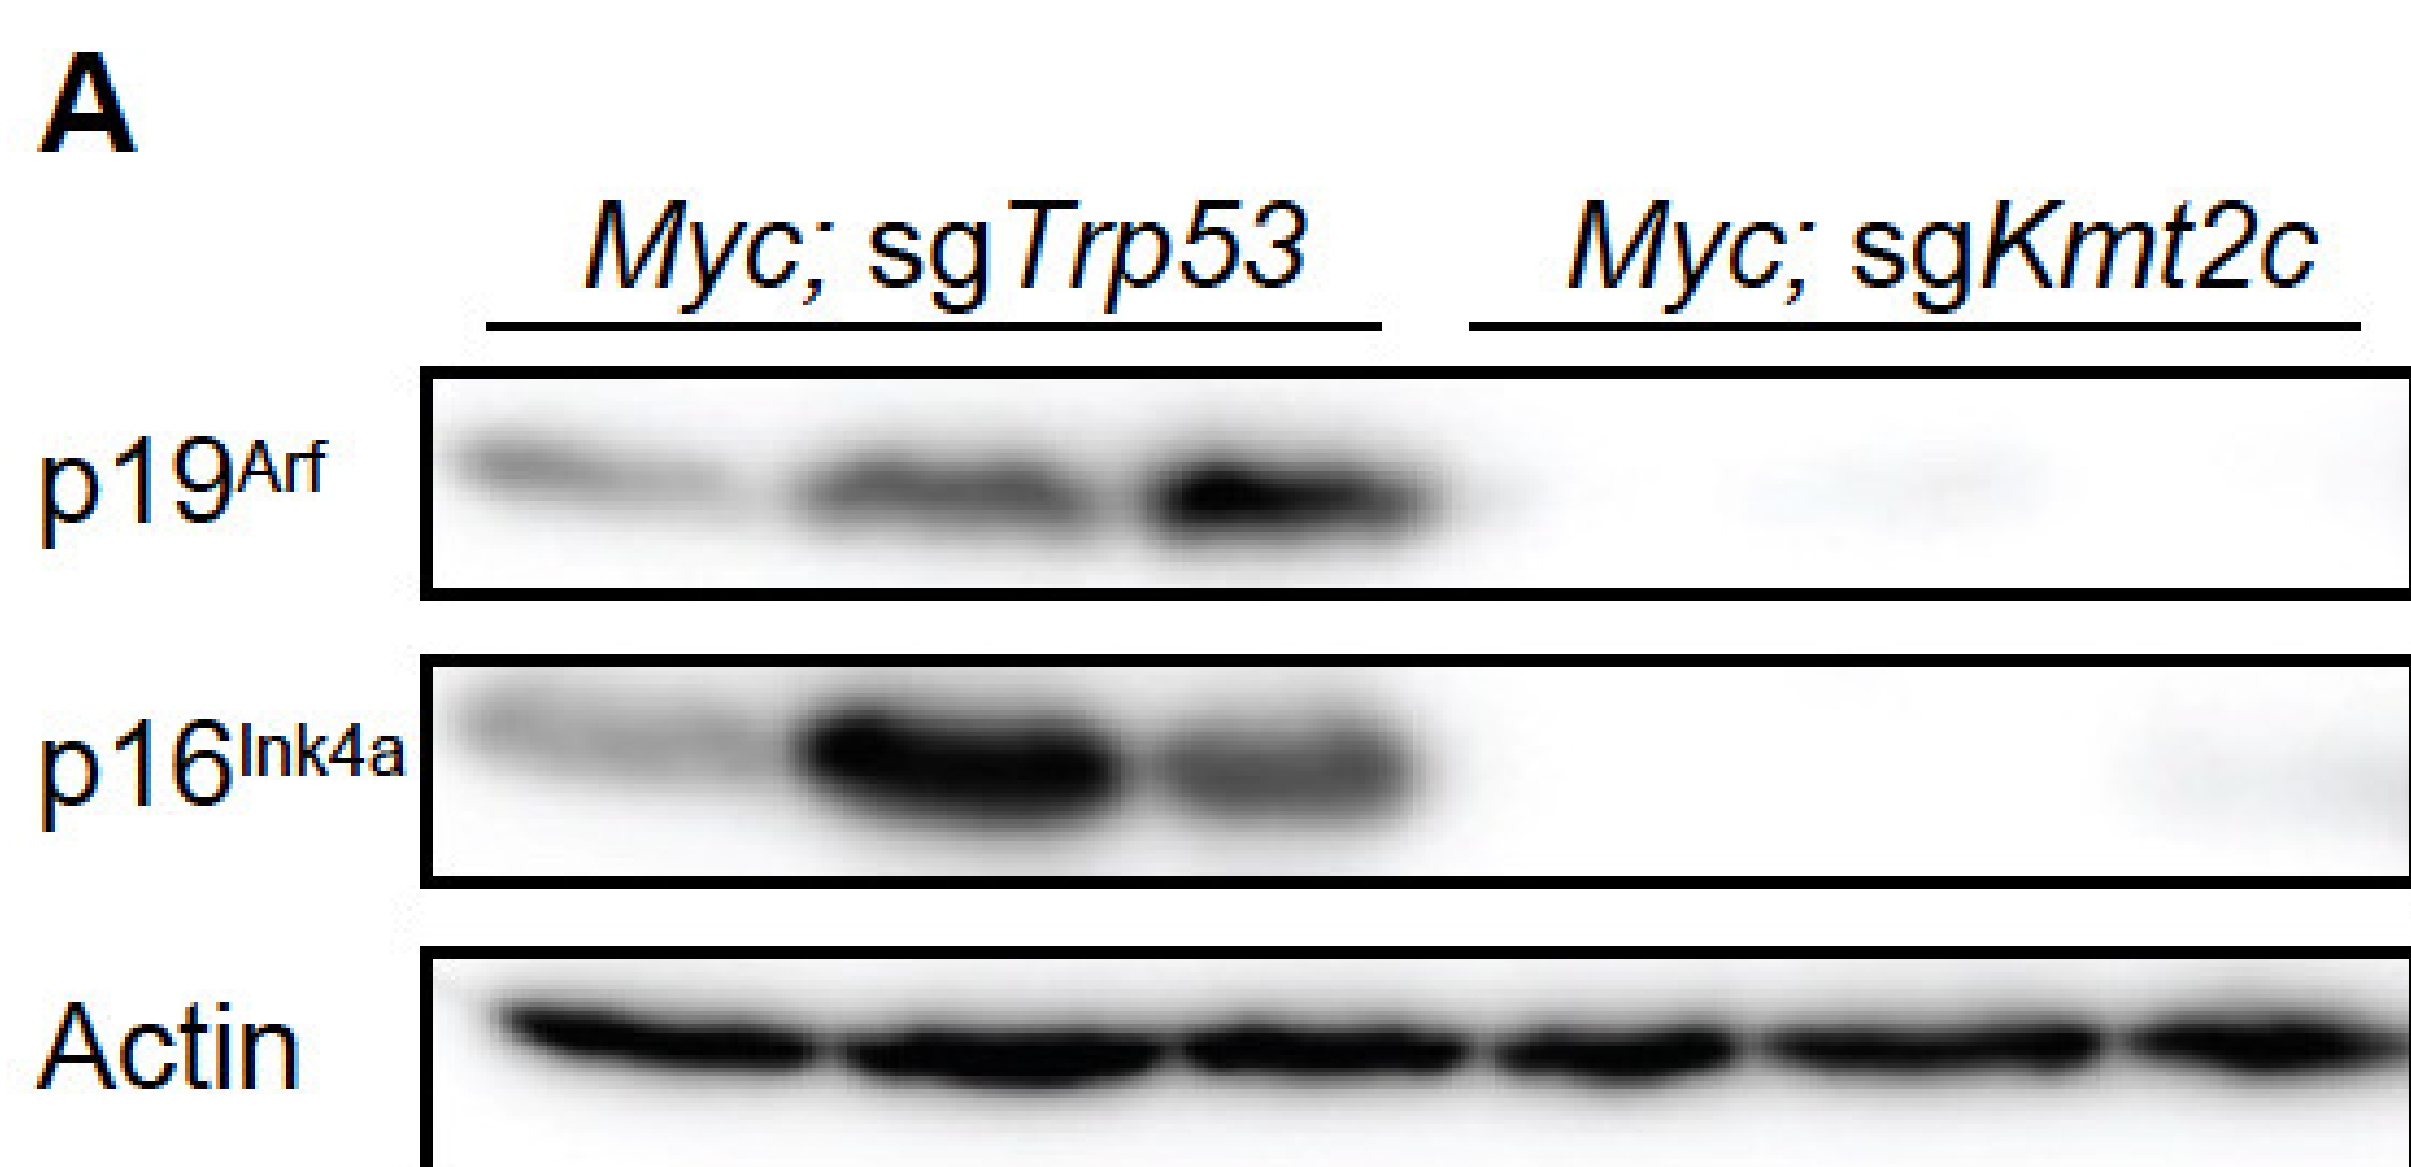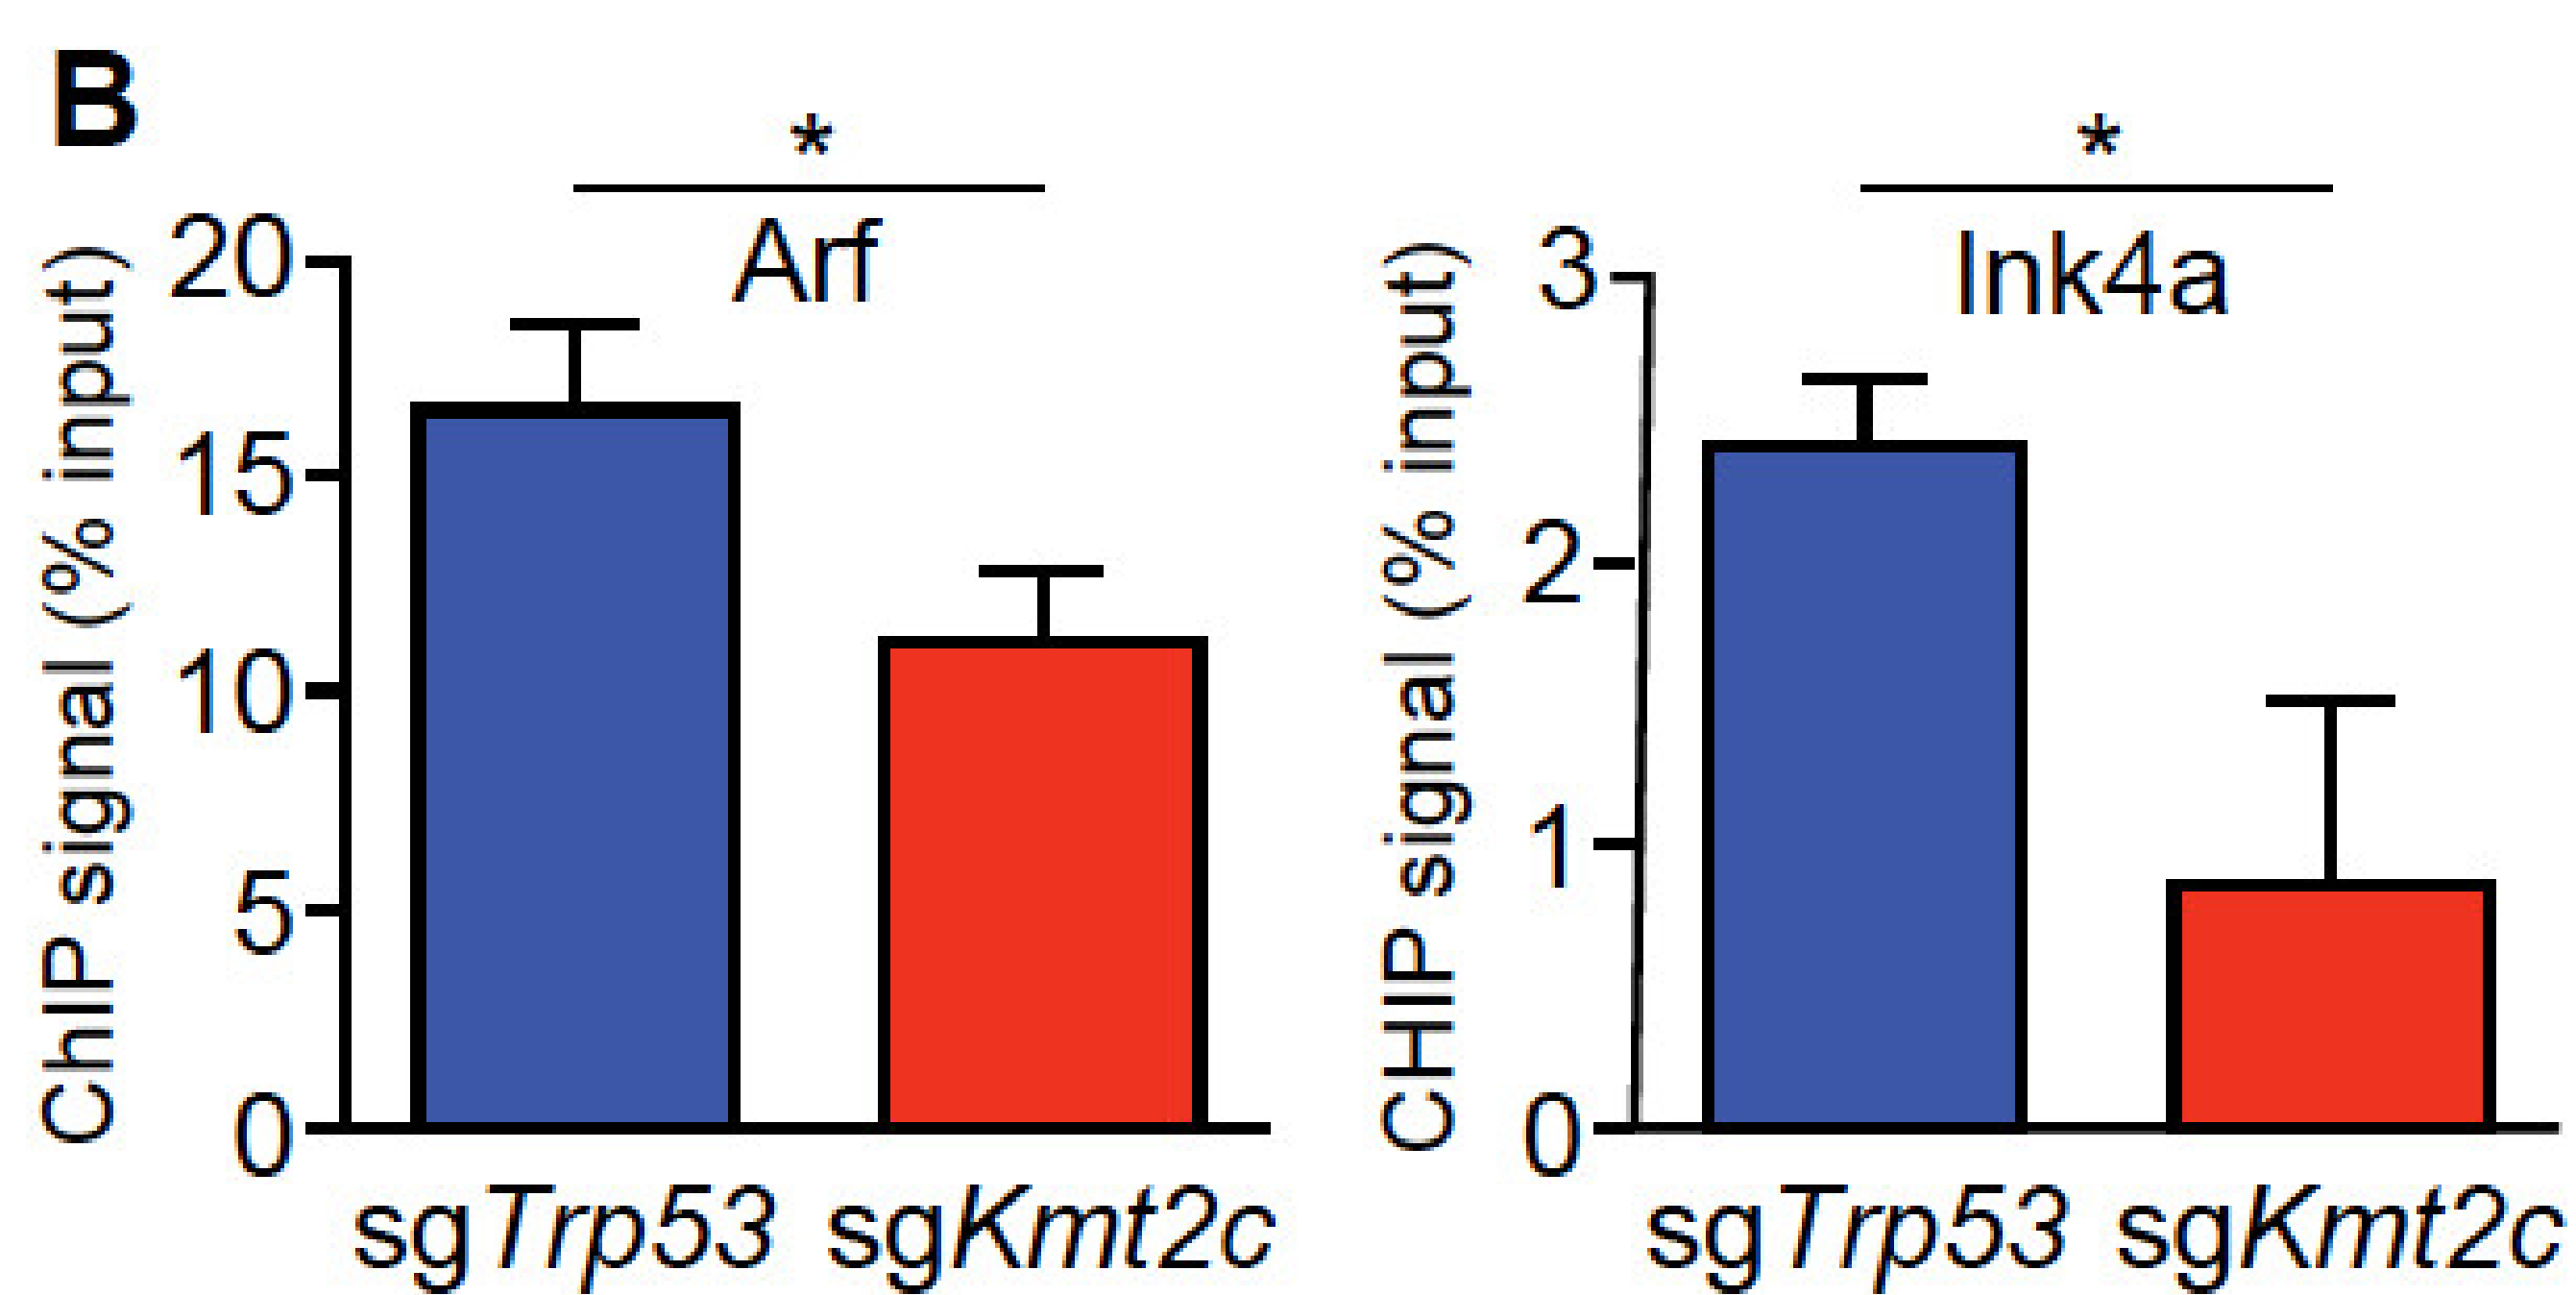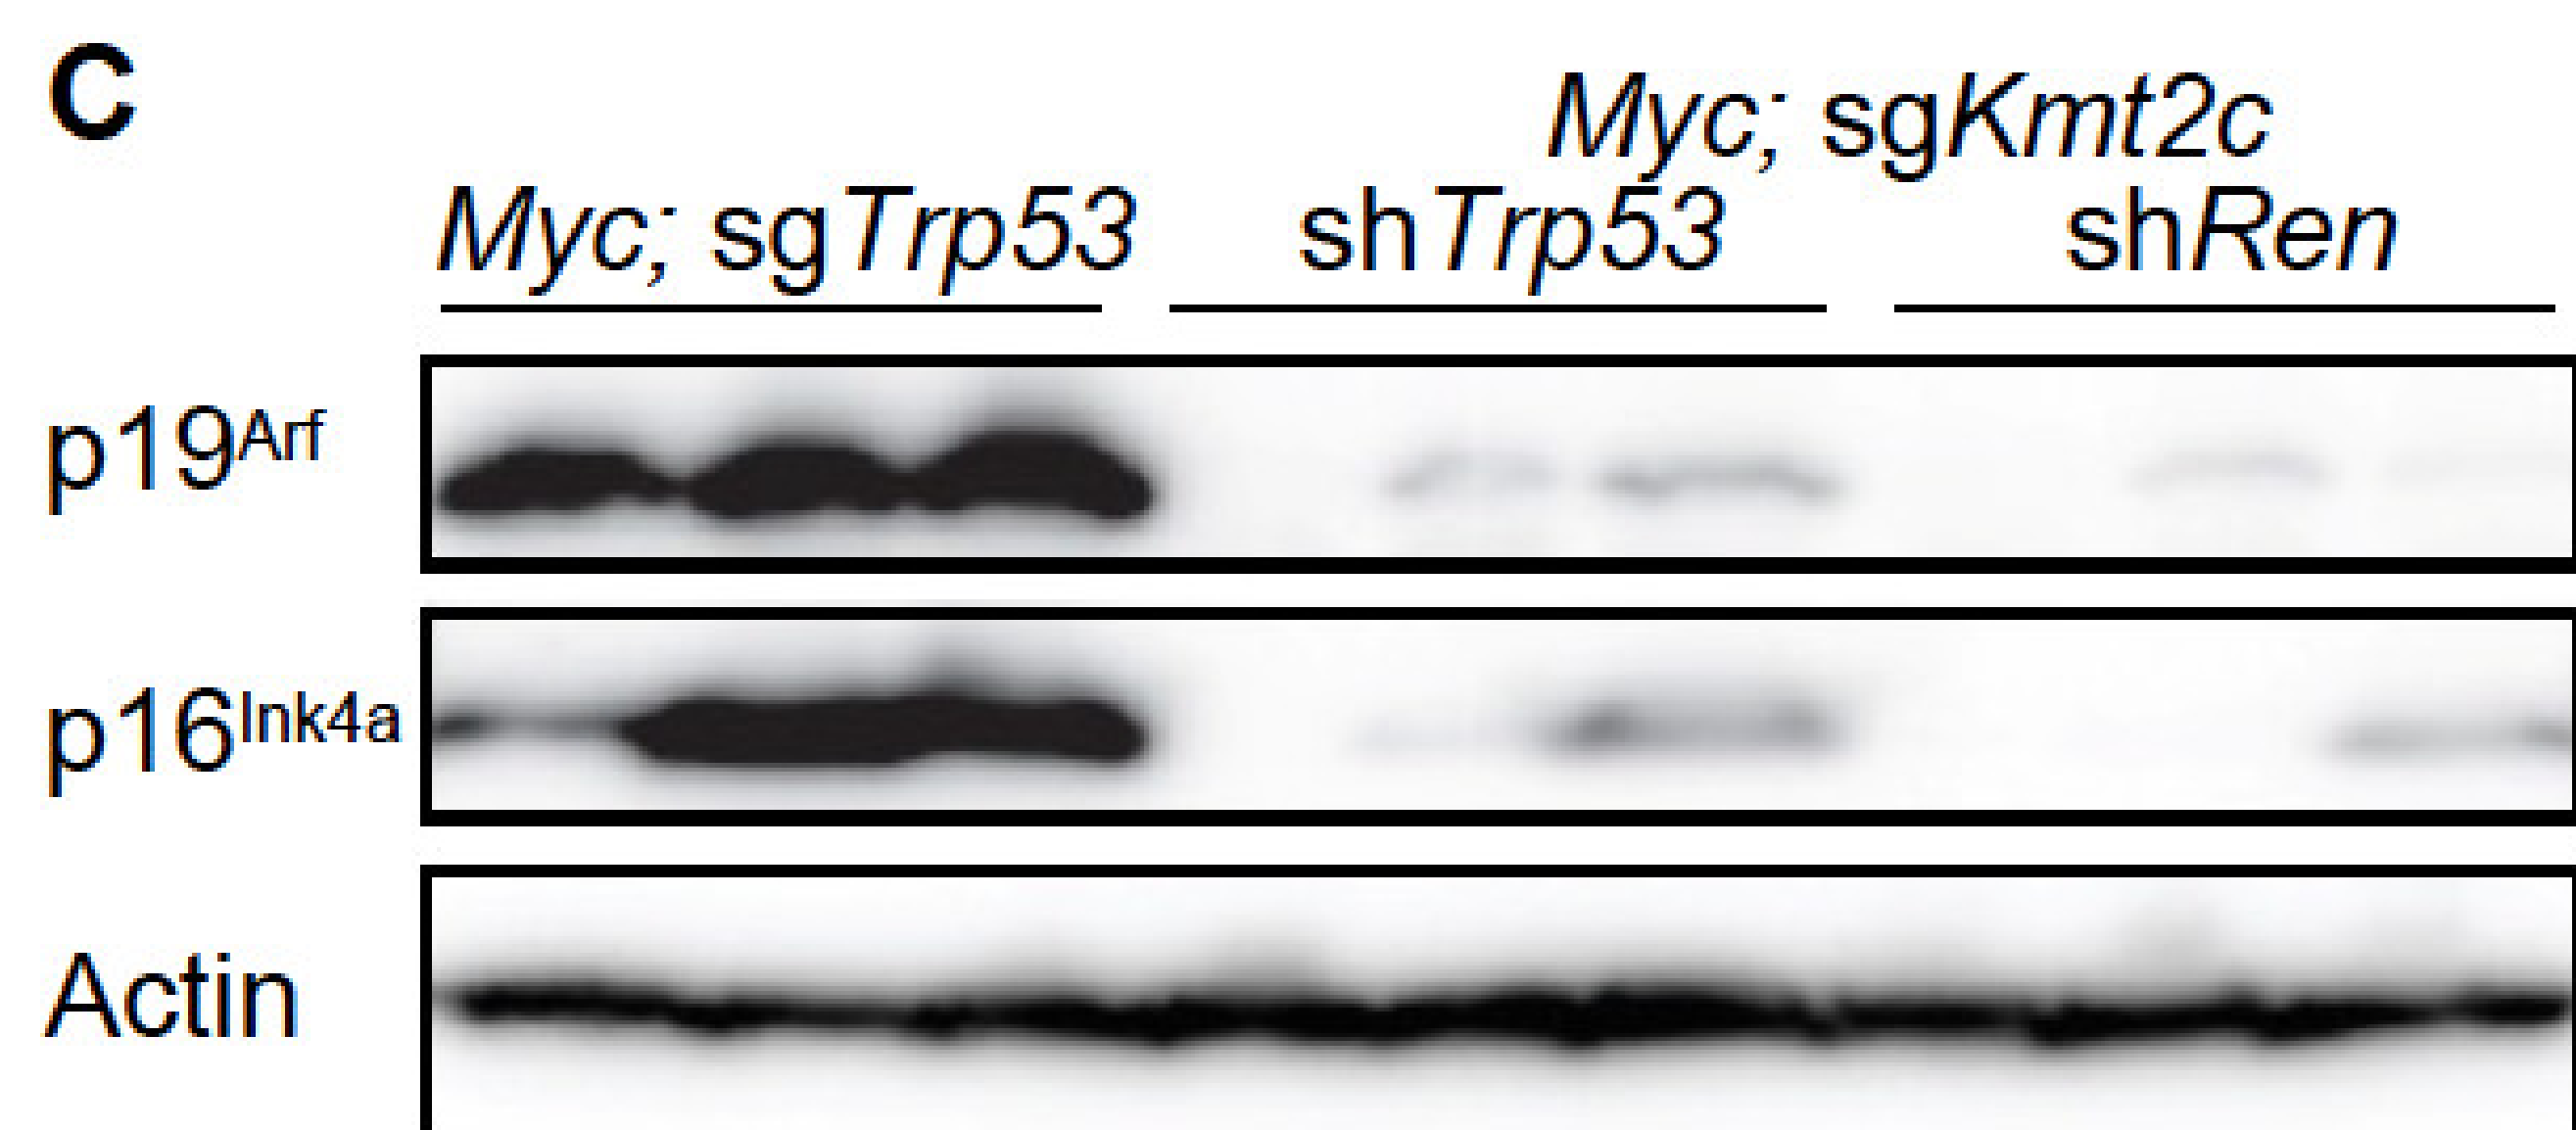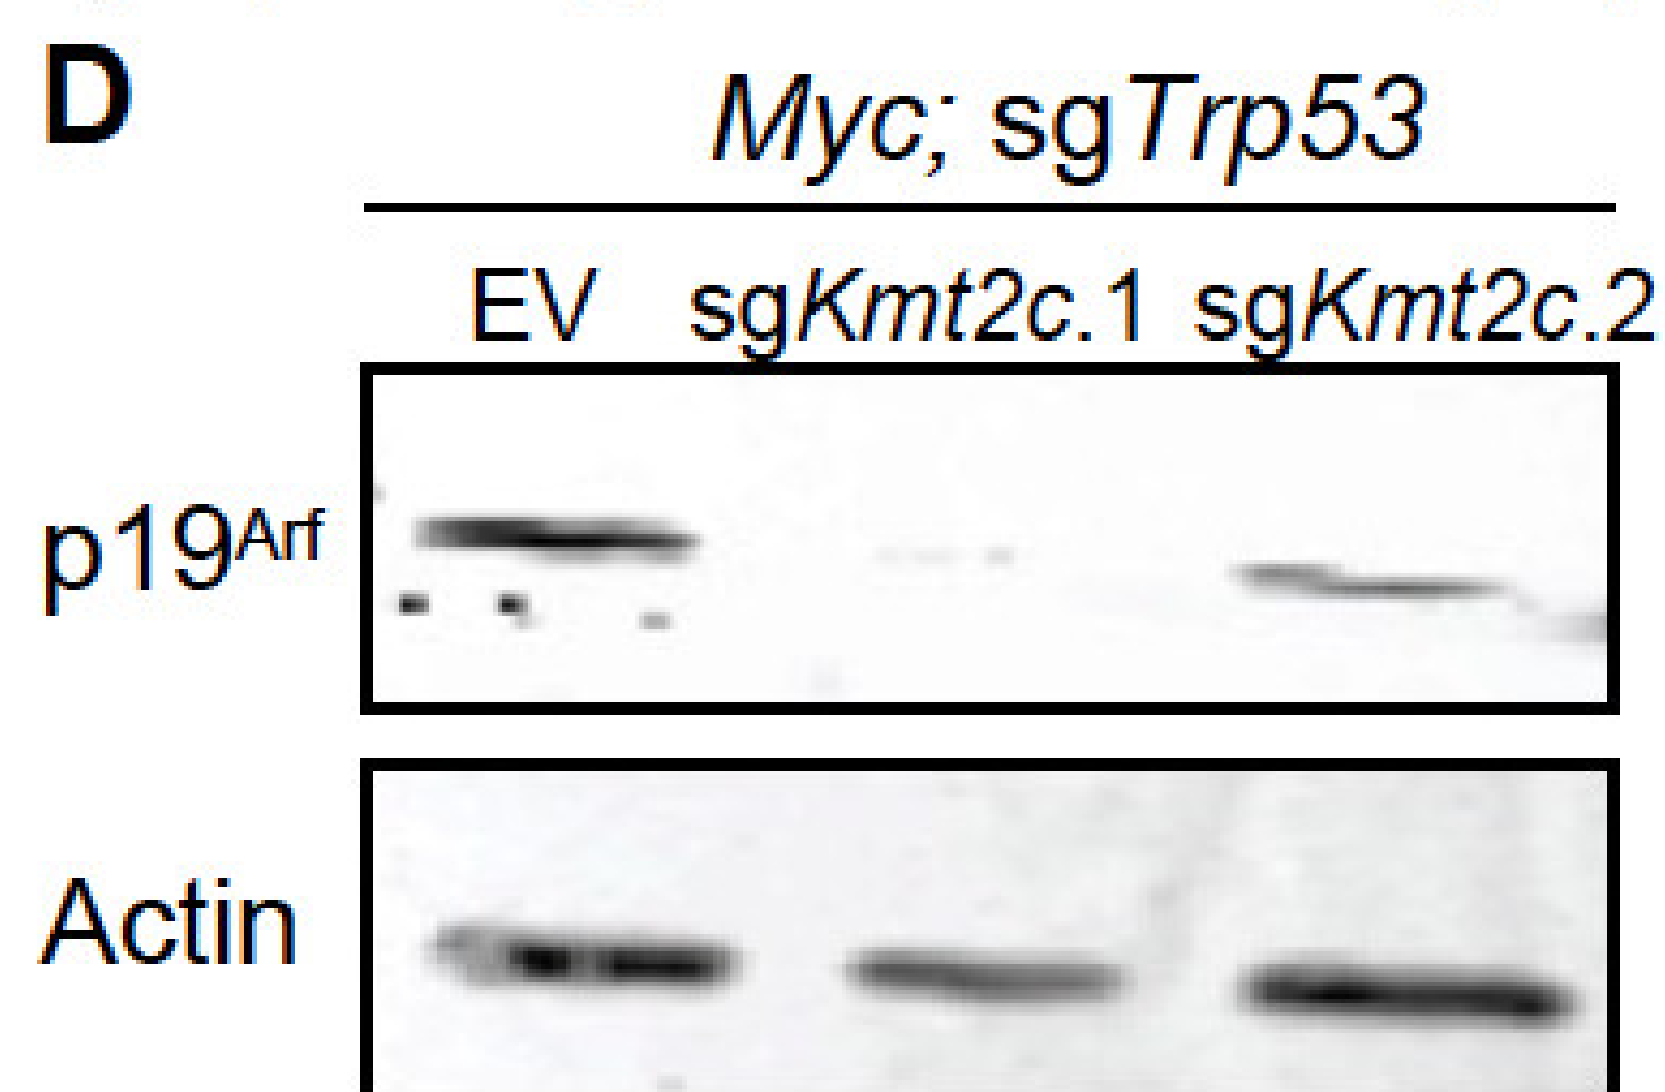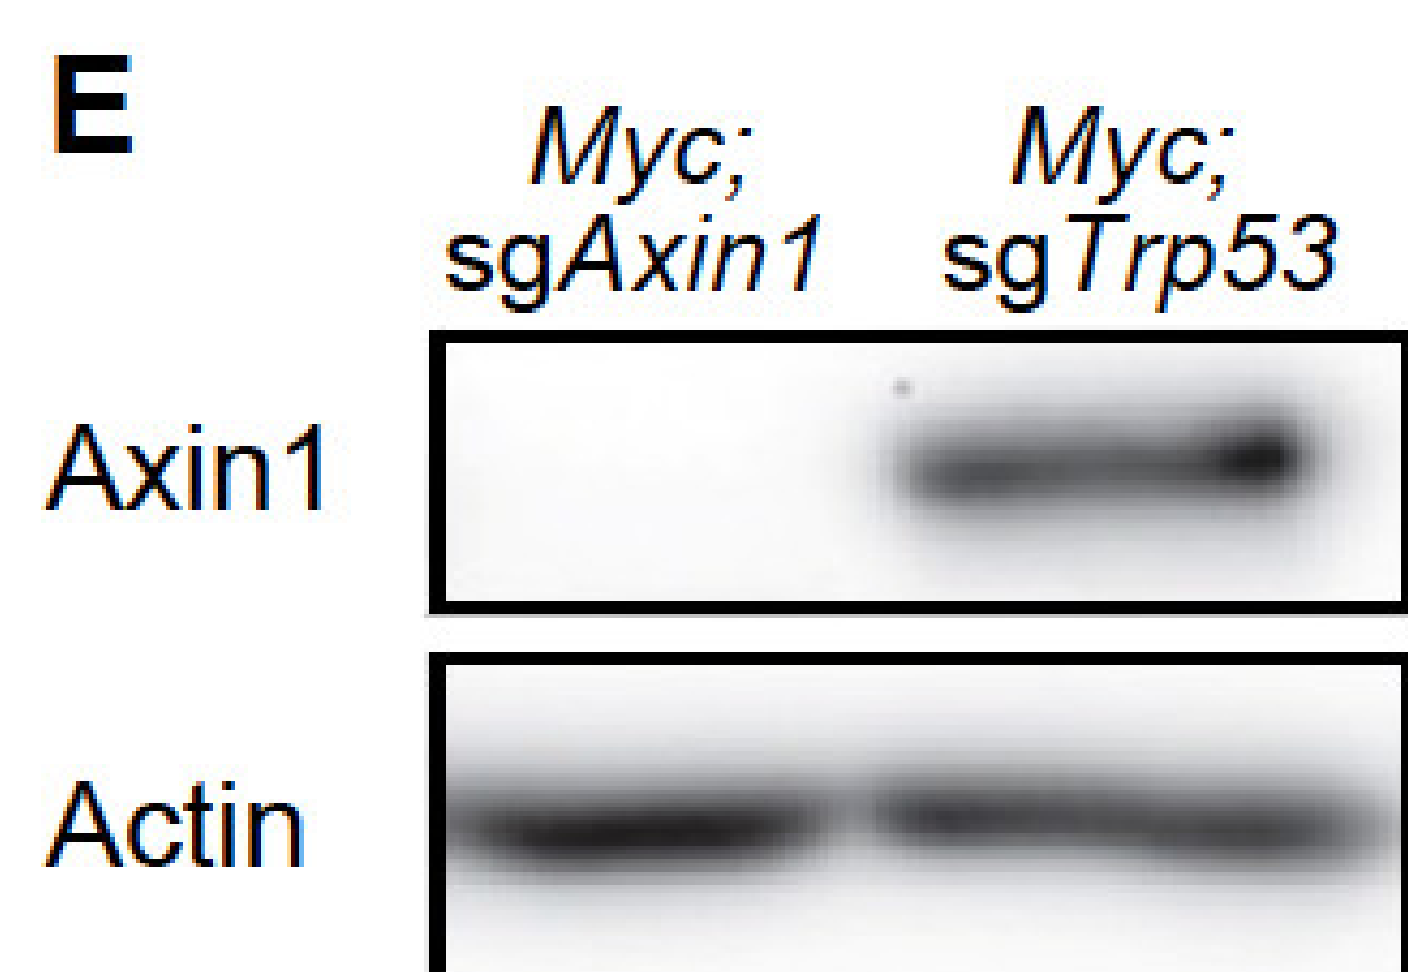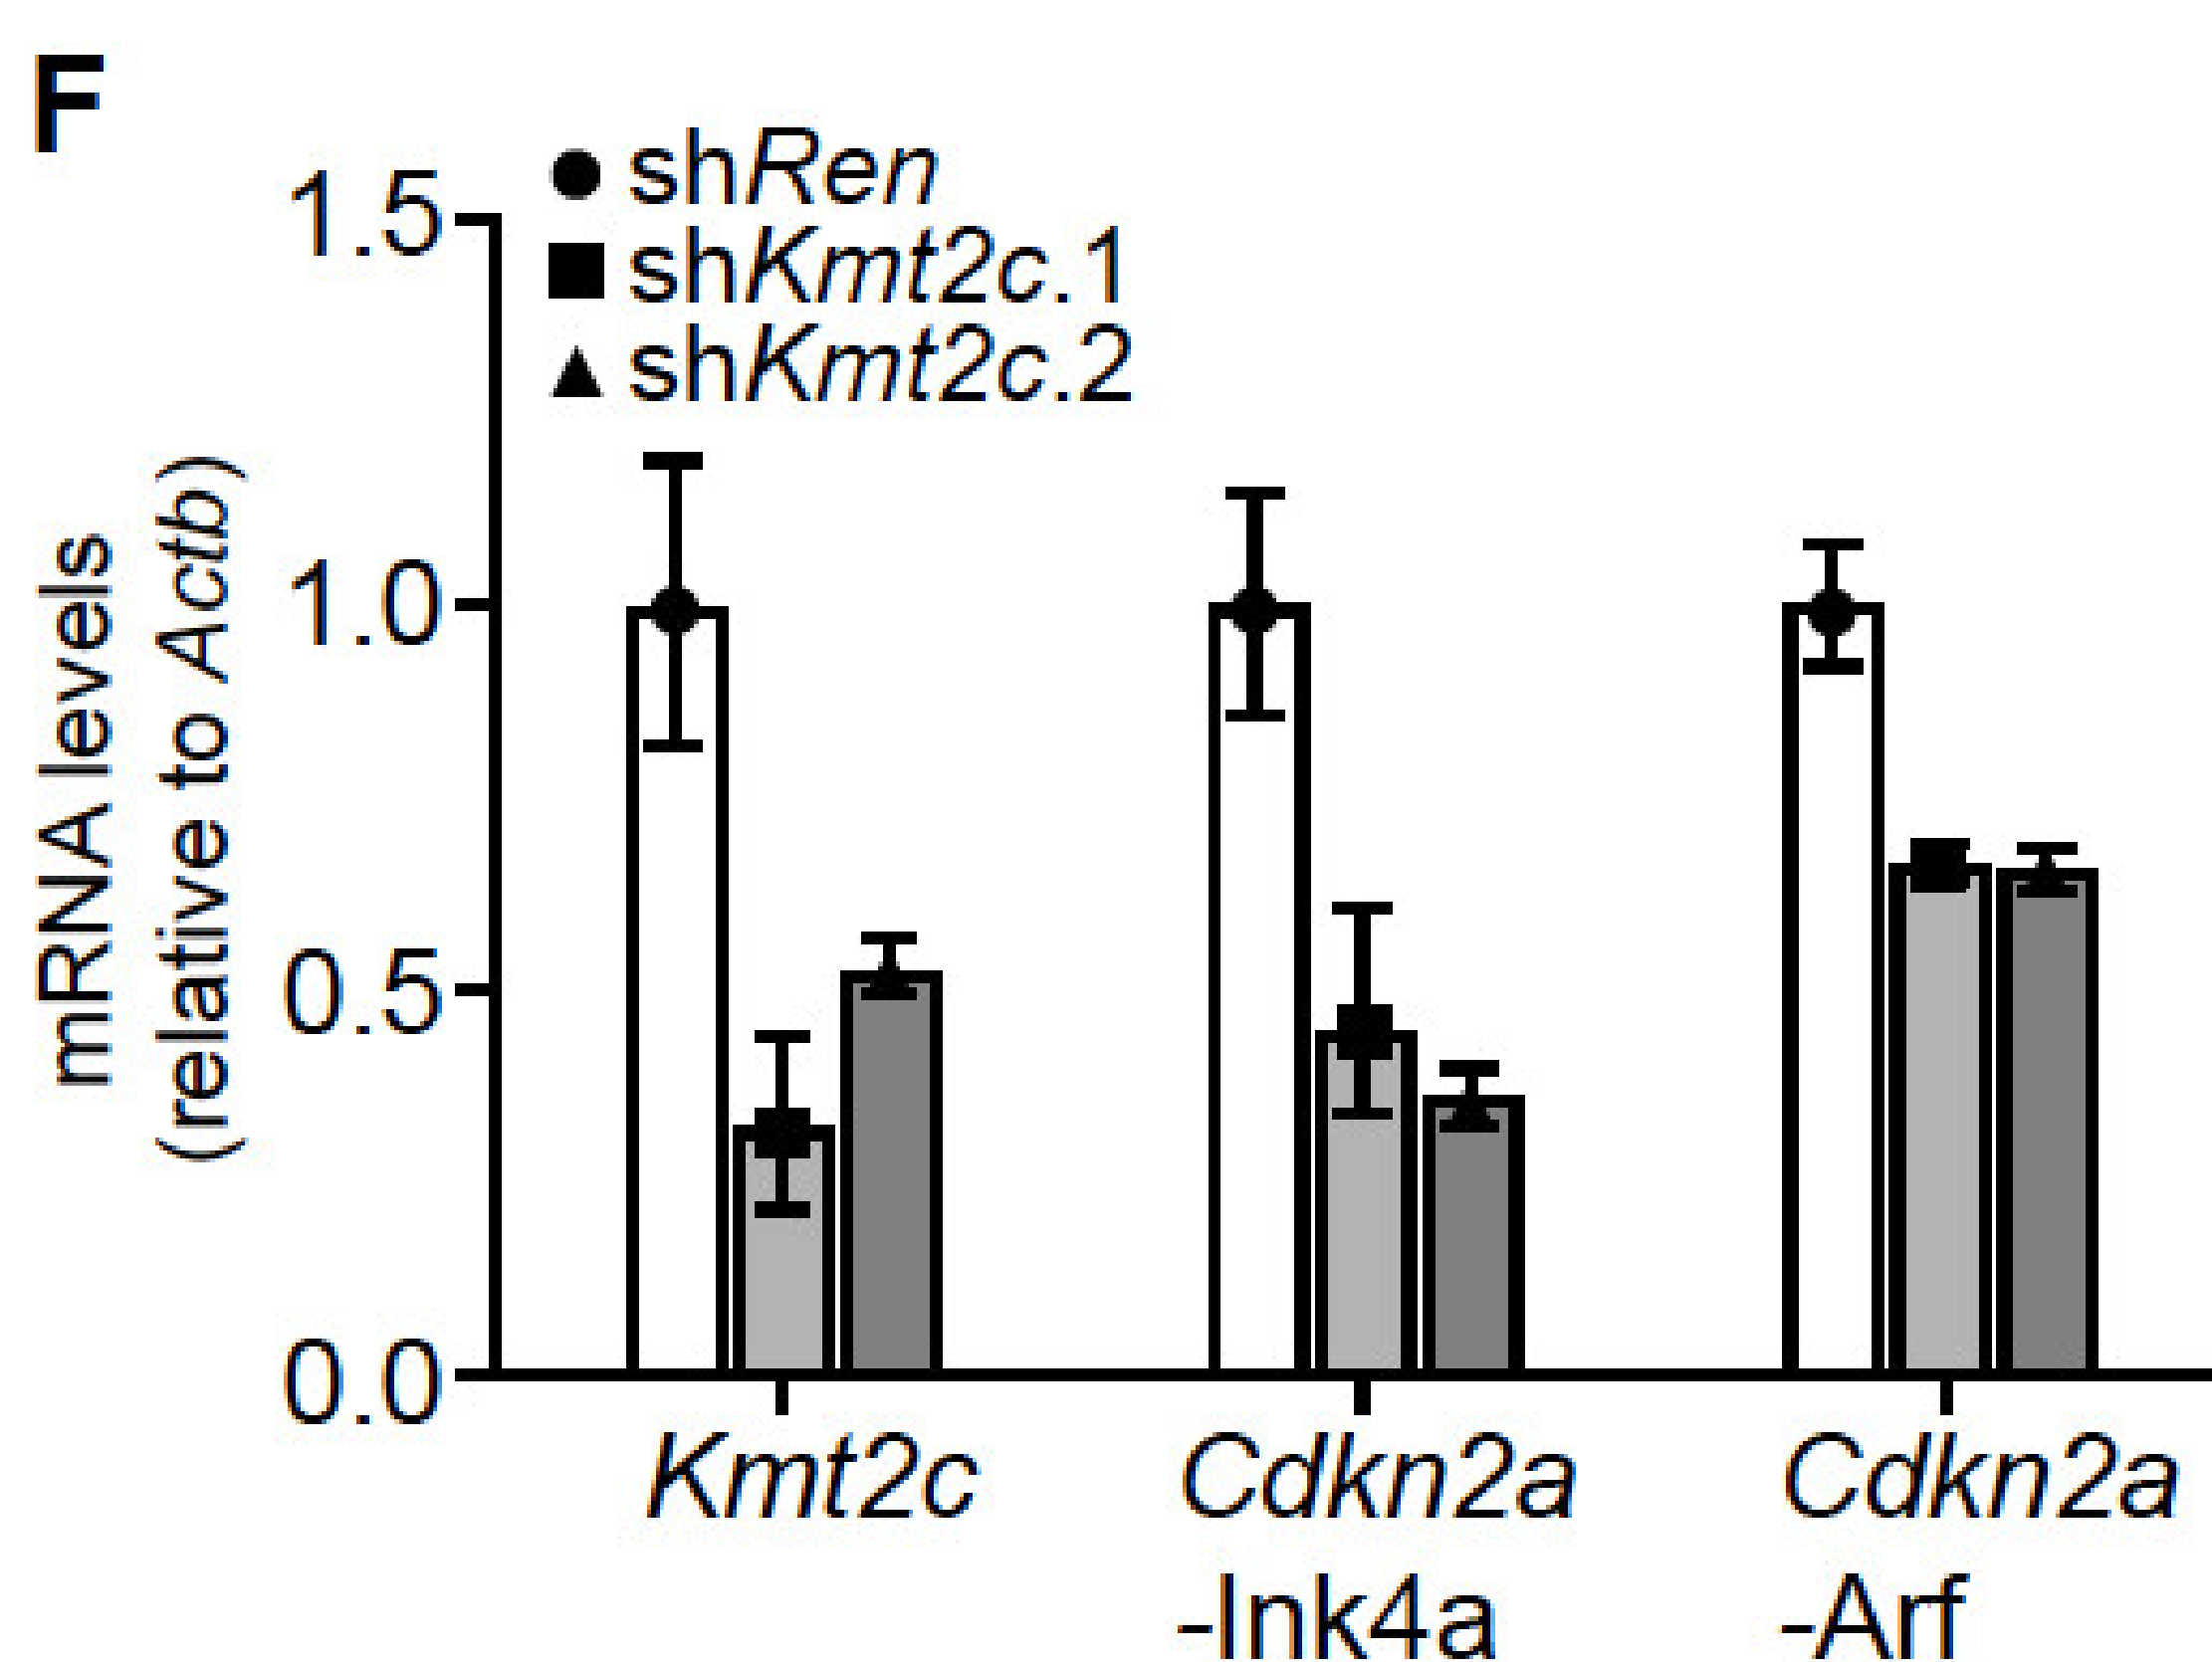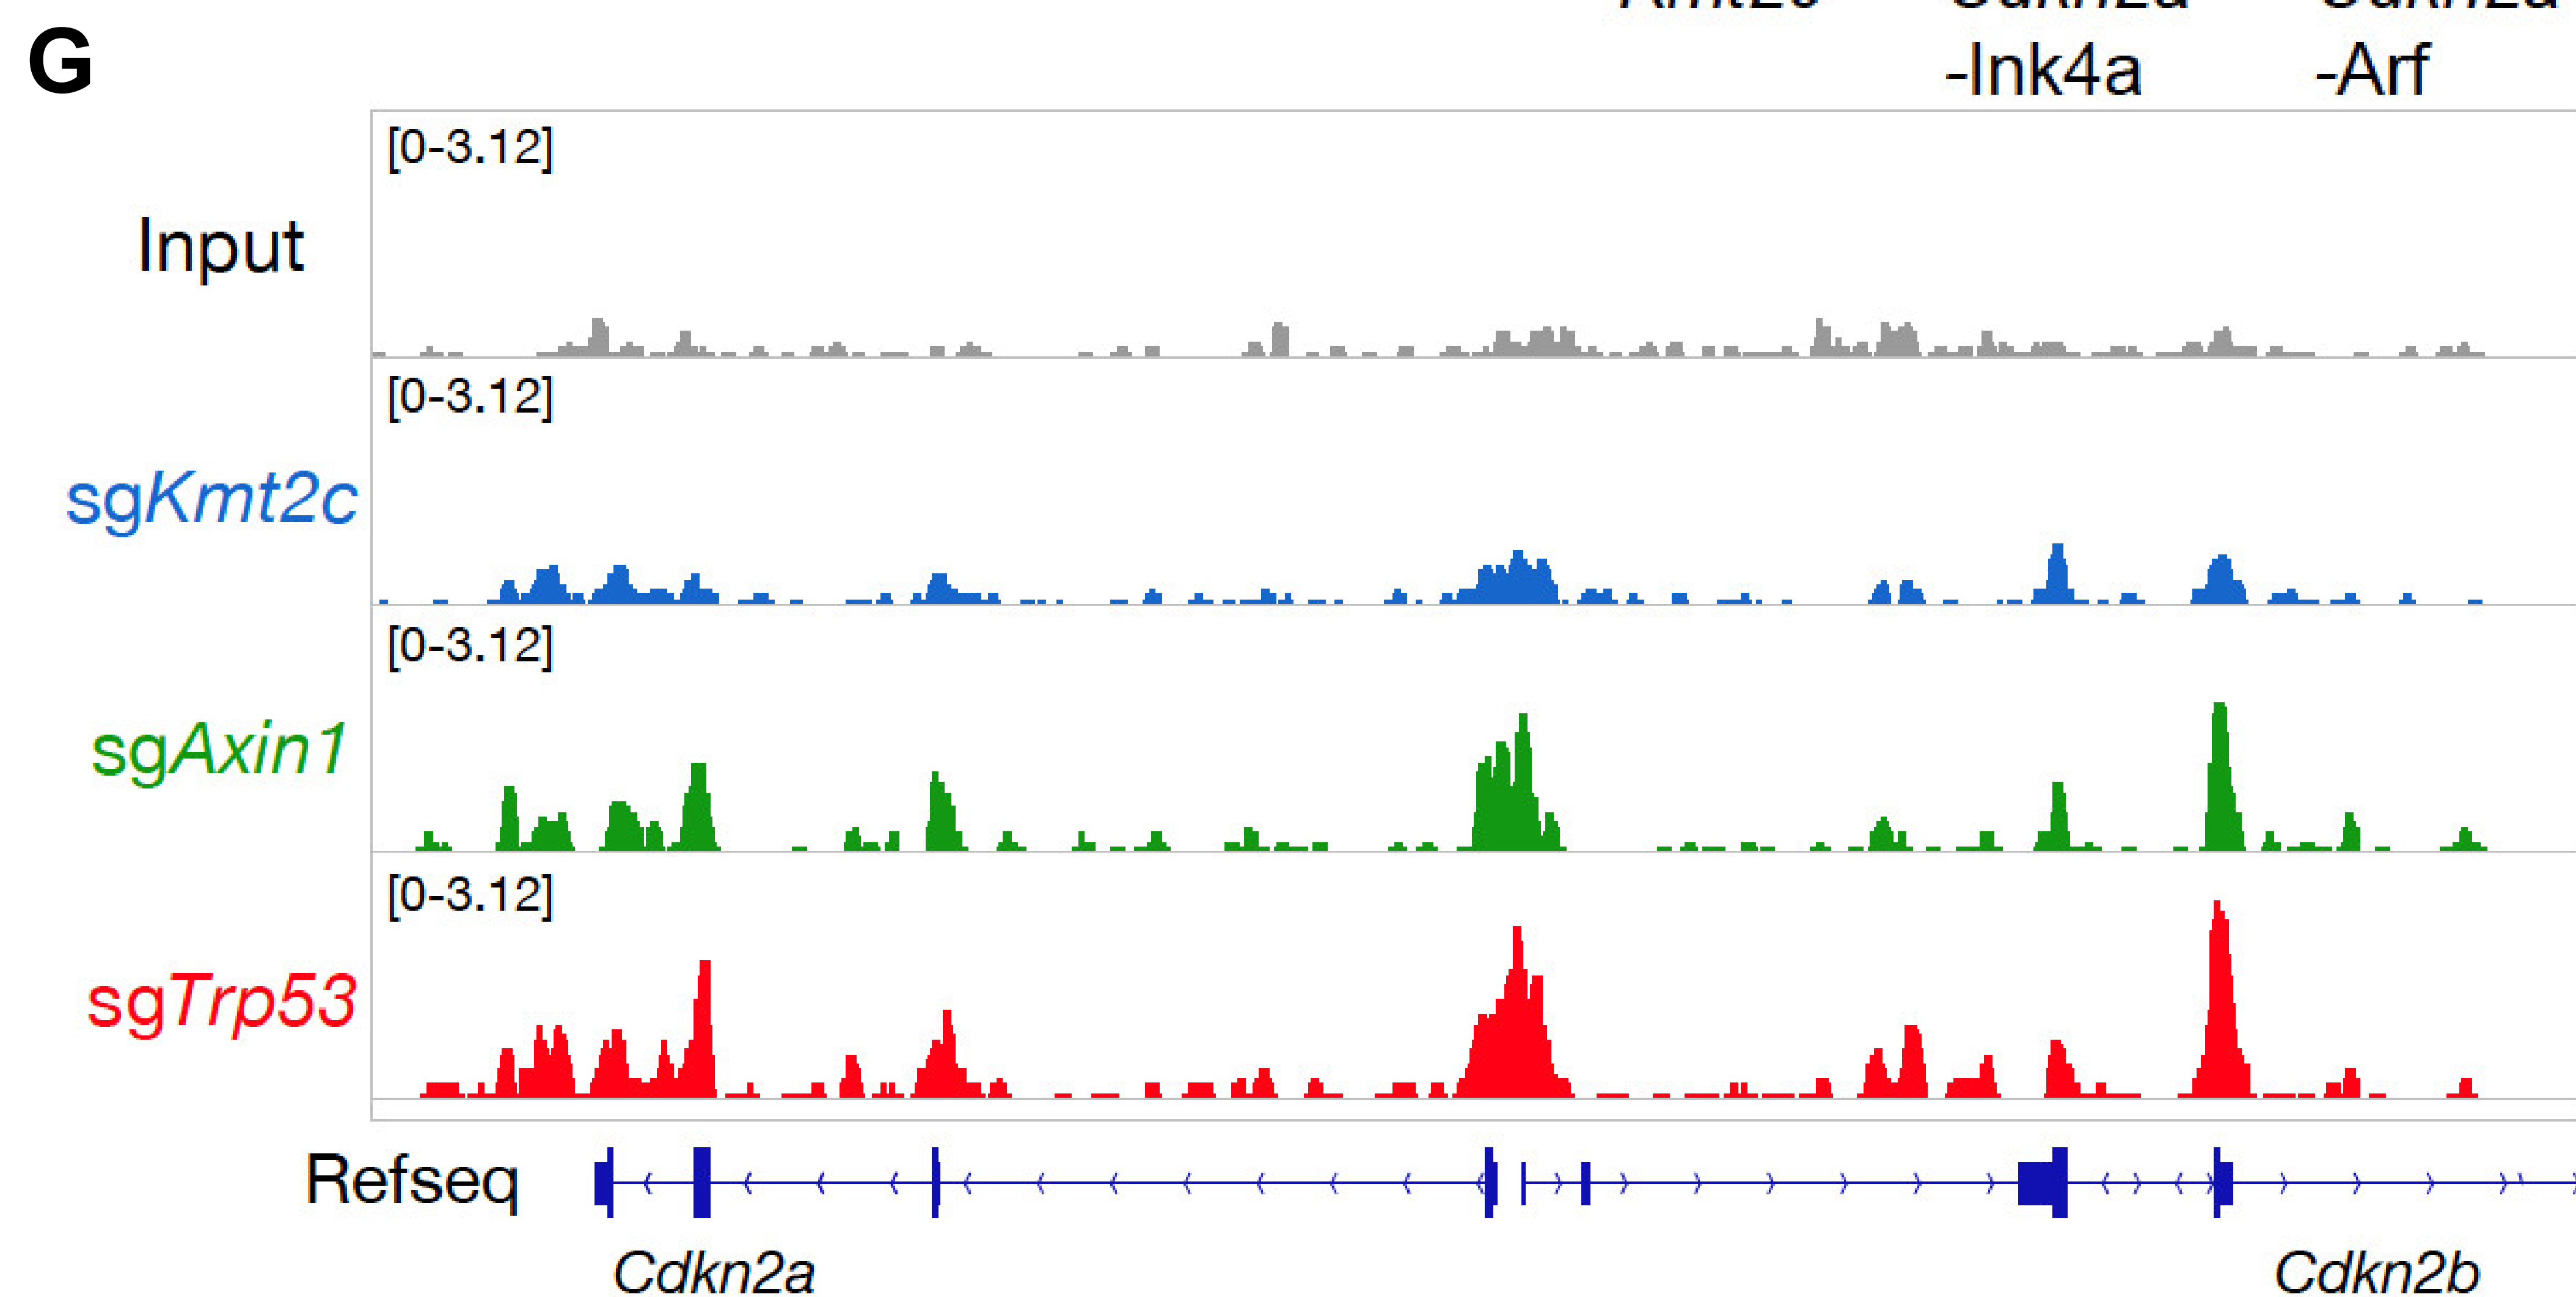

Supplement: supp [file elife-80854-supp-v1.zip]

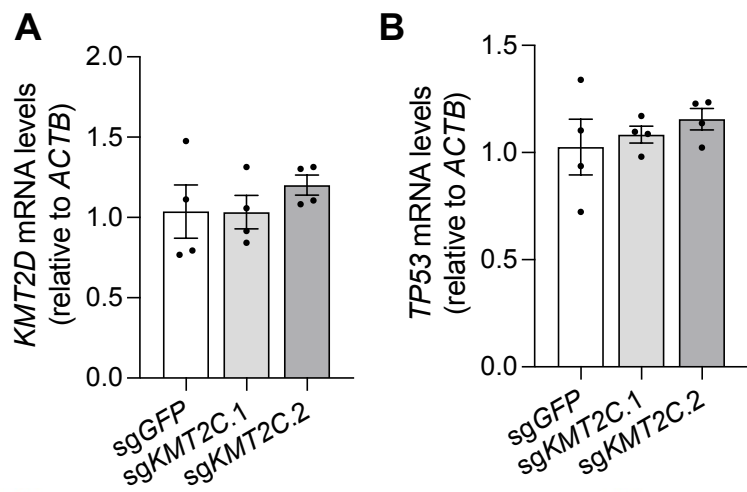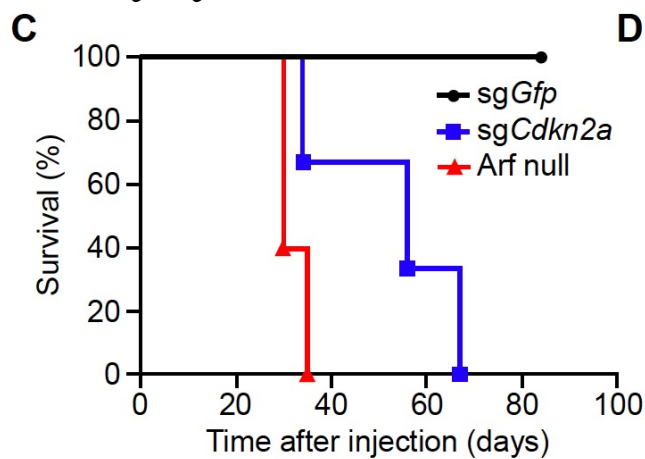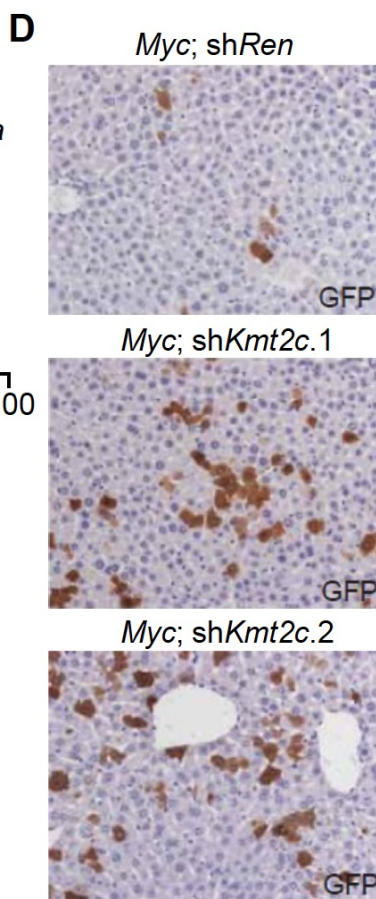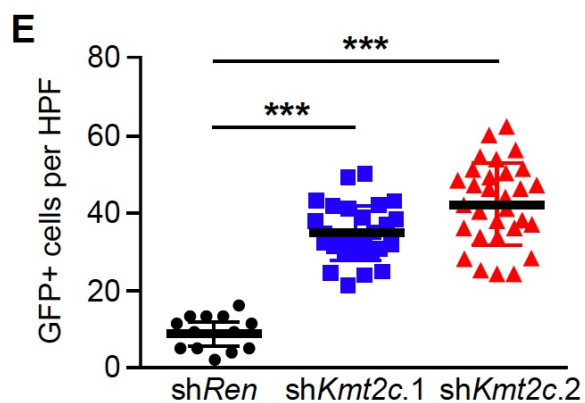

Supplement: supp [file elife-80854-supp-v1.zip]

**A**

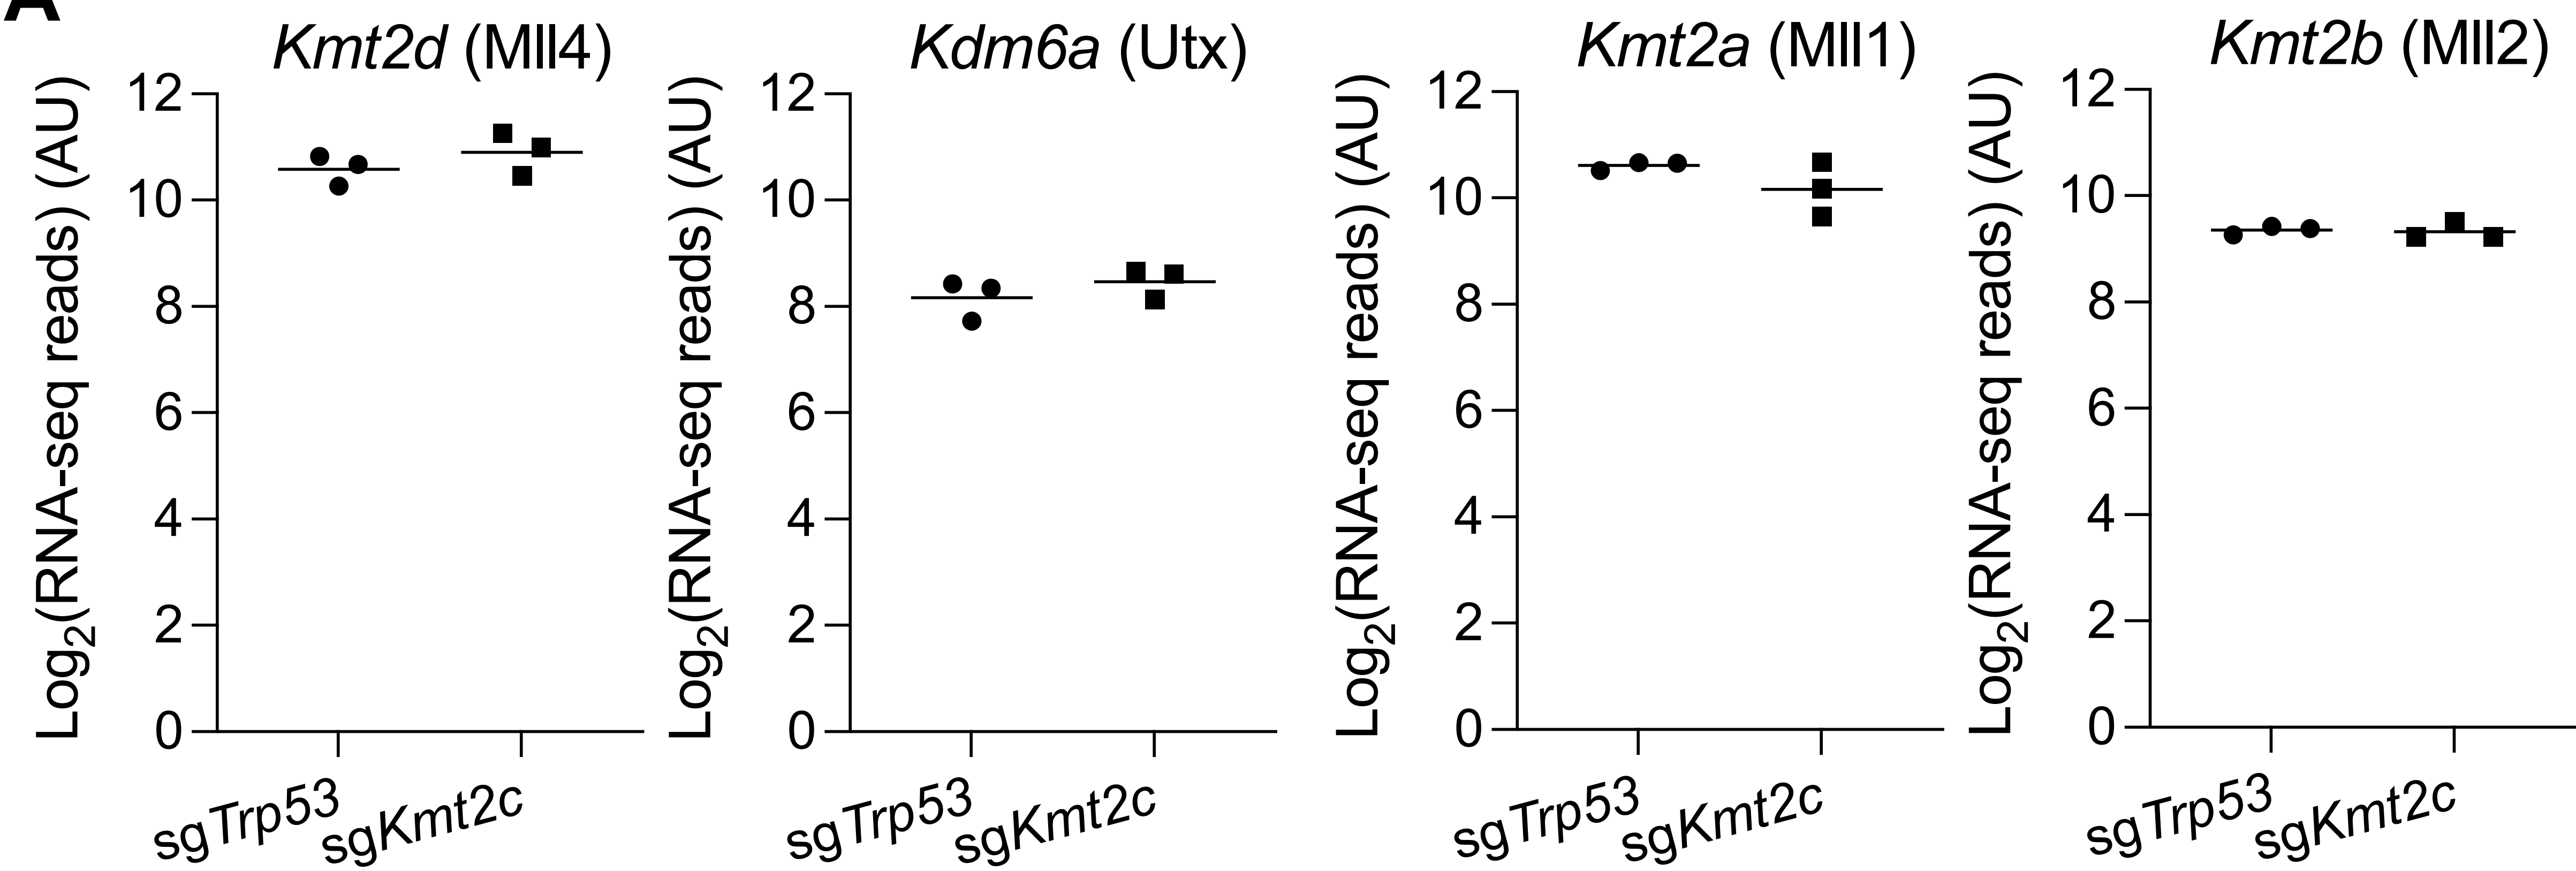

**B**

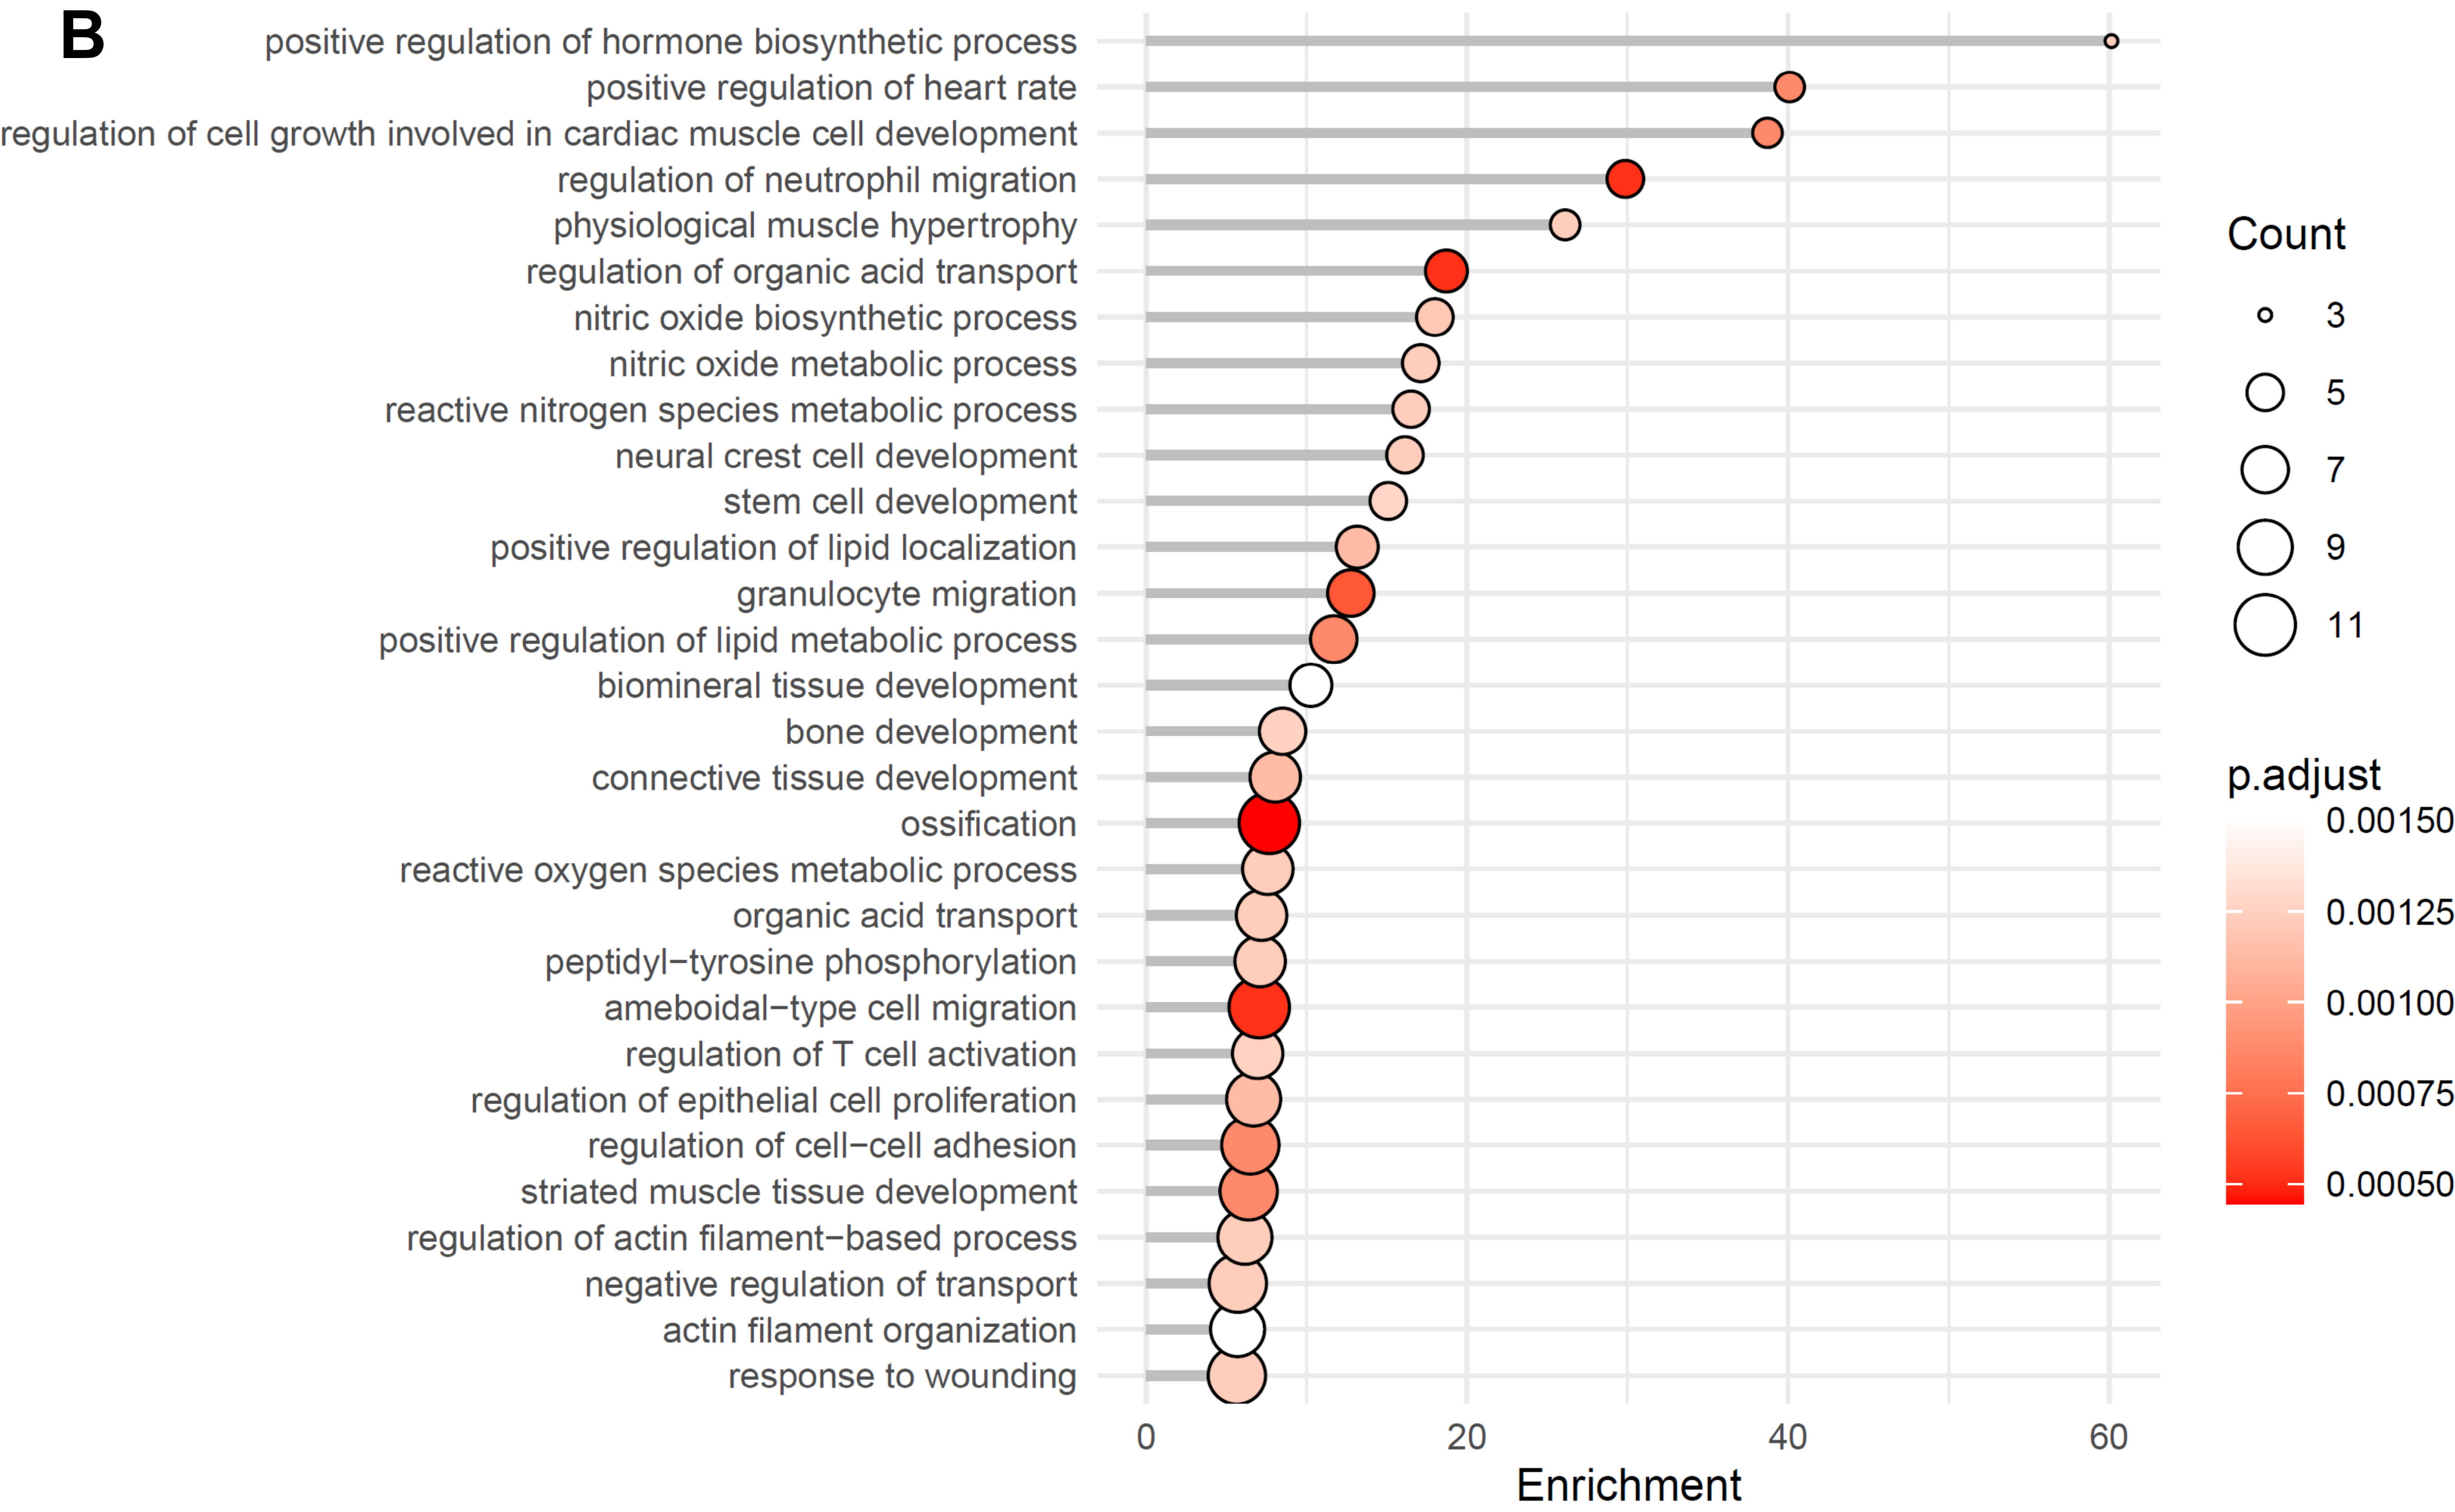

Supplement: supp [file elife-80854-supp-v1.zip]

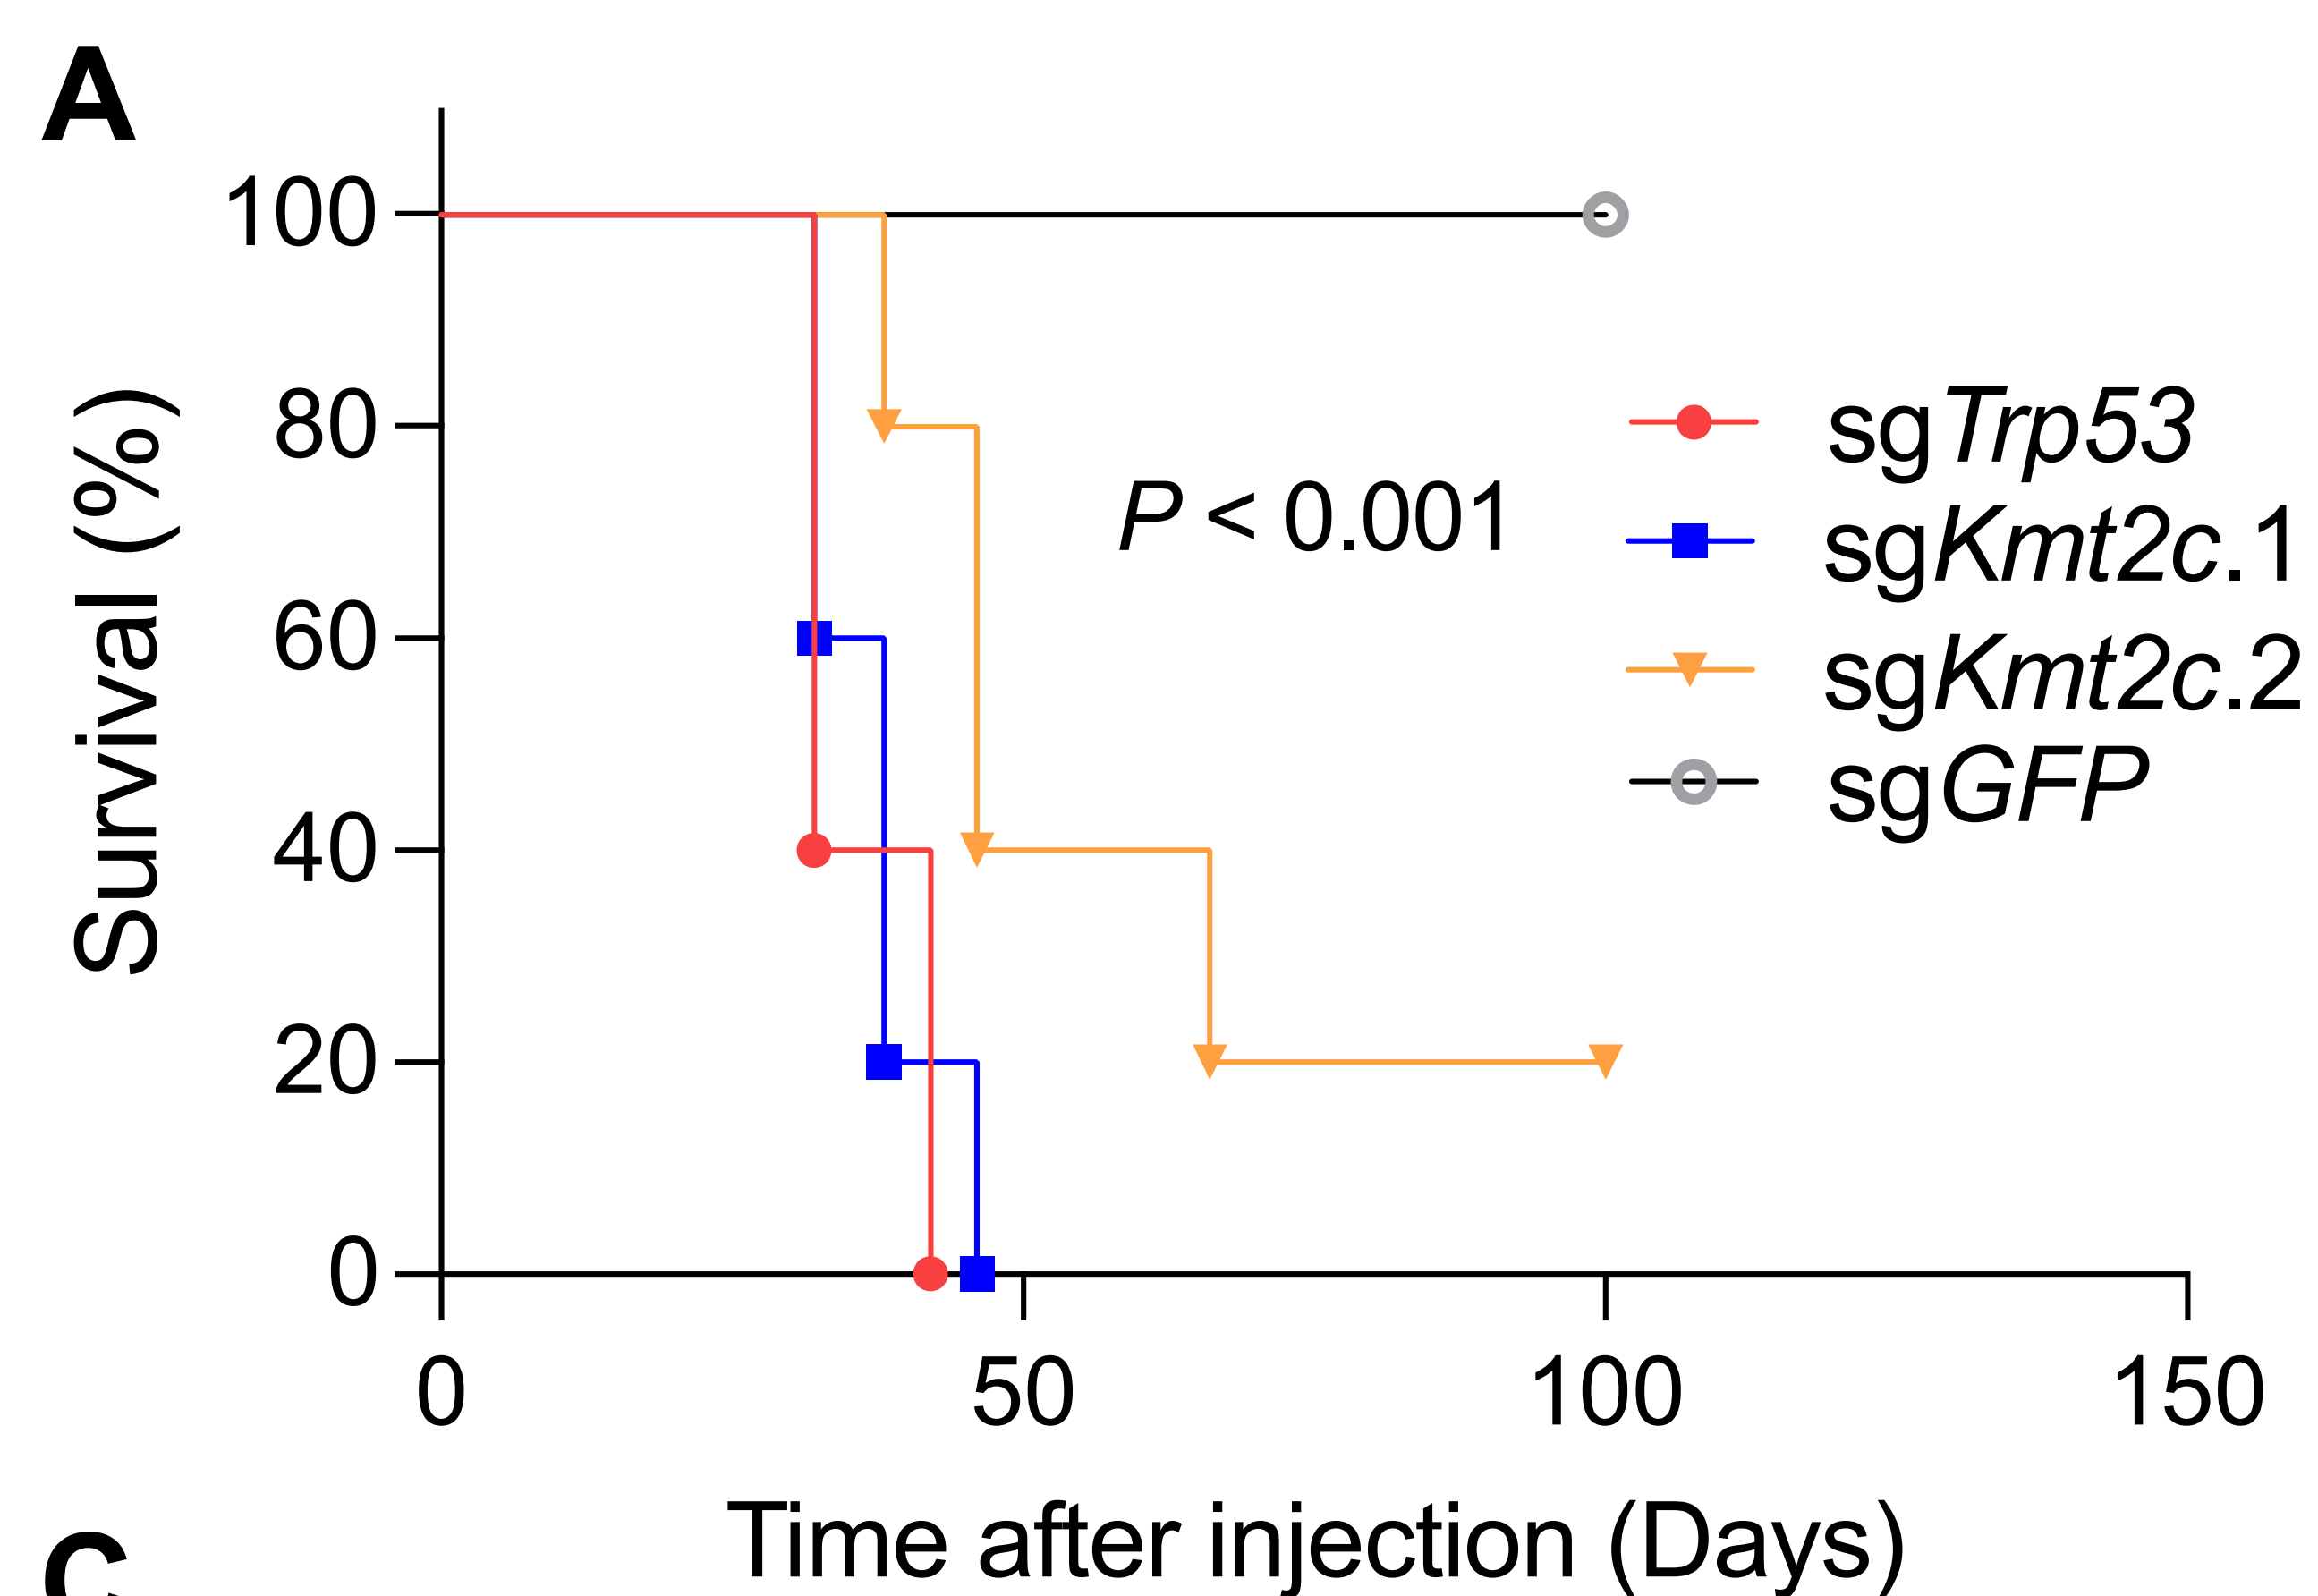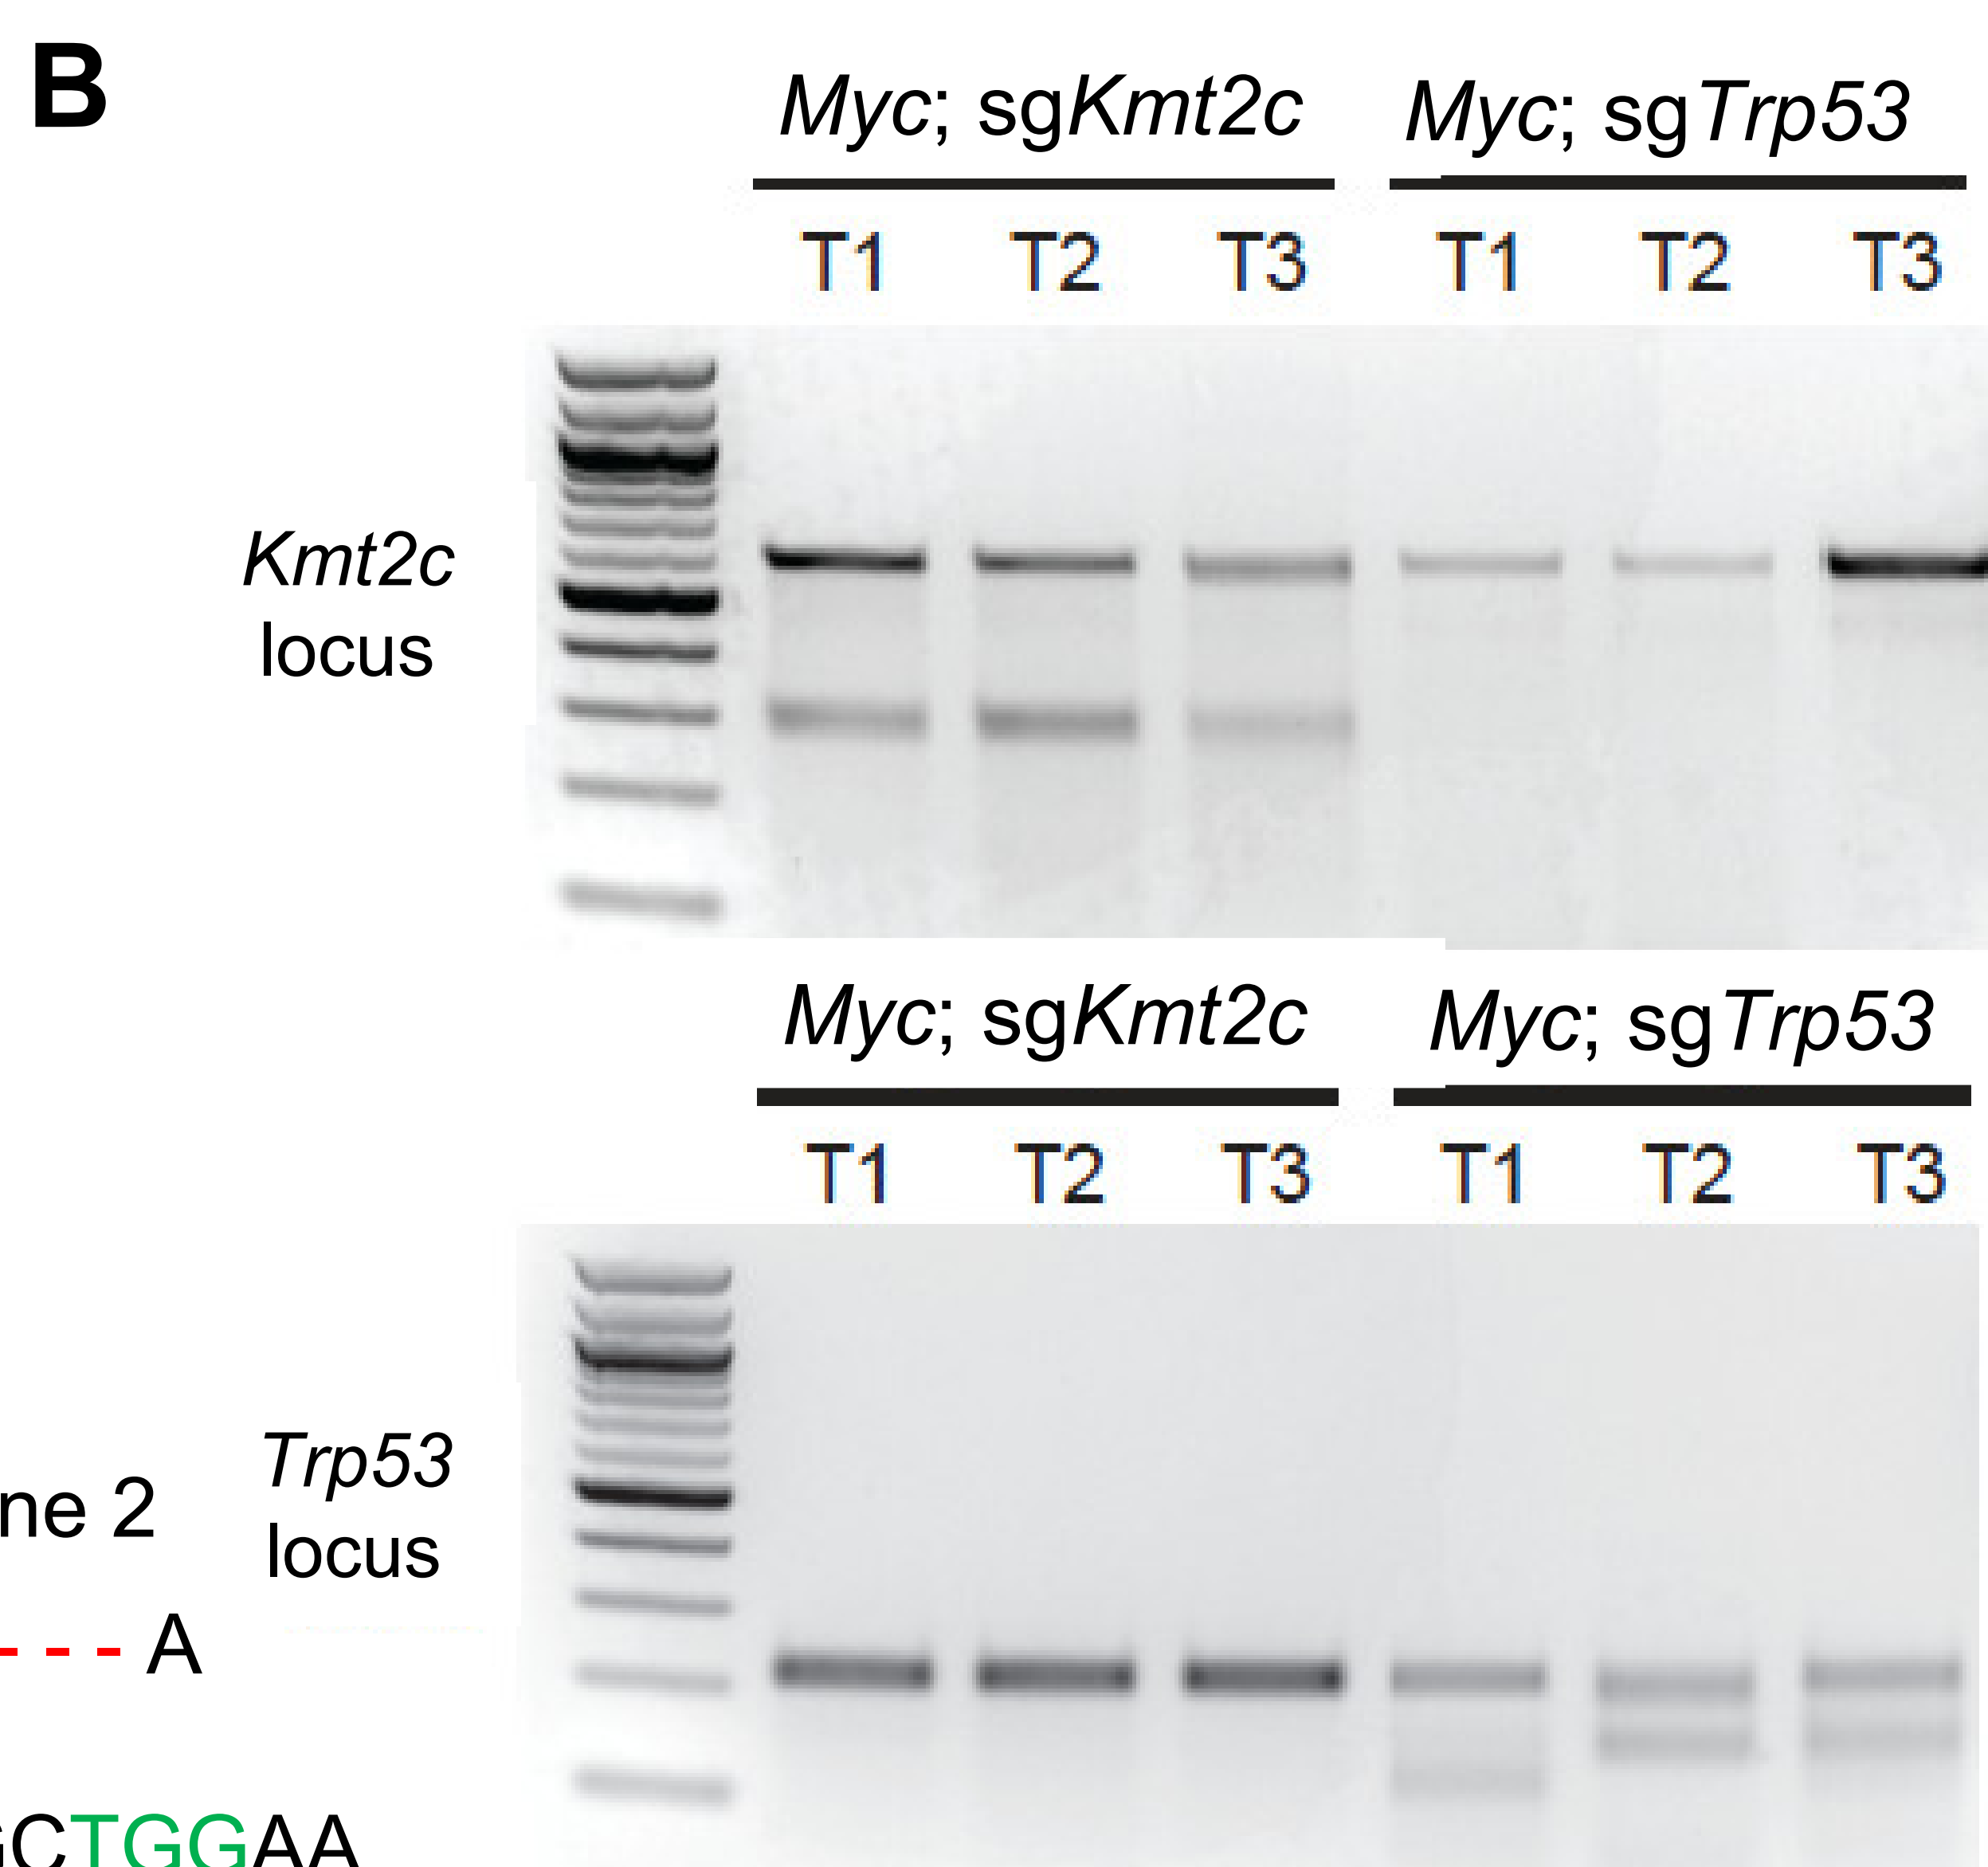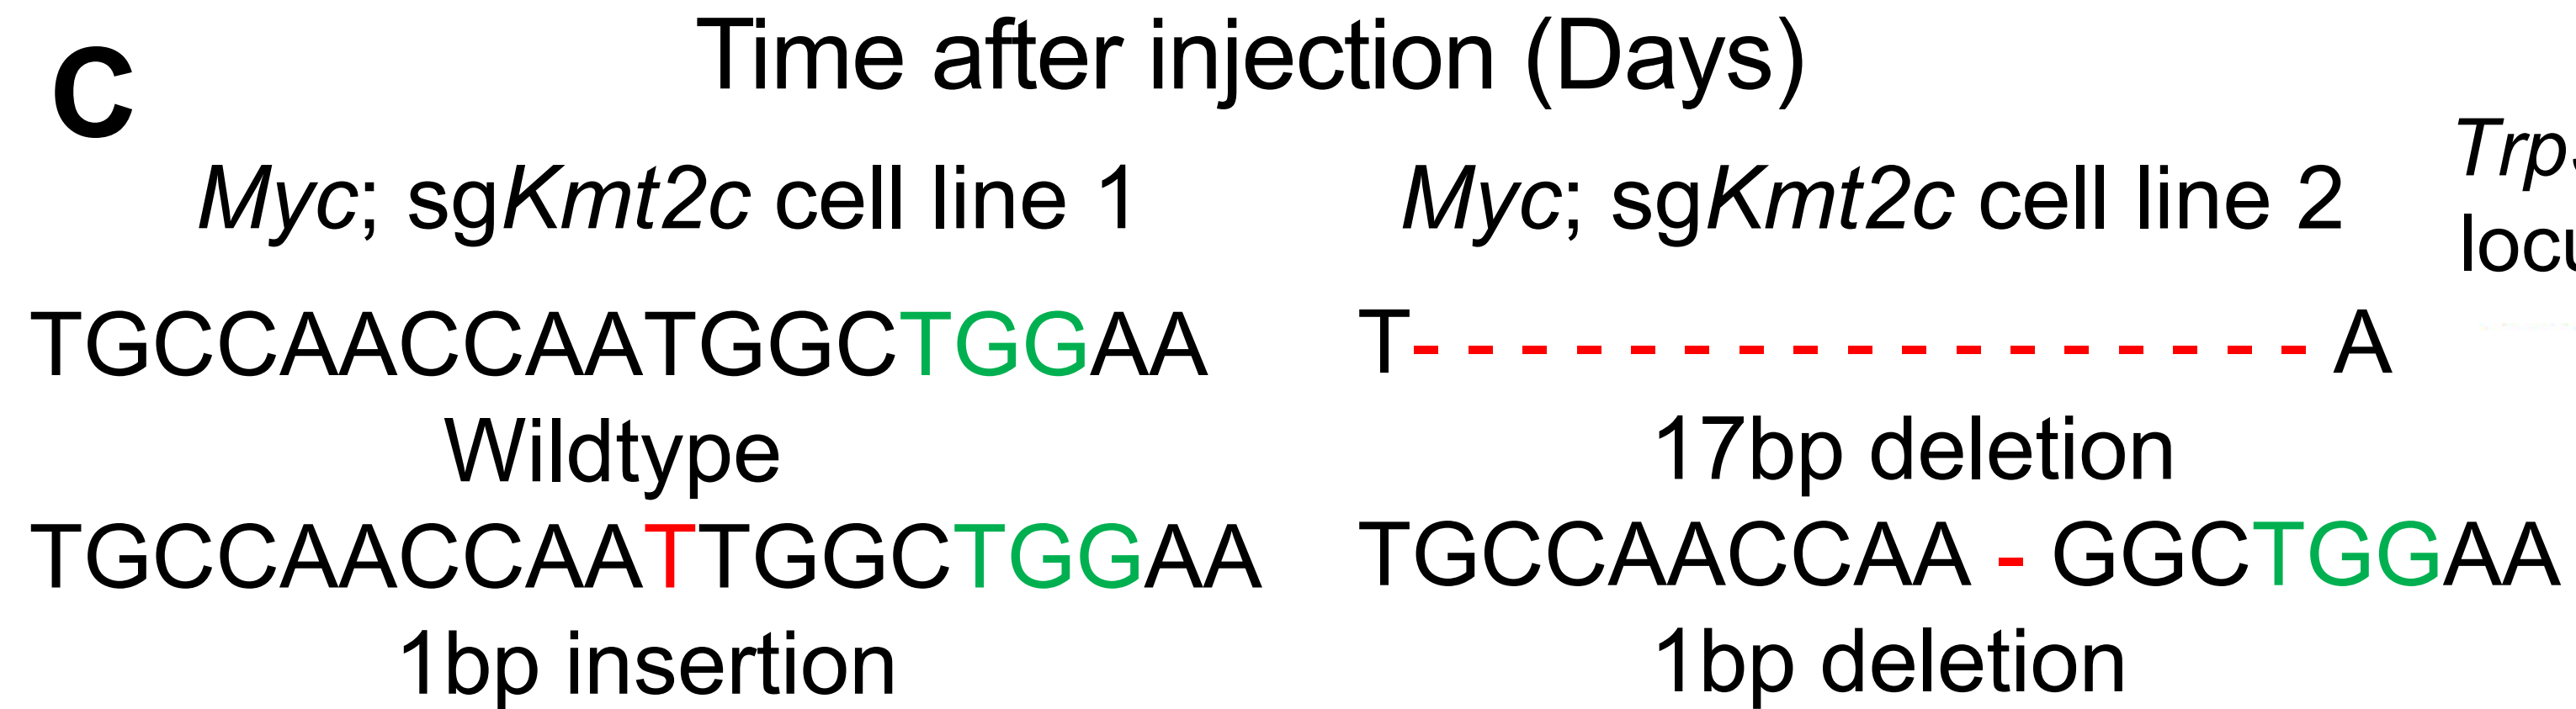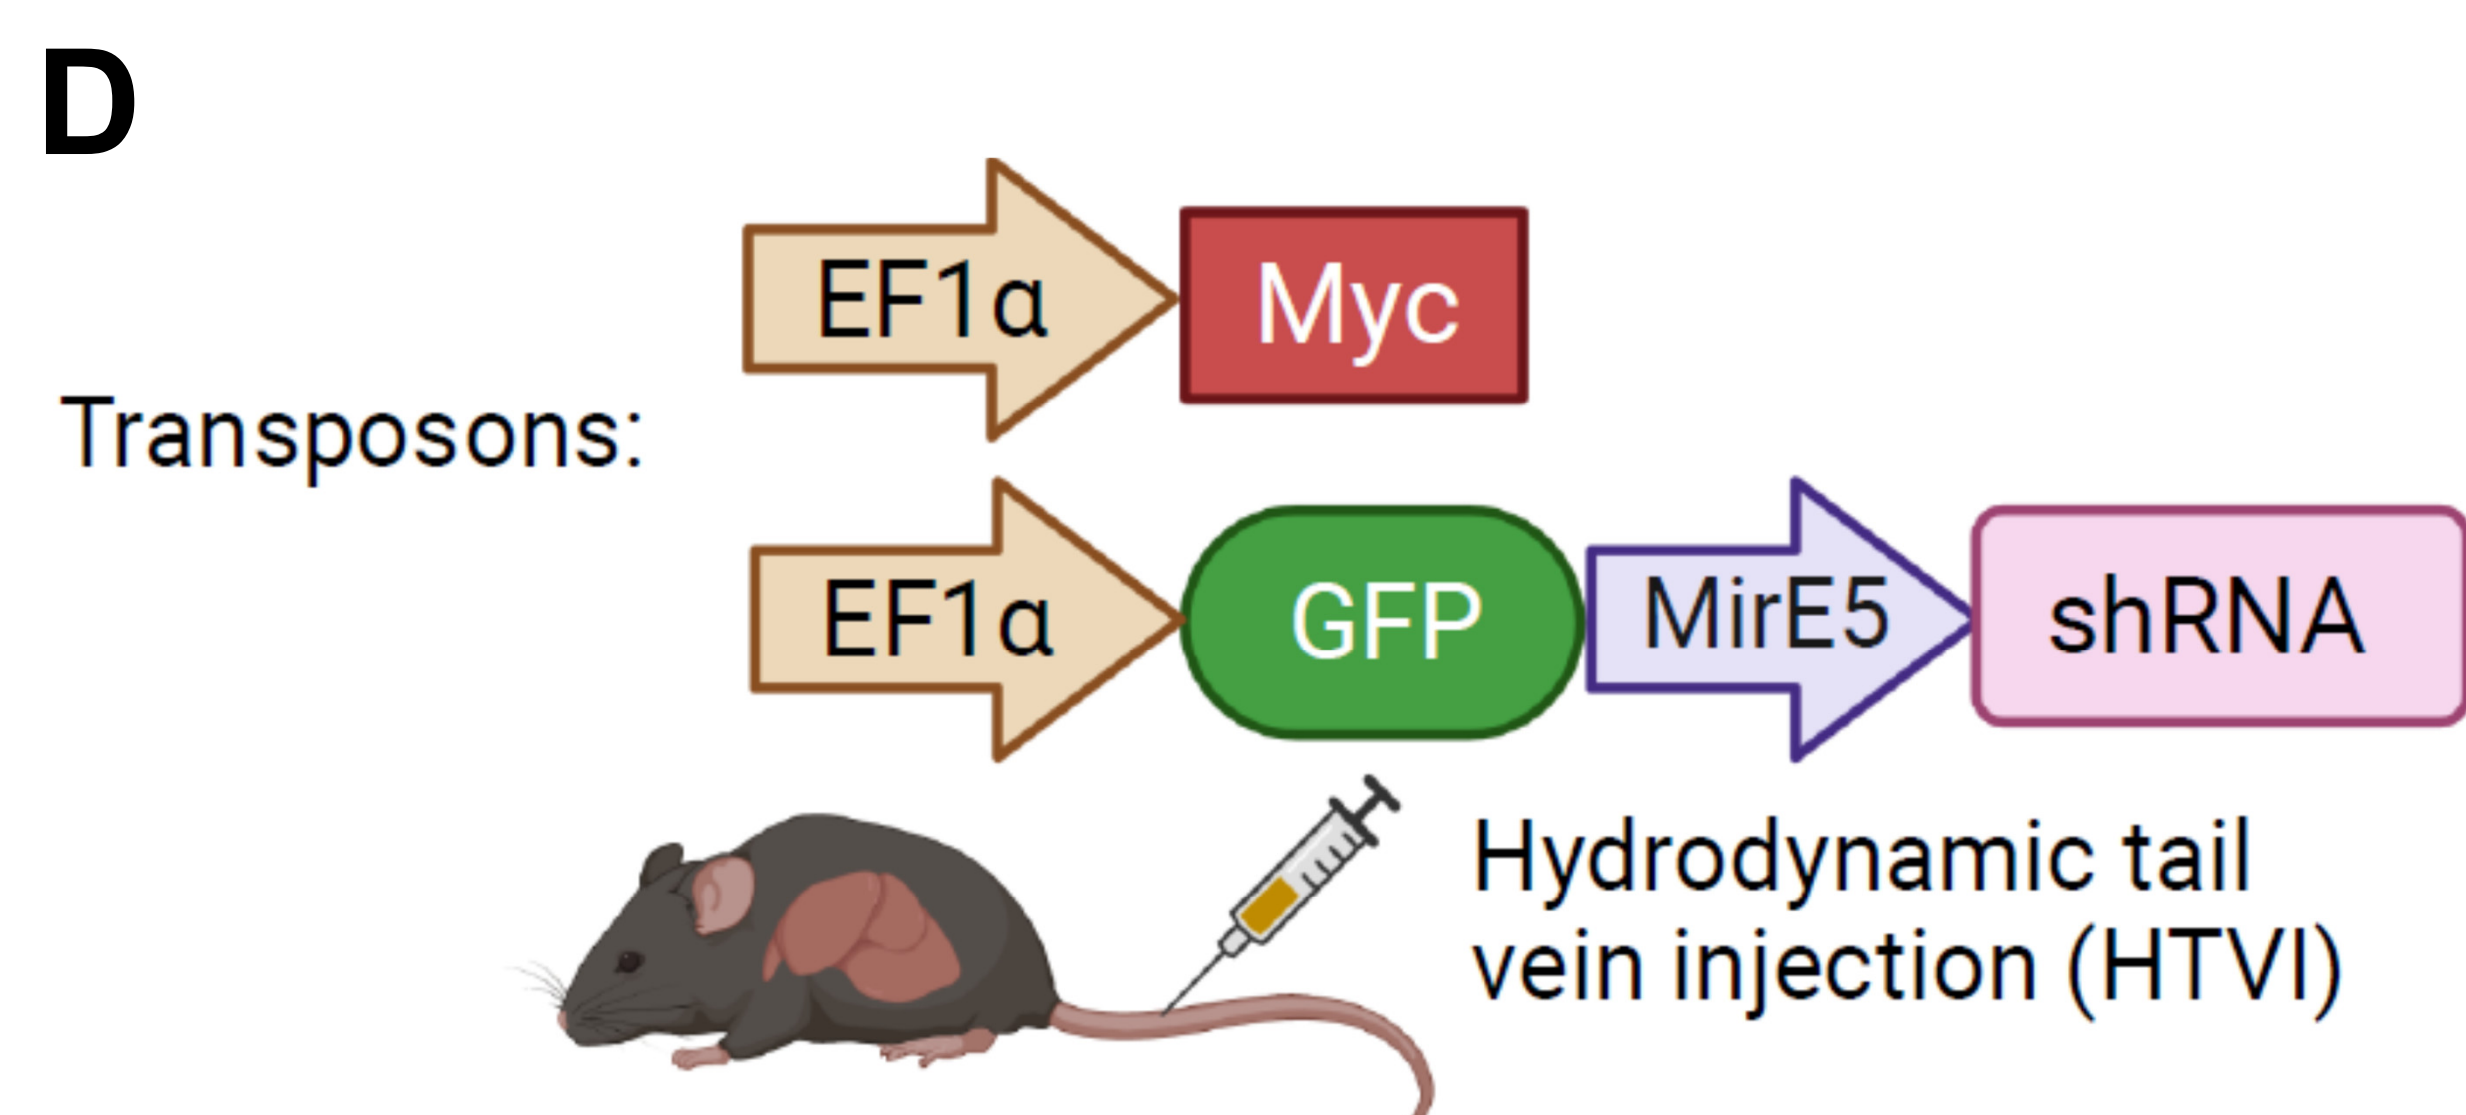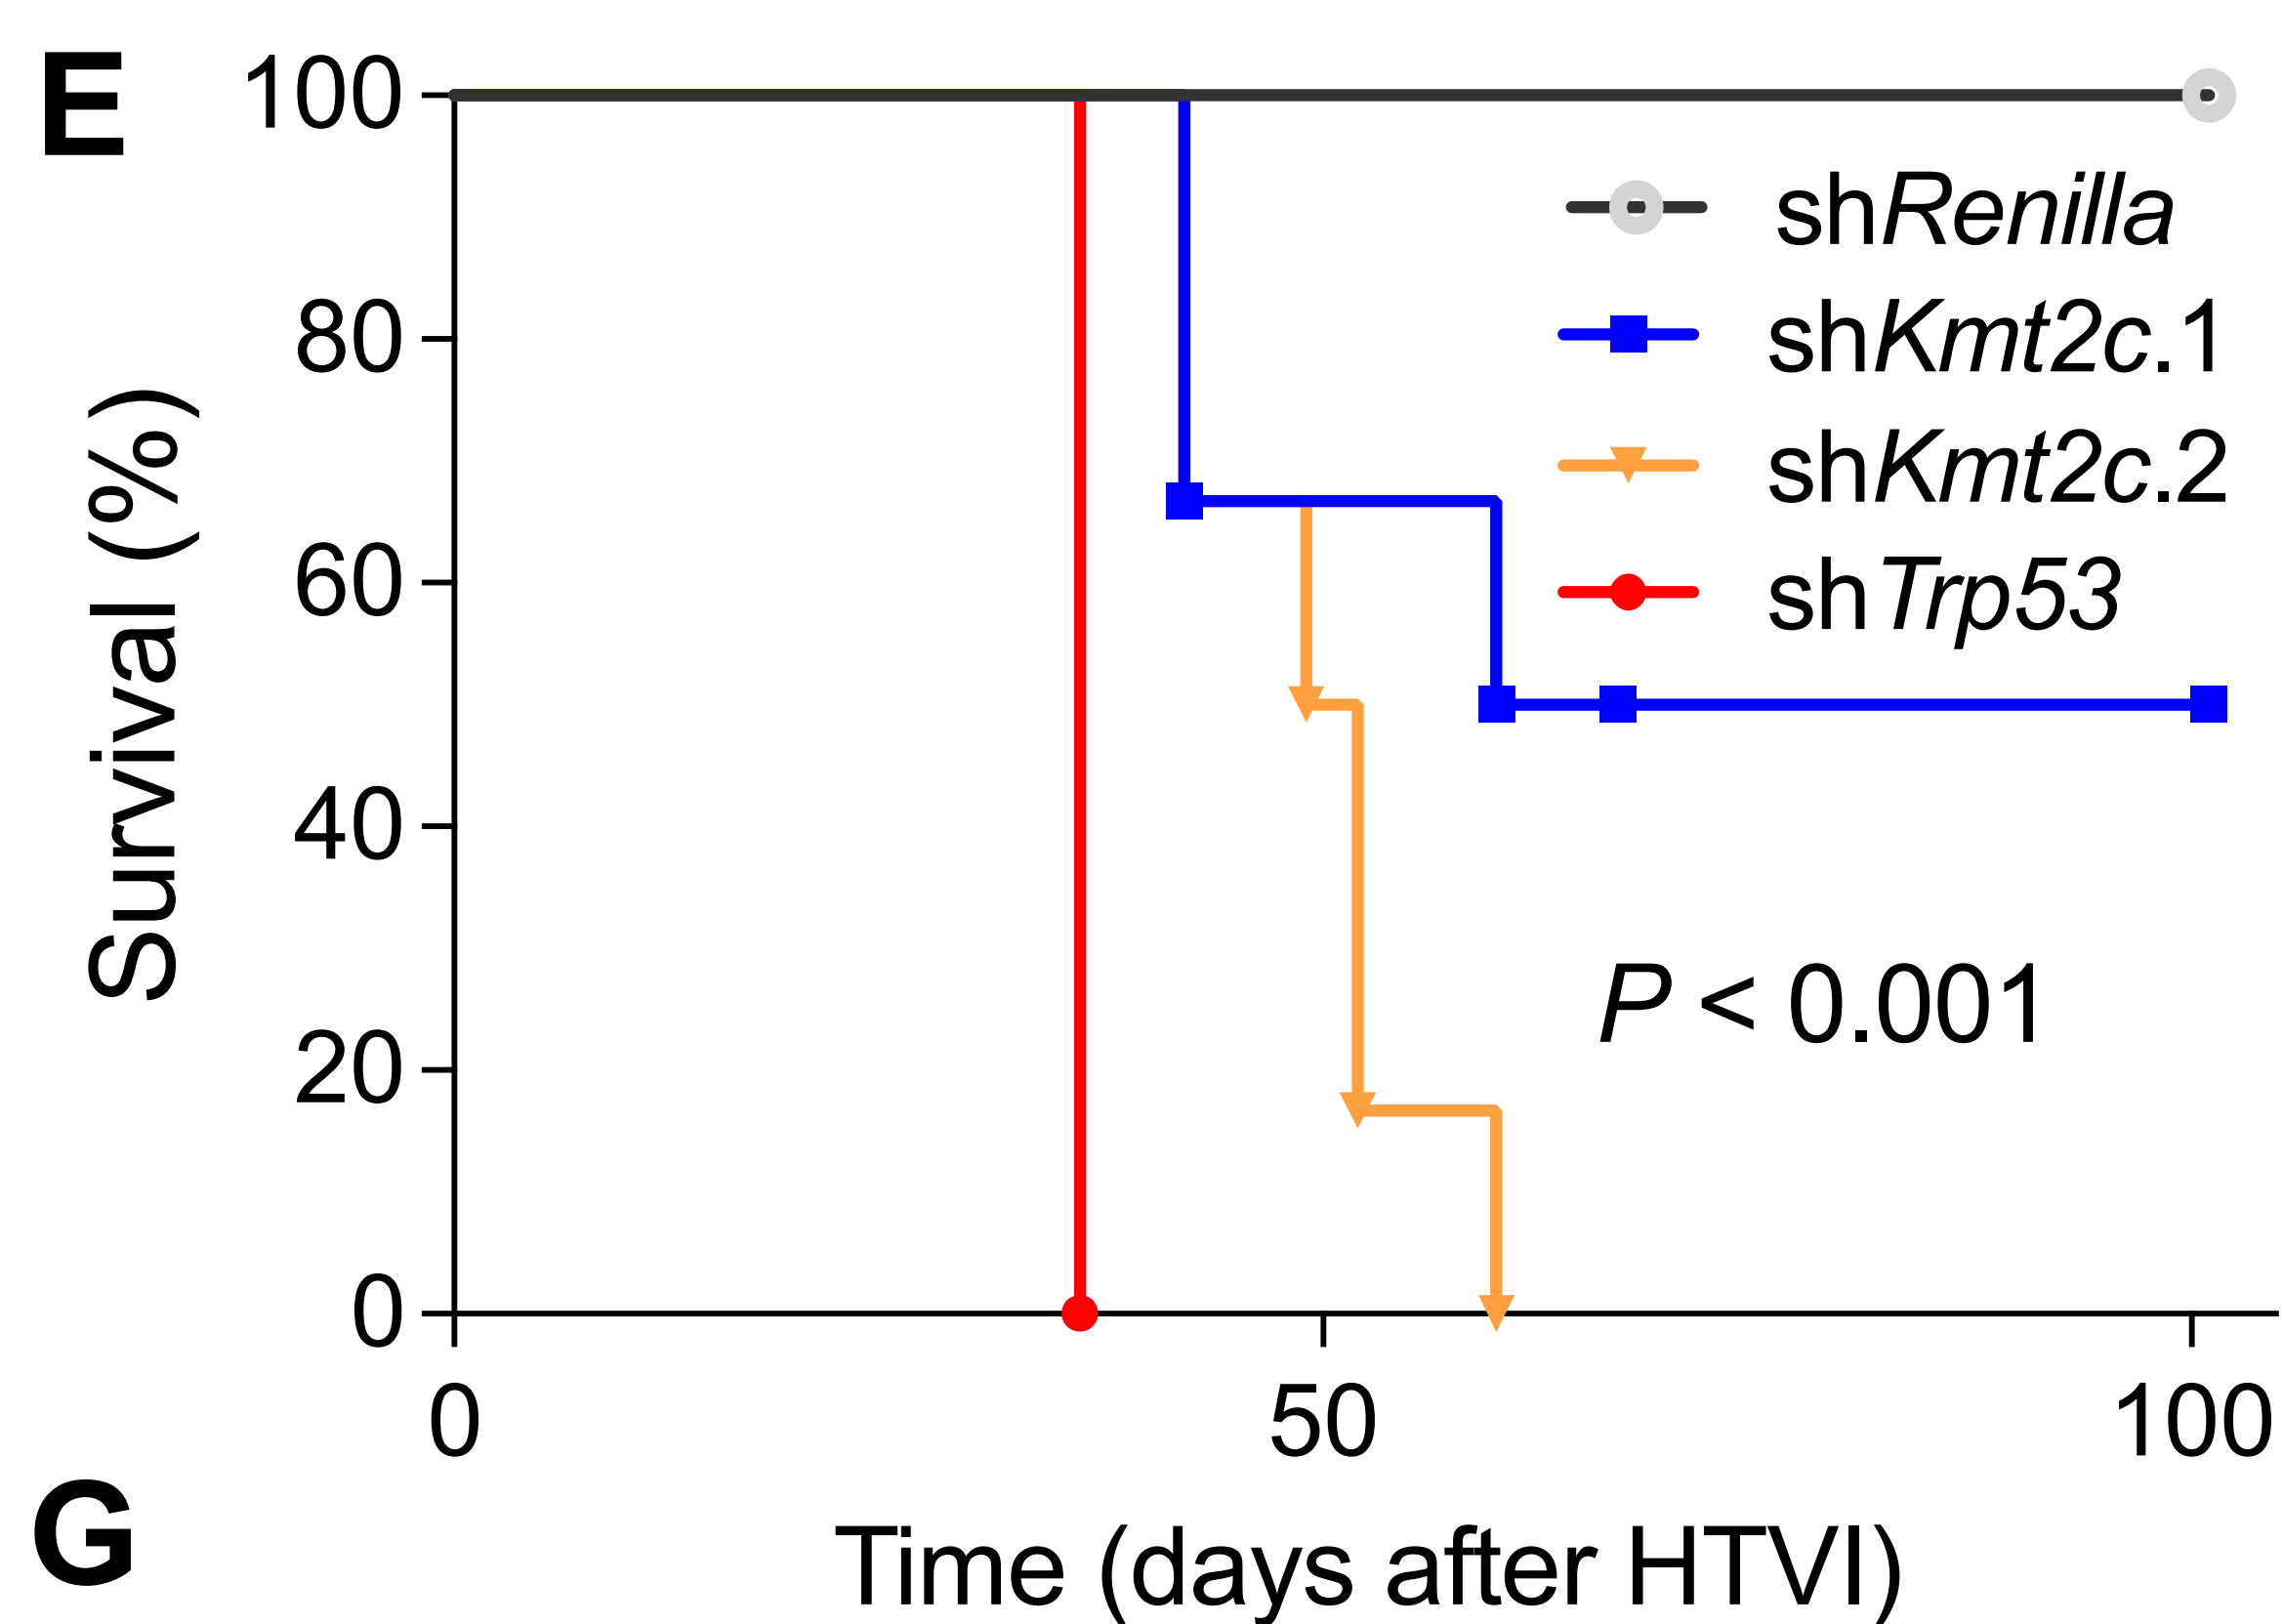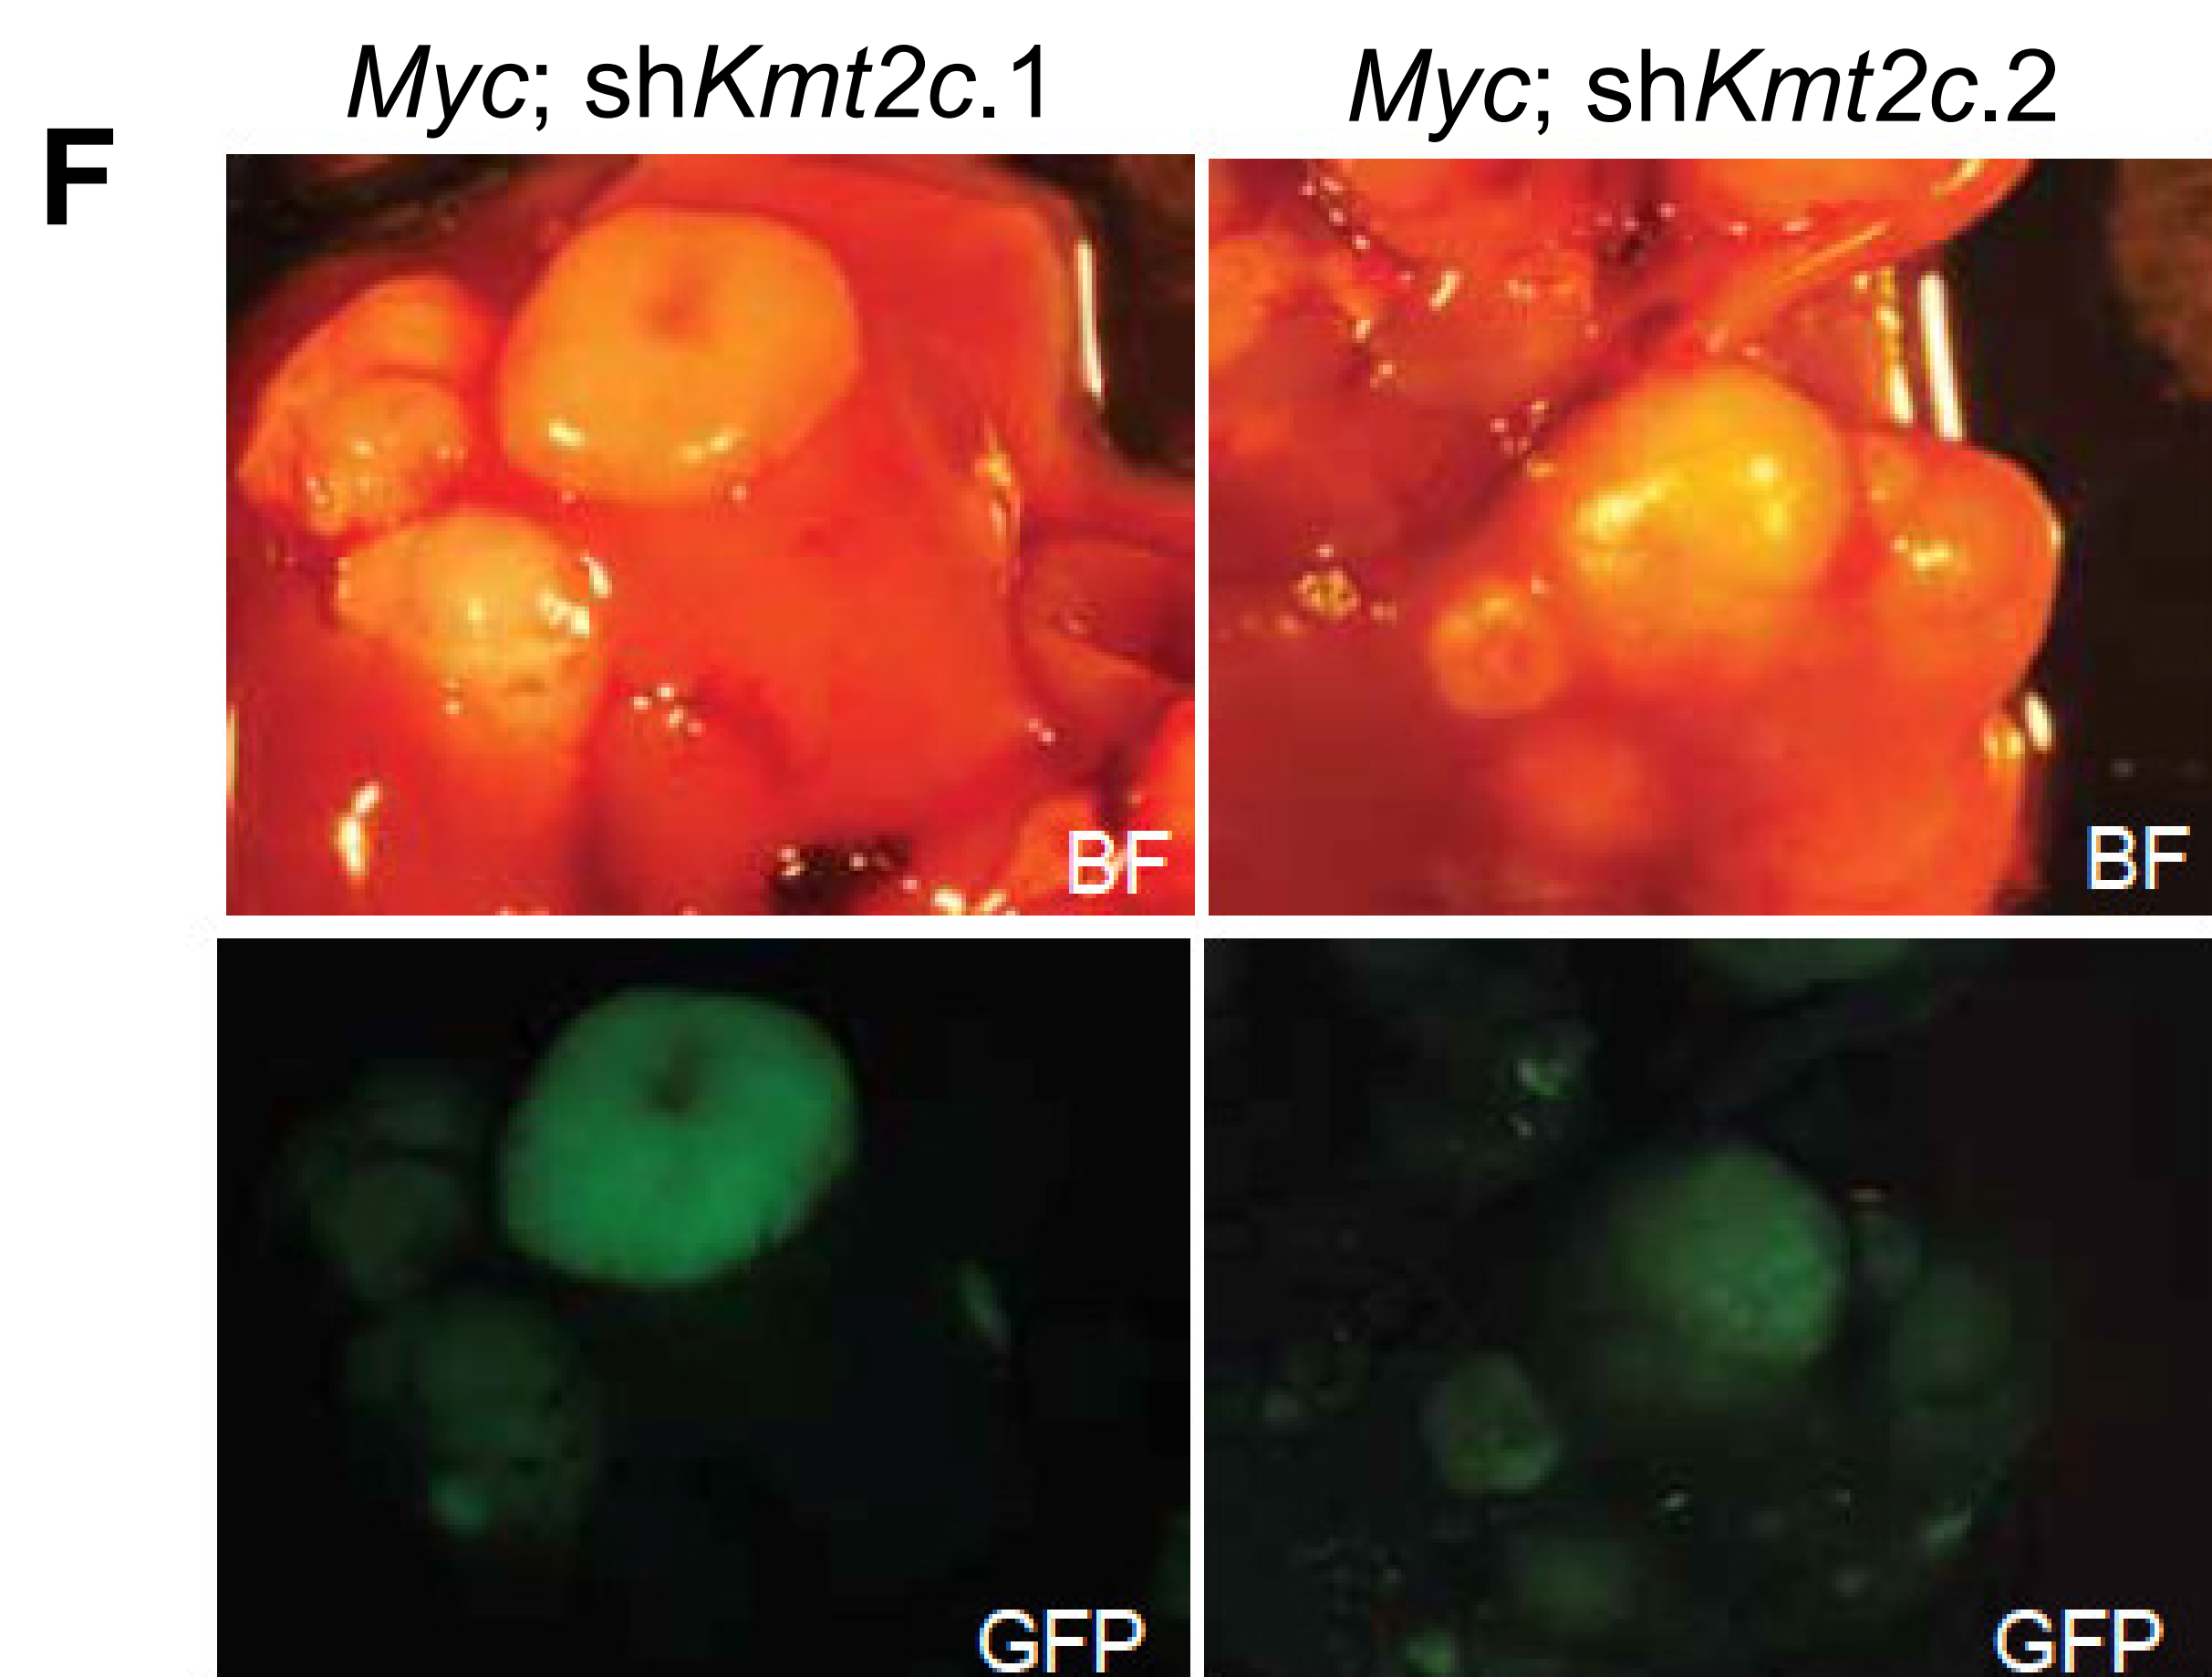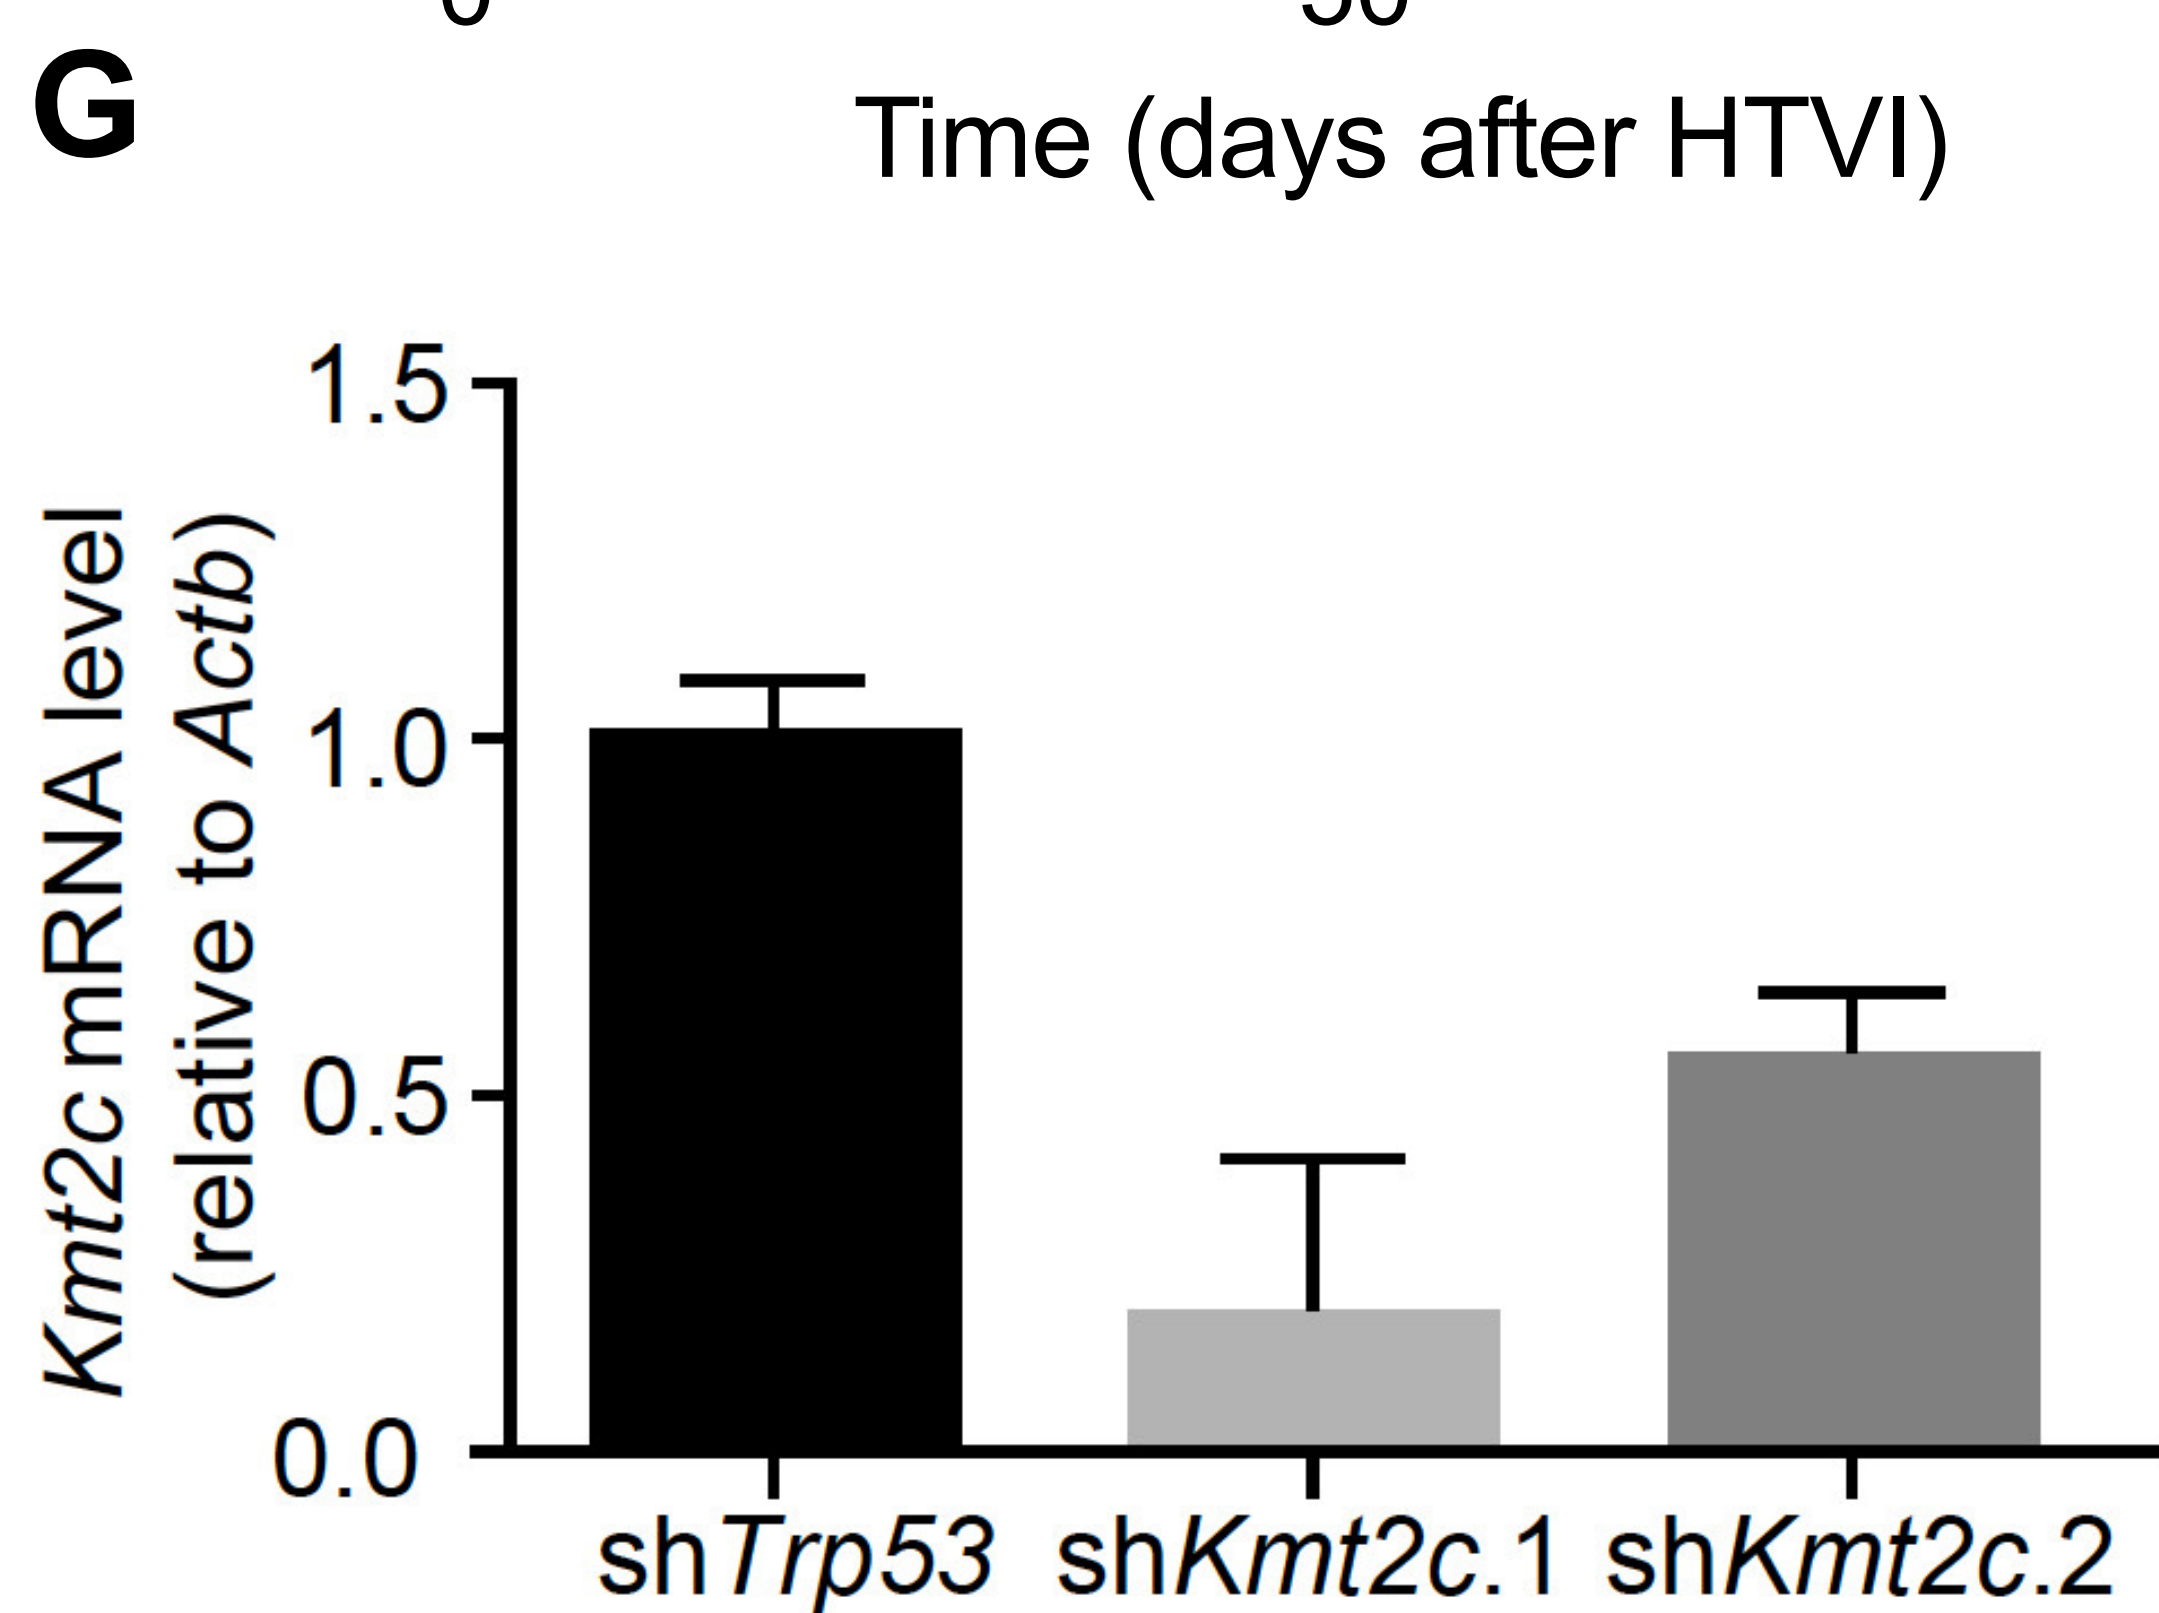

Supplement: supp [file elife-80854-supp-v1.zip]

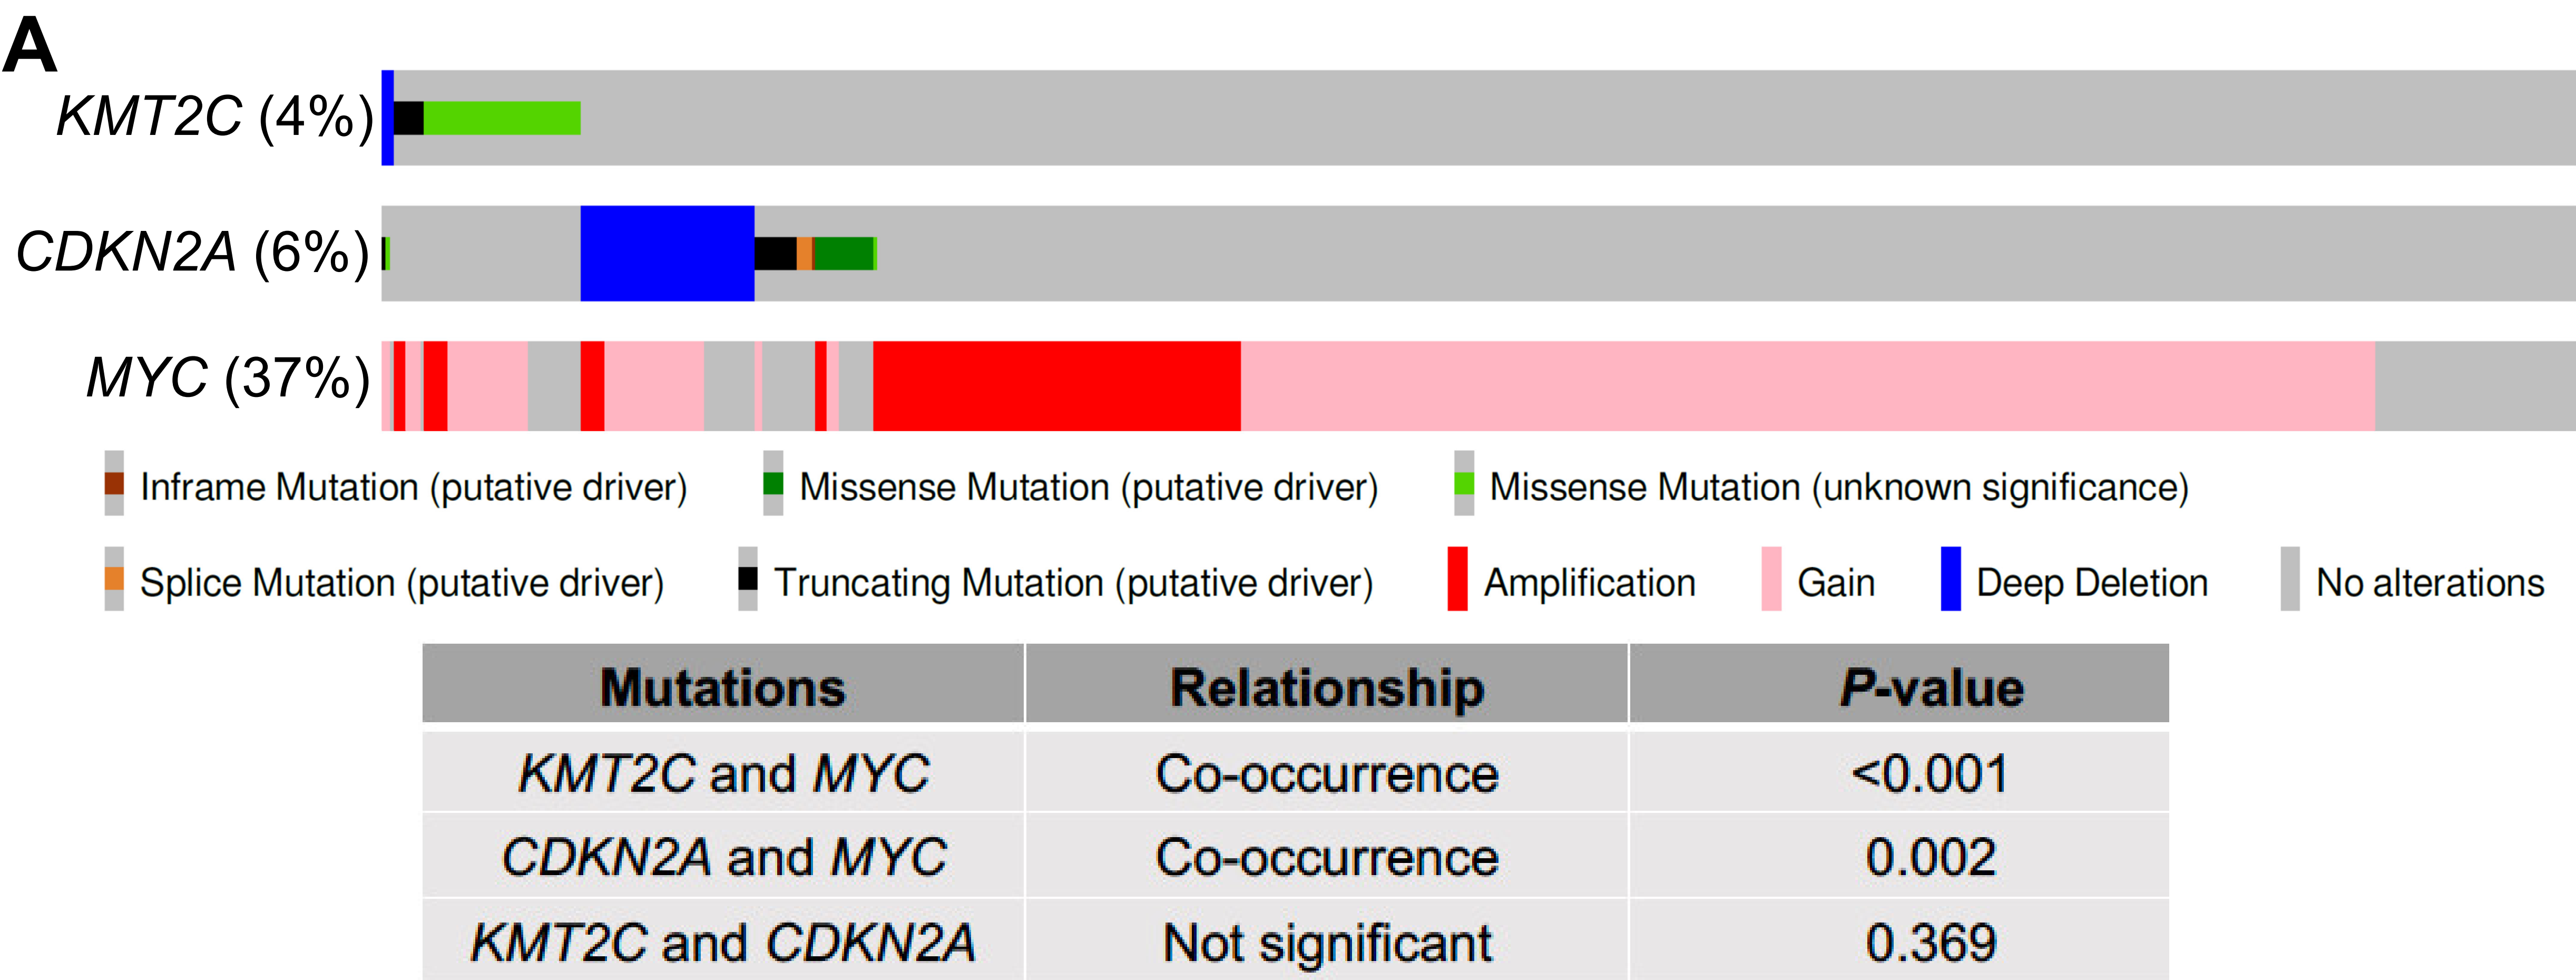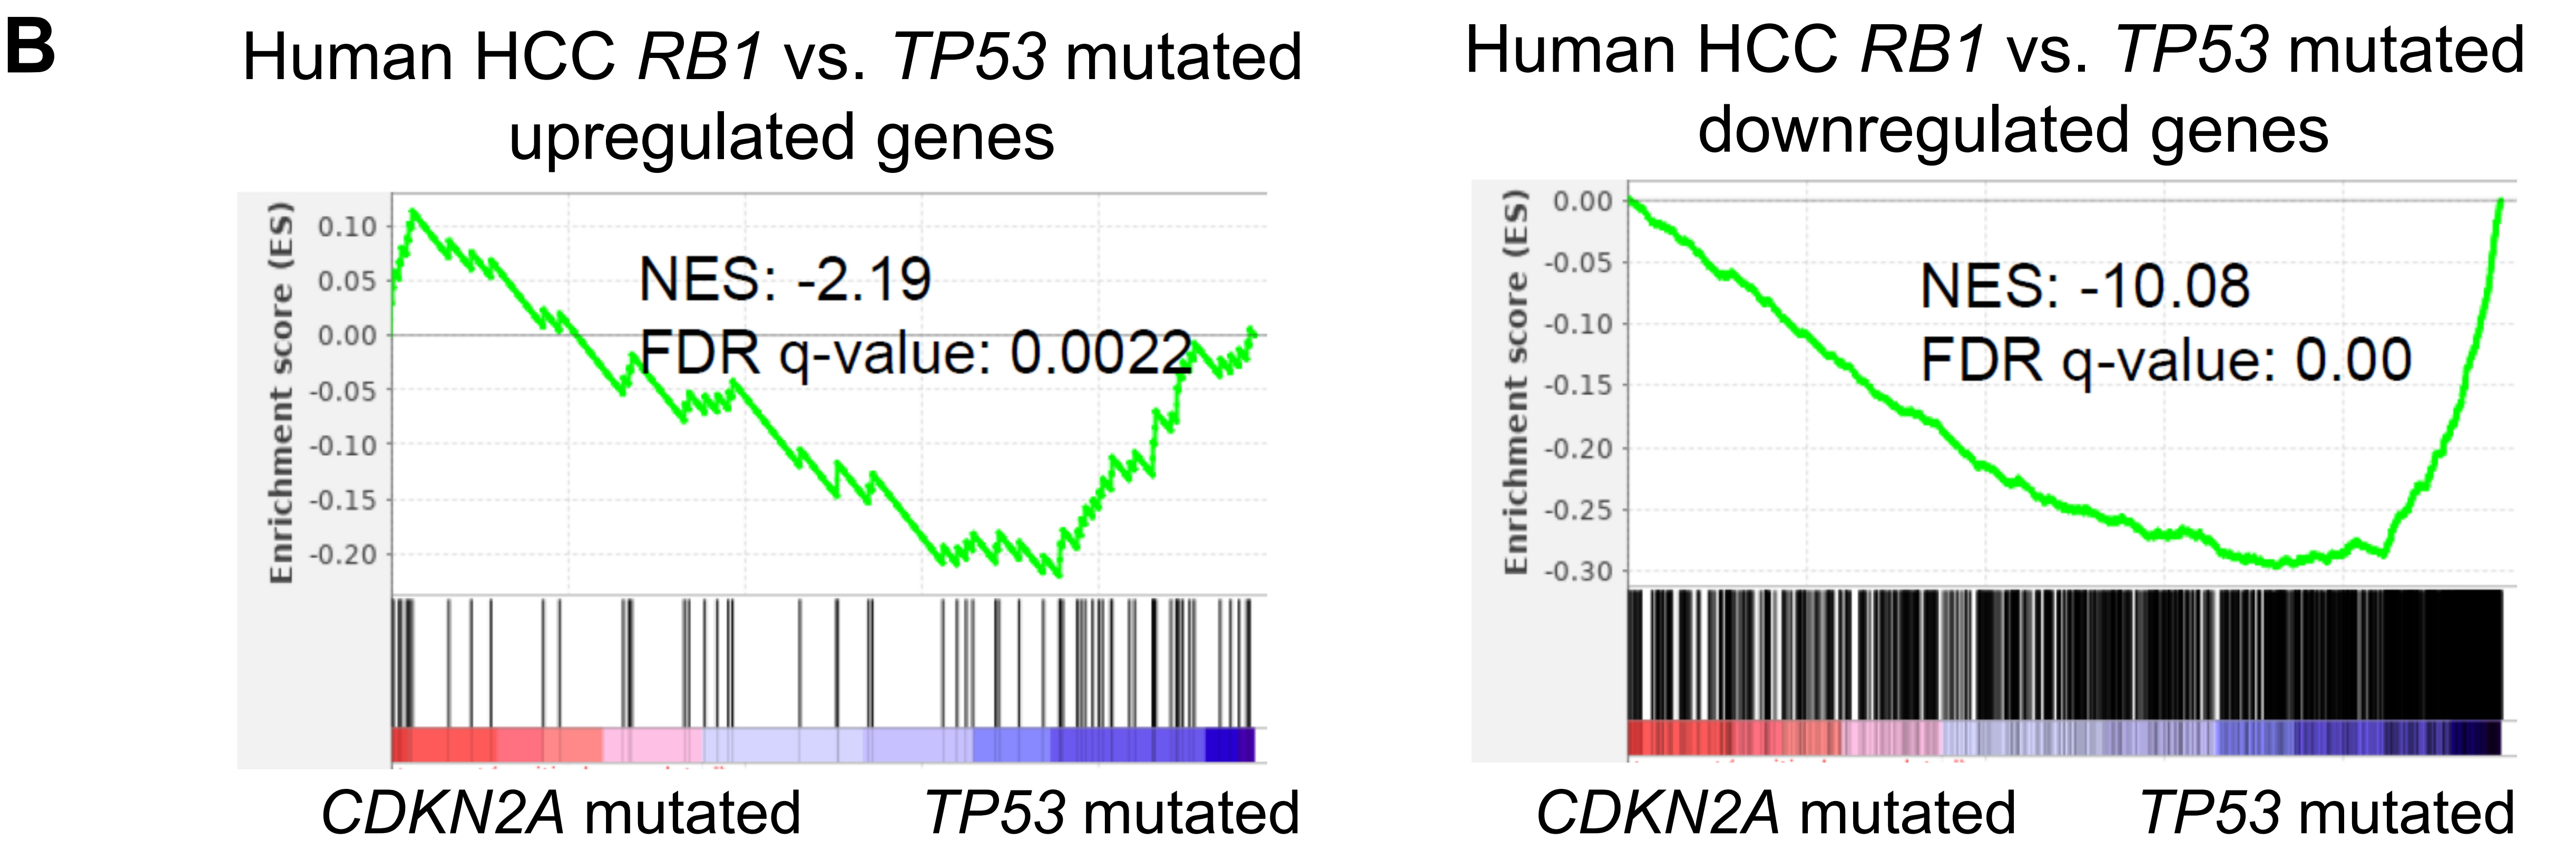

Supplement: supp [file elife-80854-supp-v1.zip]

**A**

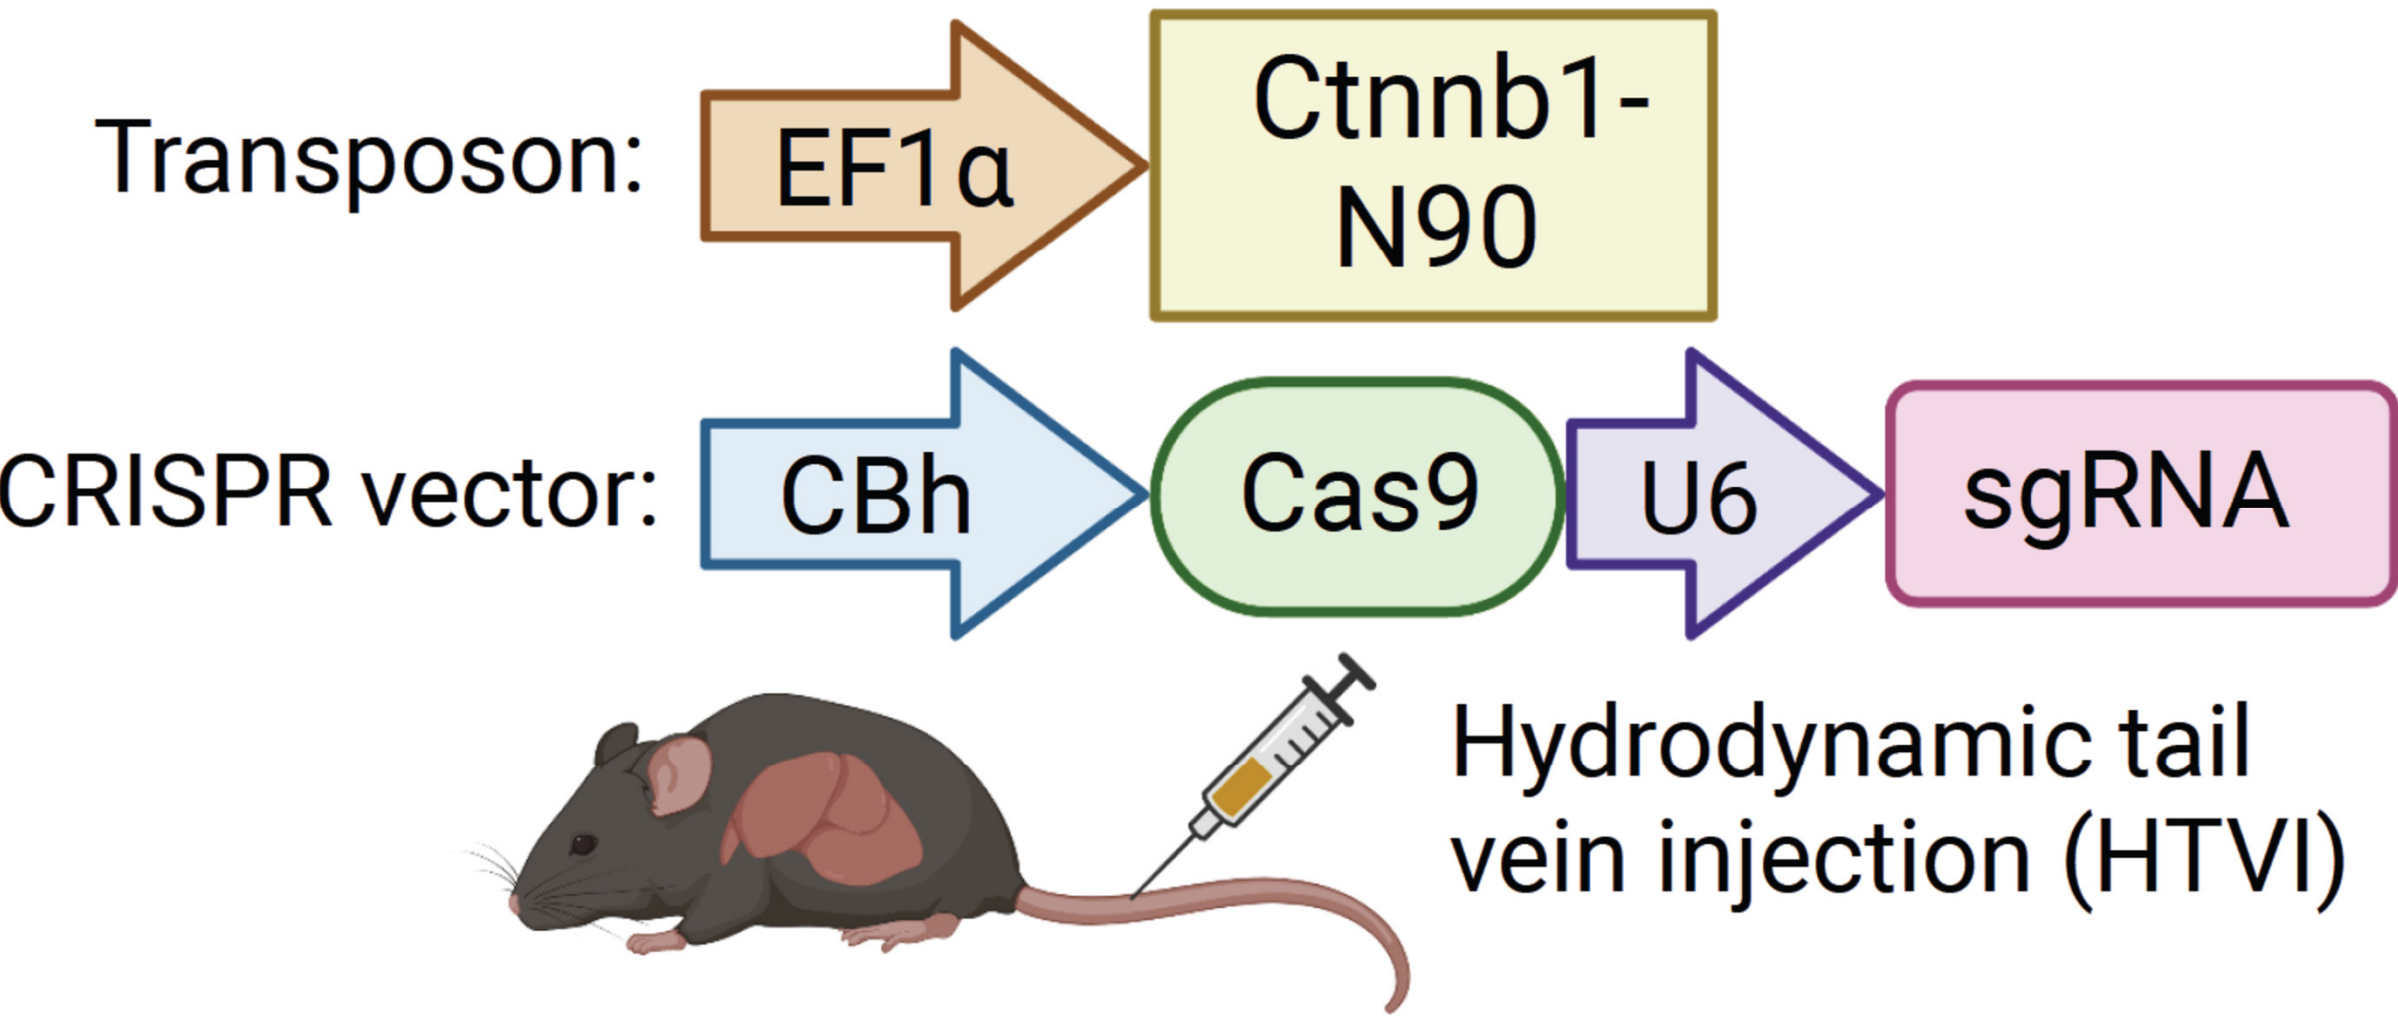

**B**

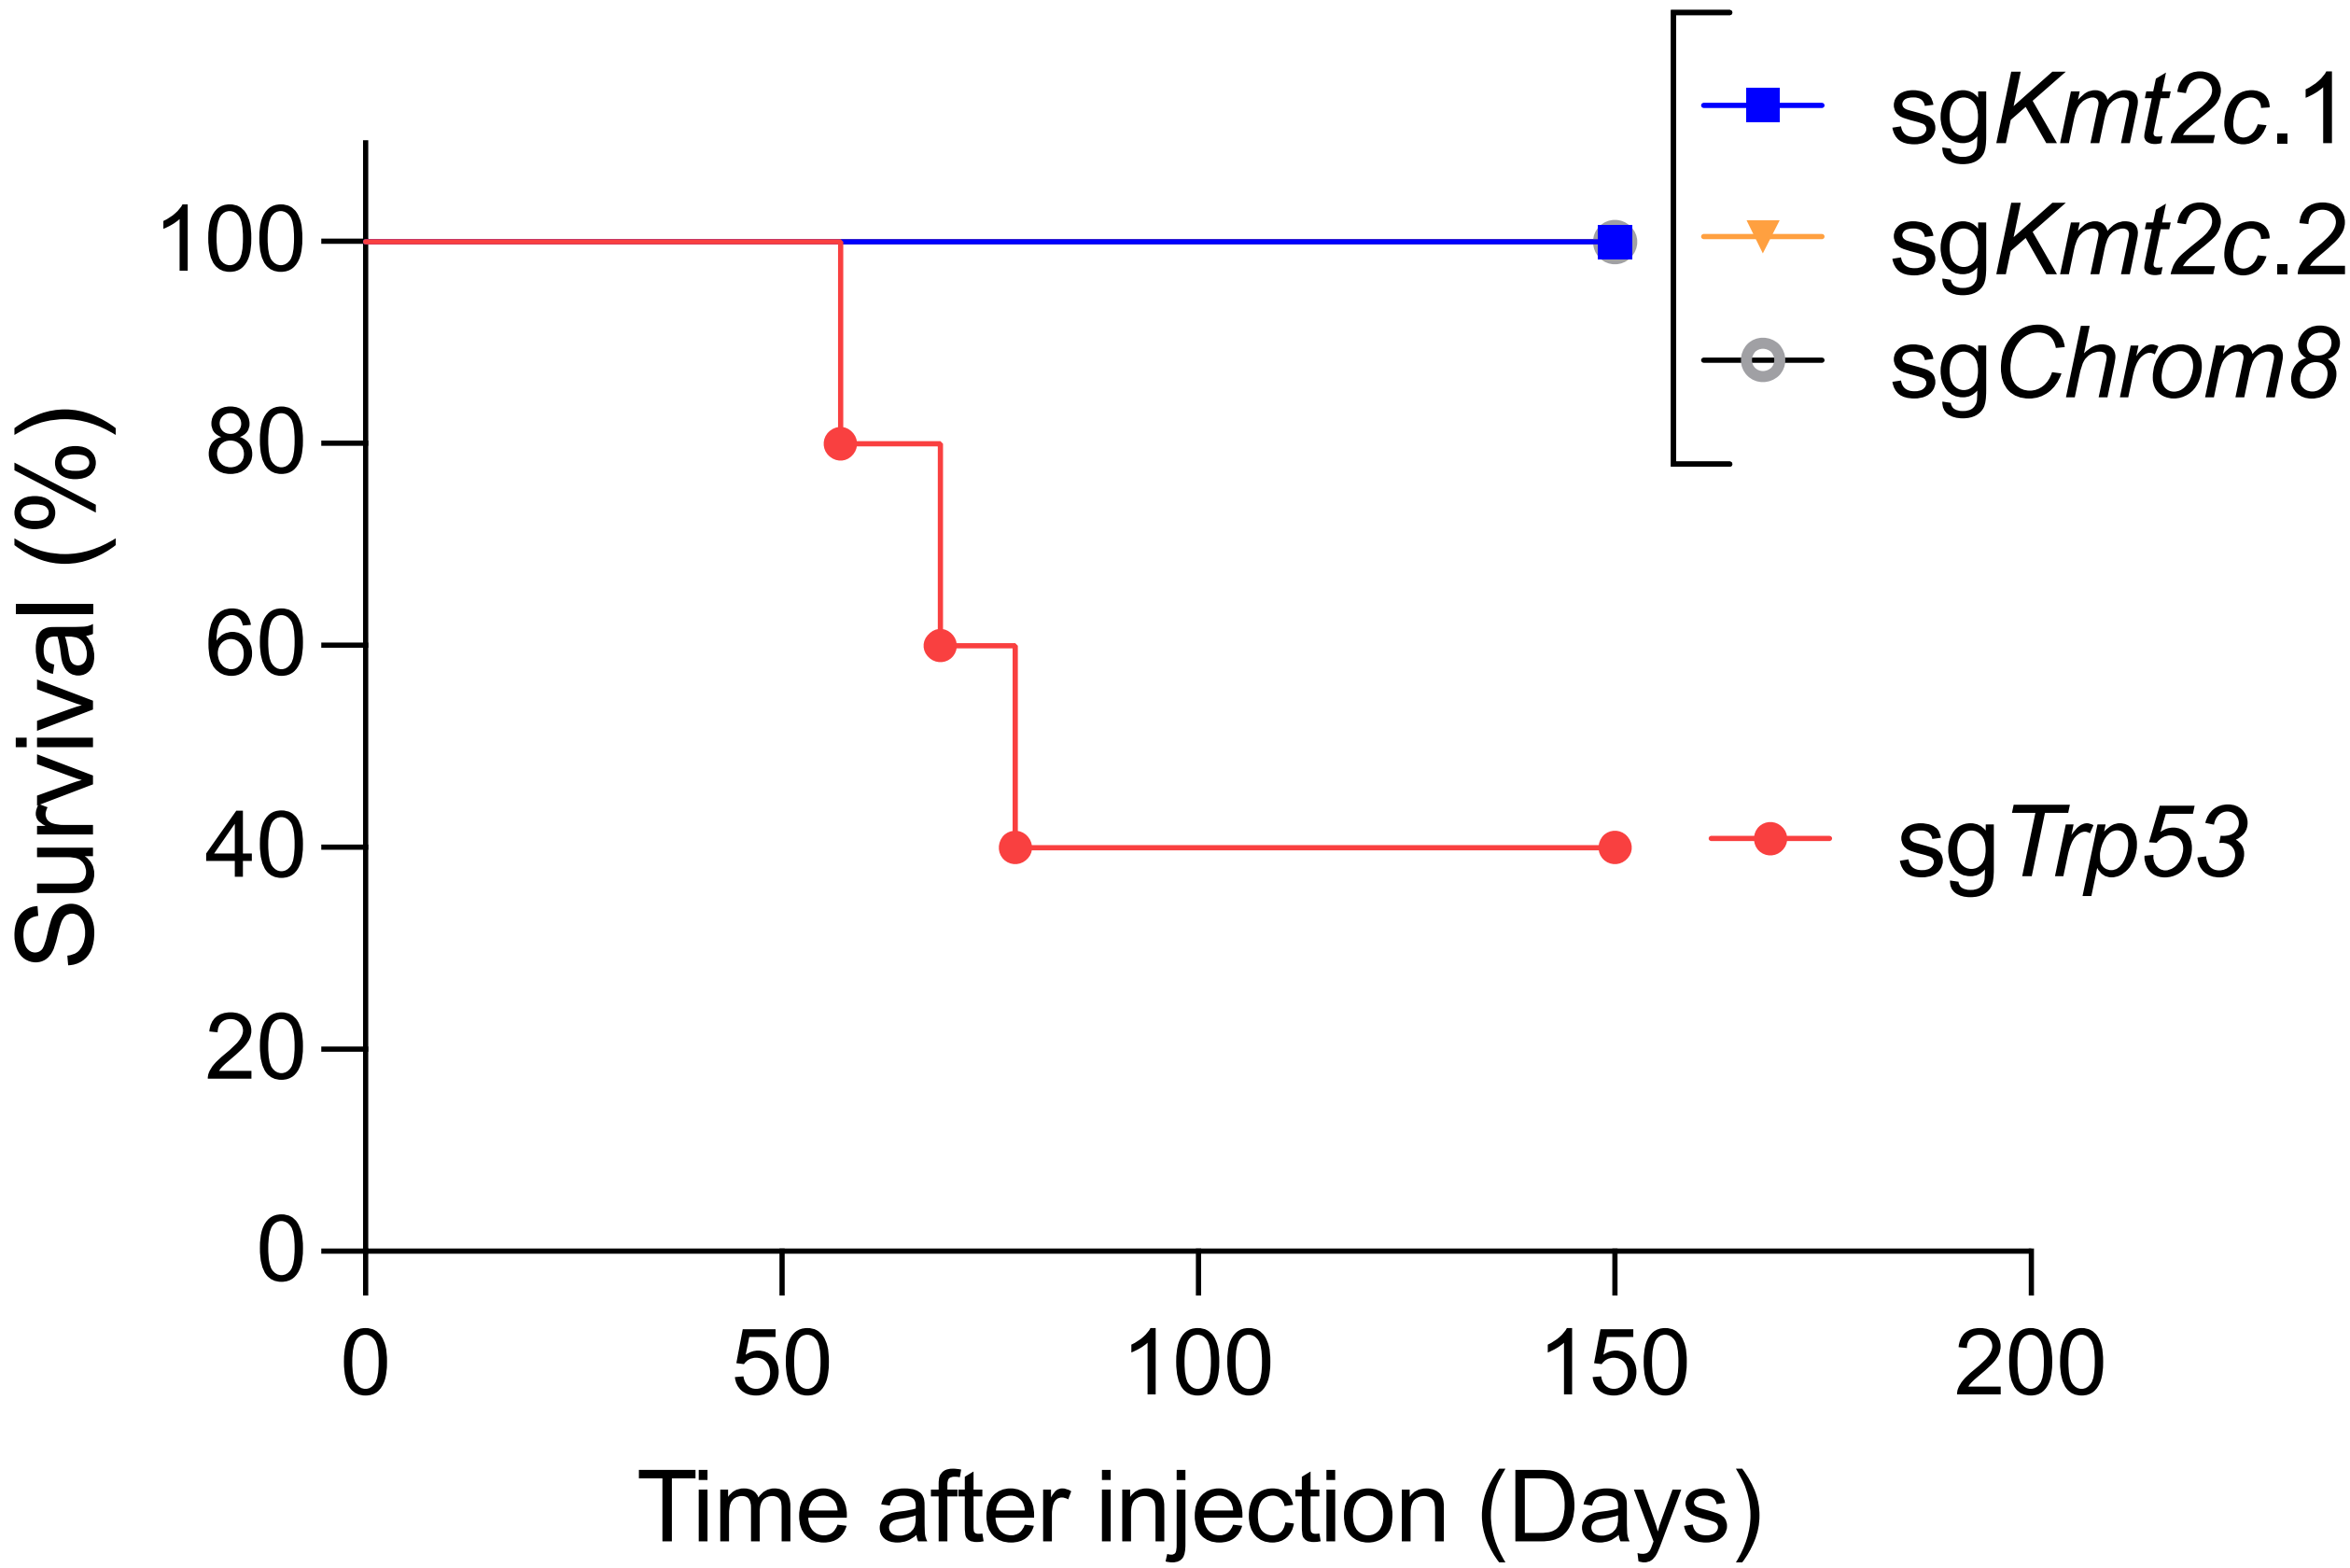

Supplement: supp [file elife-80854-supp-v1.zip]

**A**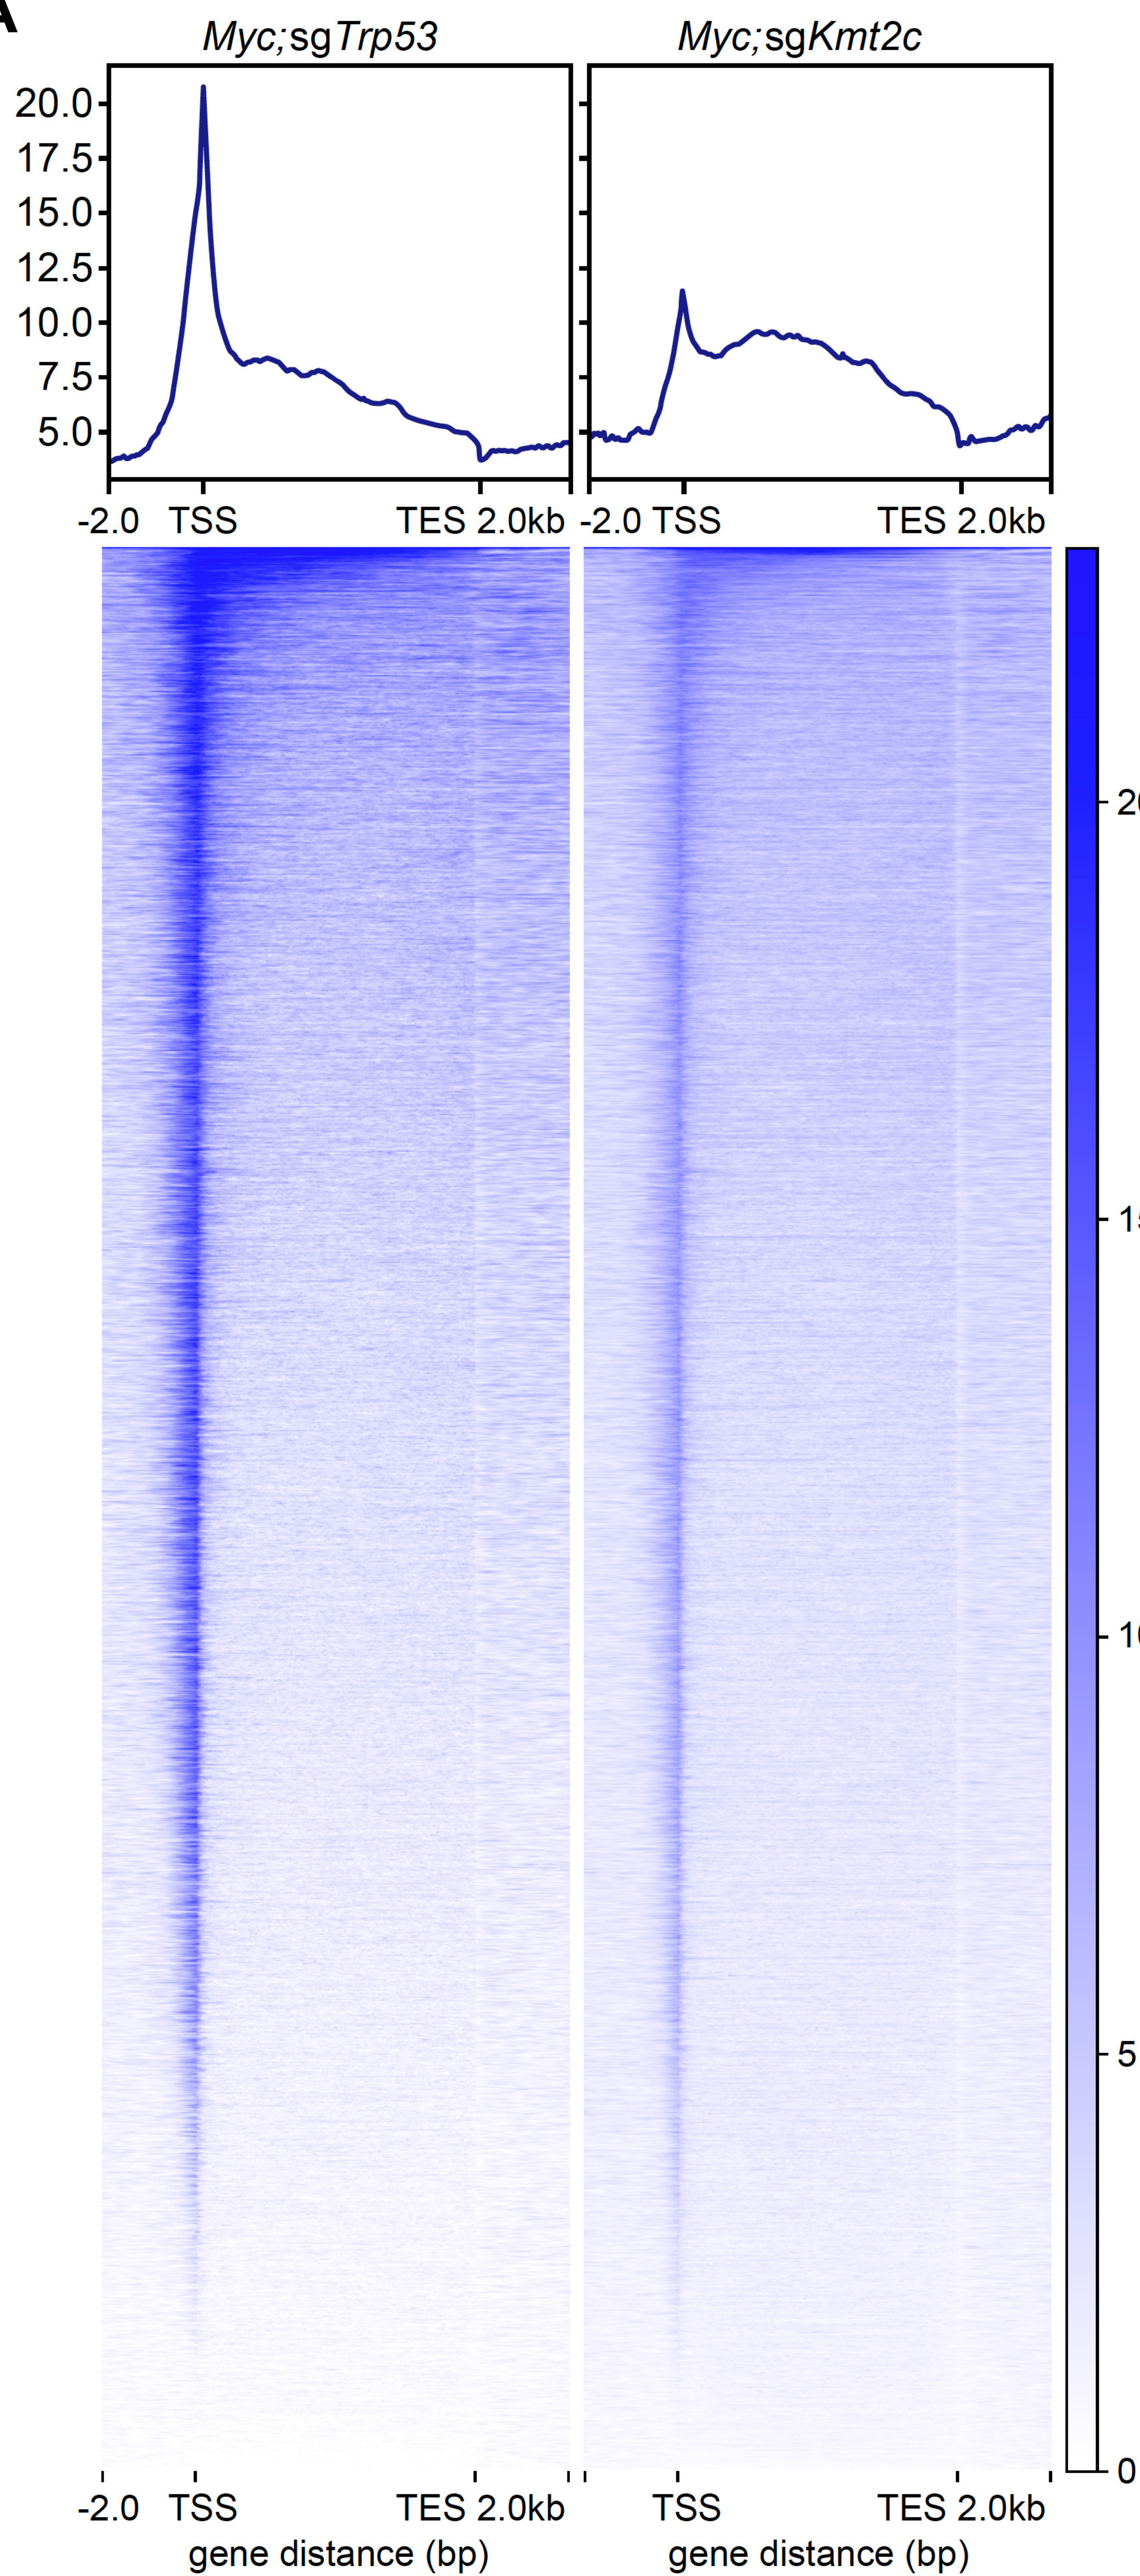**B**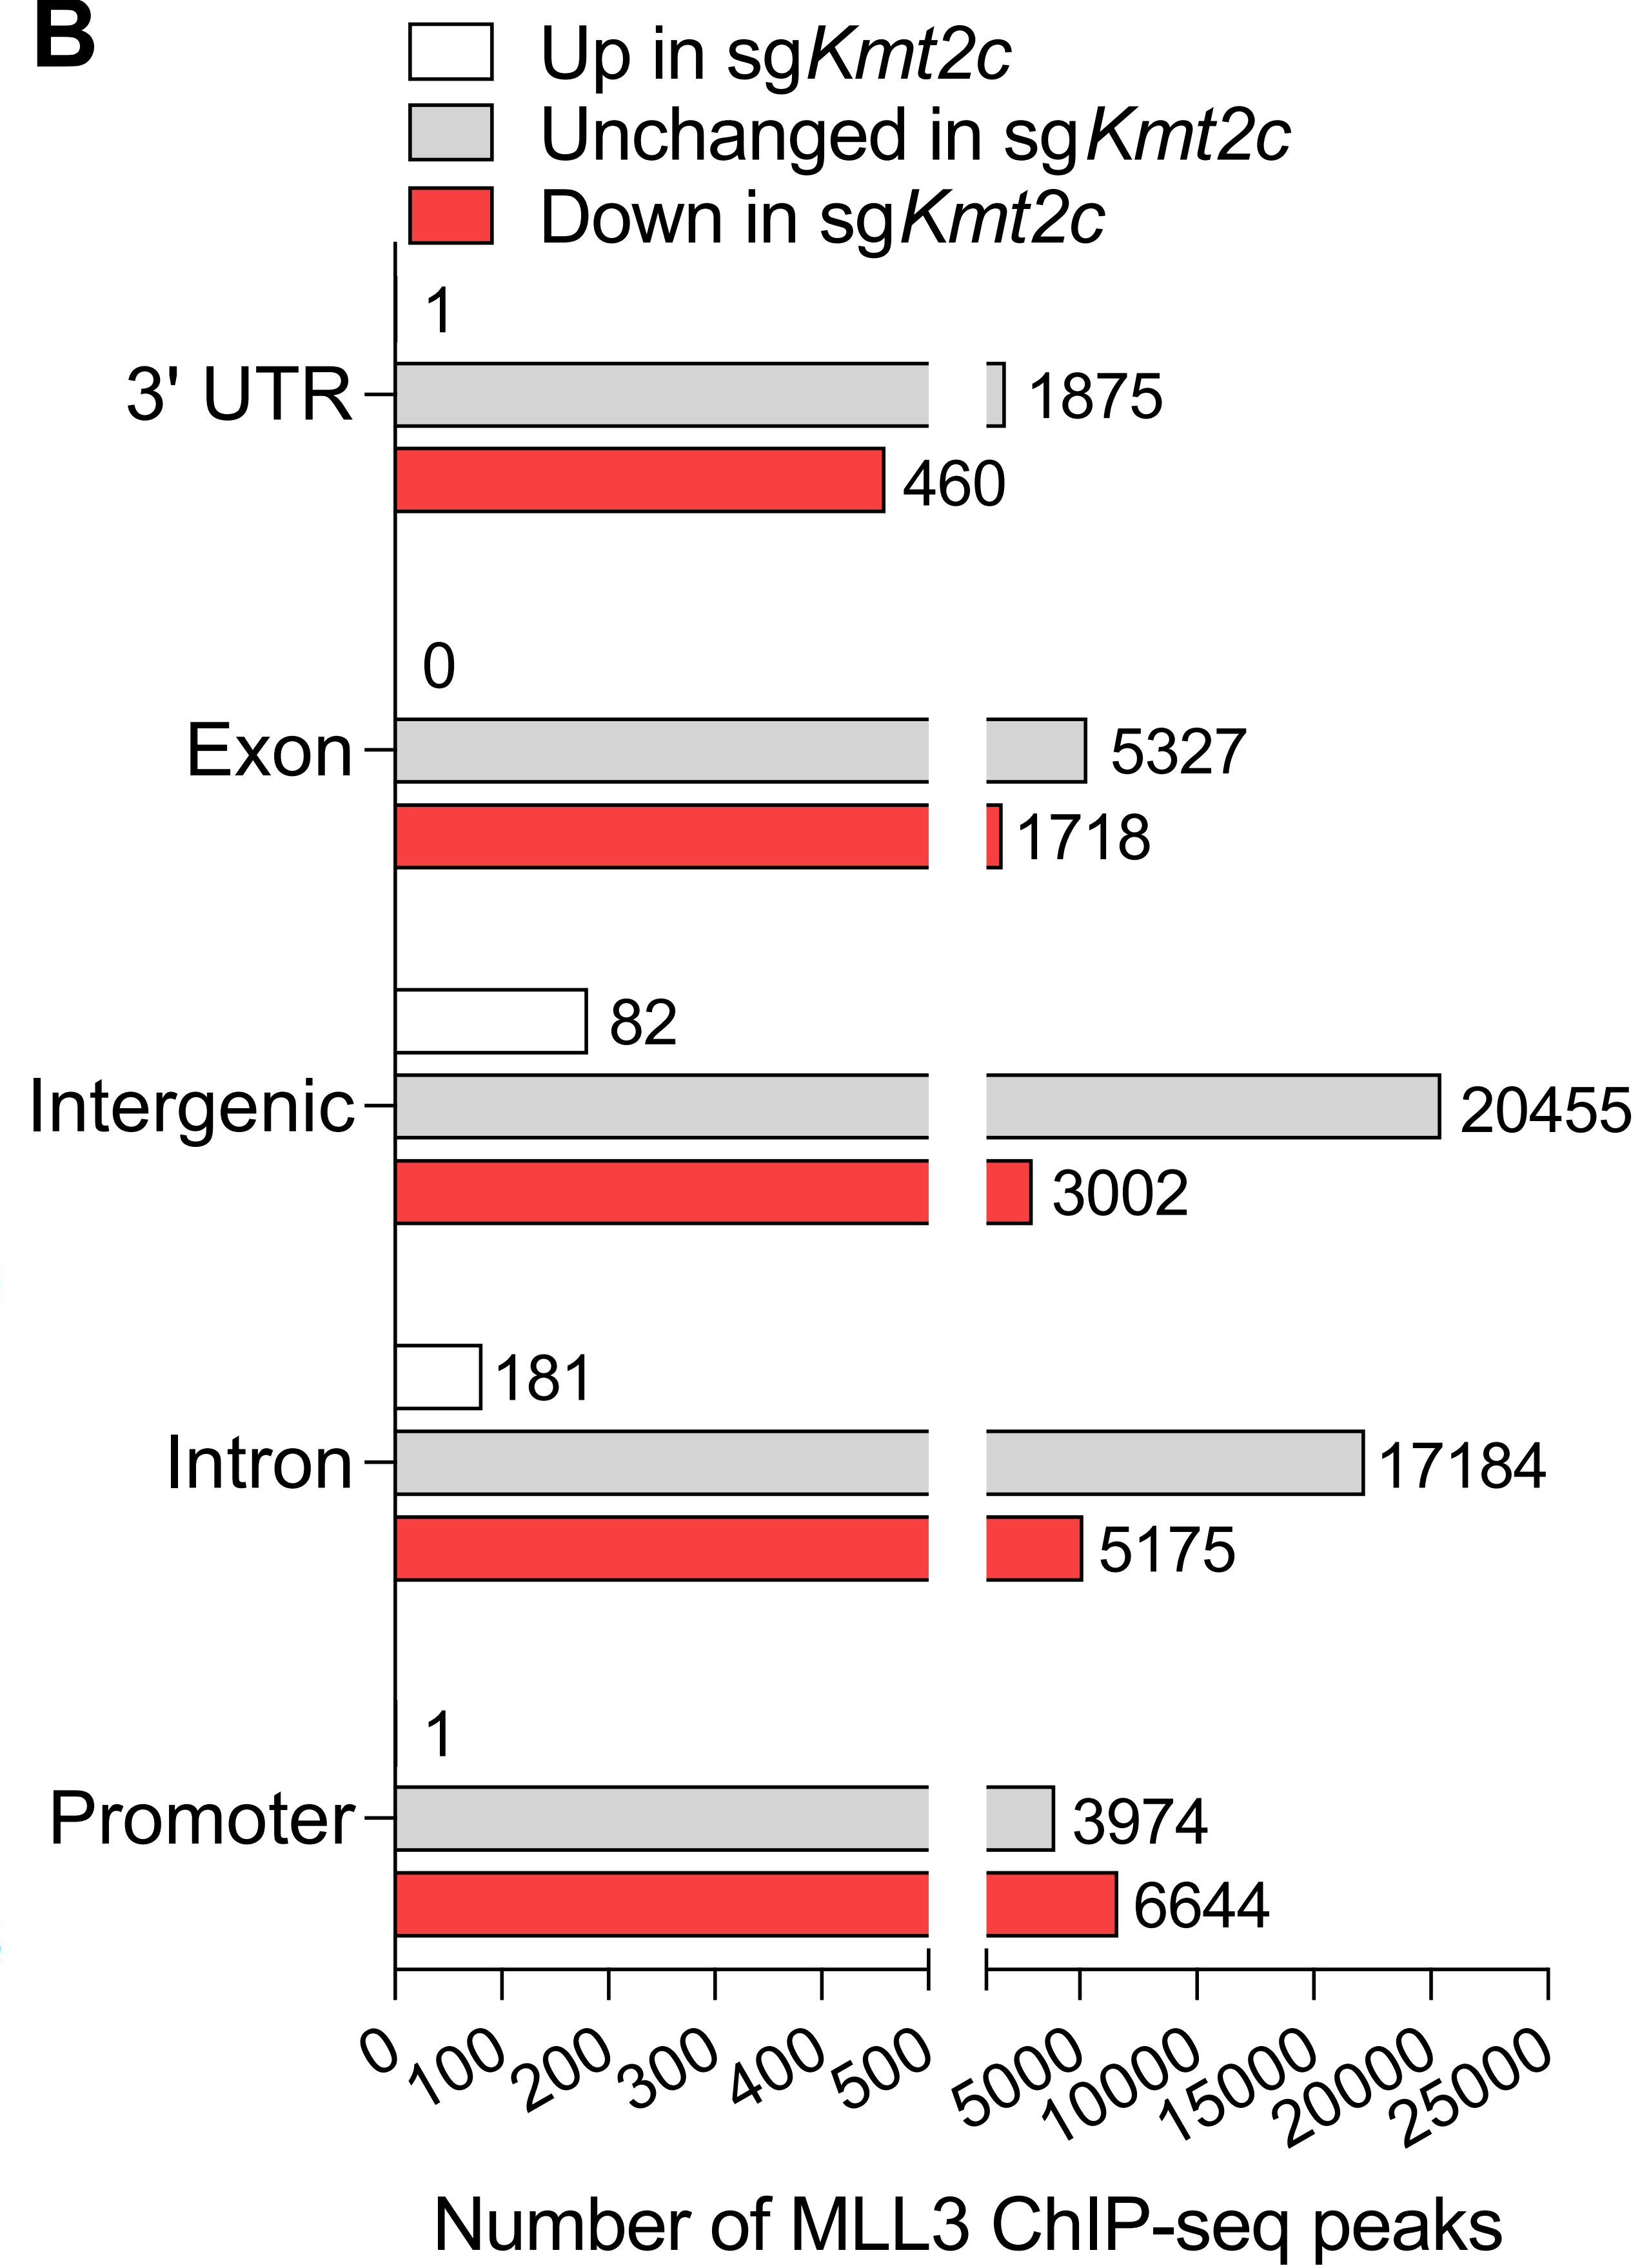

Supplement: supp [file elife-80854-supp-v1.zip]

**A**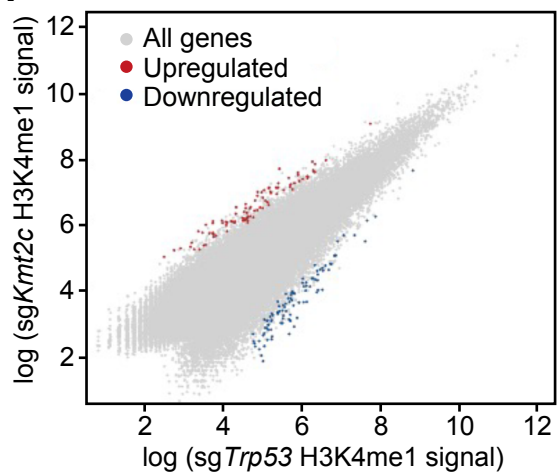**B**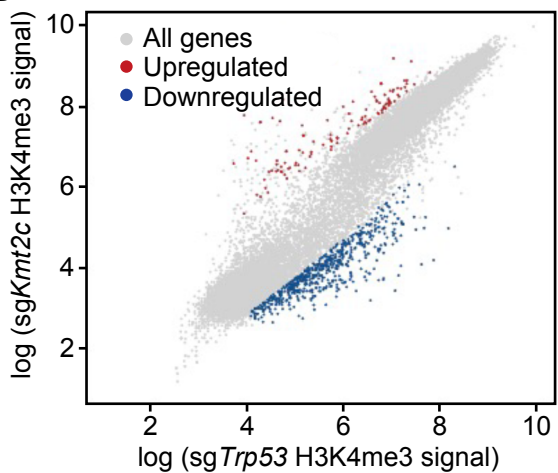**C**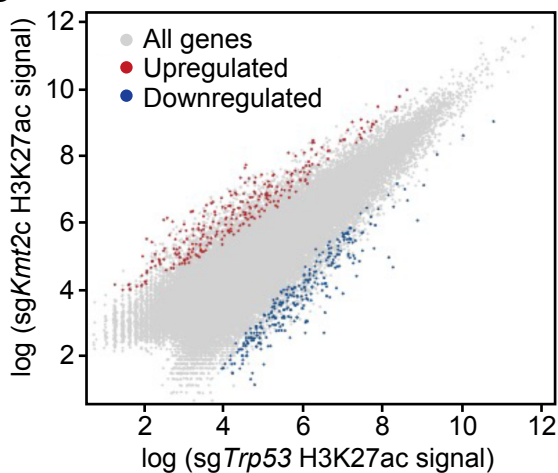**D**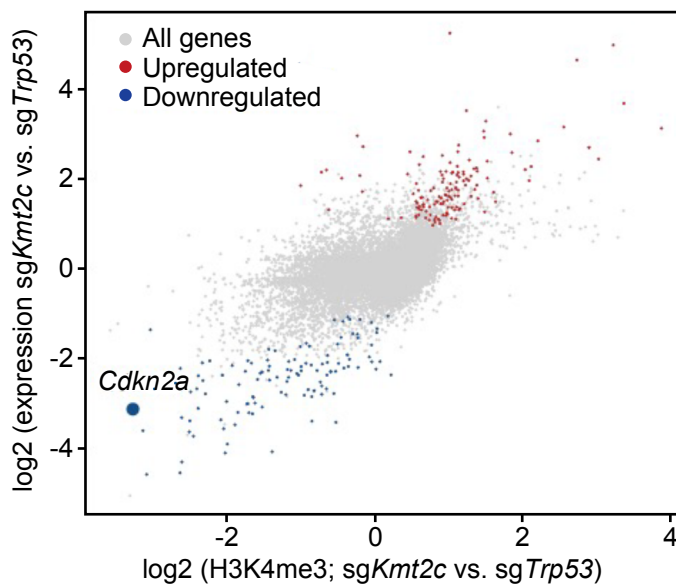**E**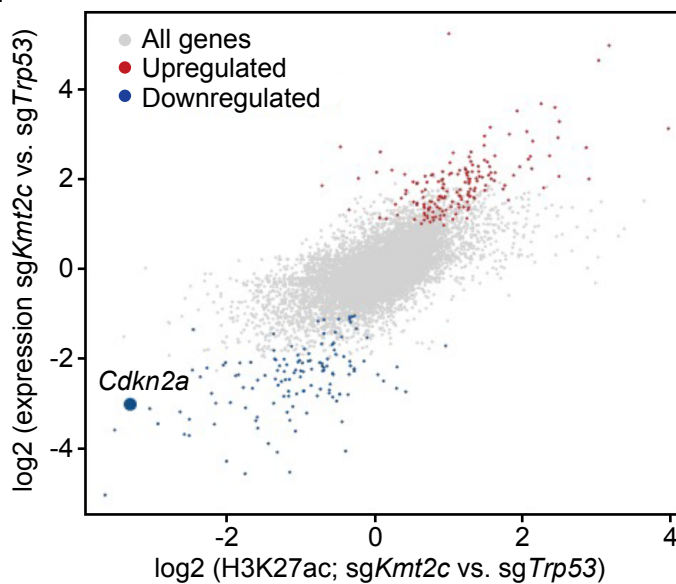

Supplement: supp [file elife-80854-supp-v1.zip]

A

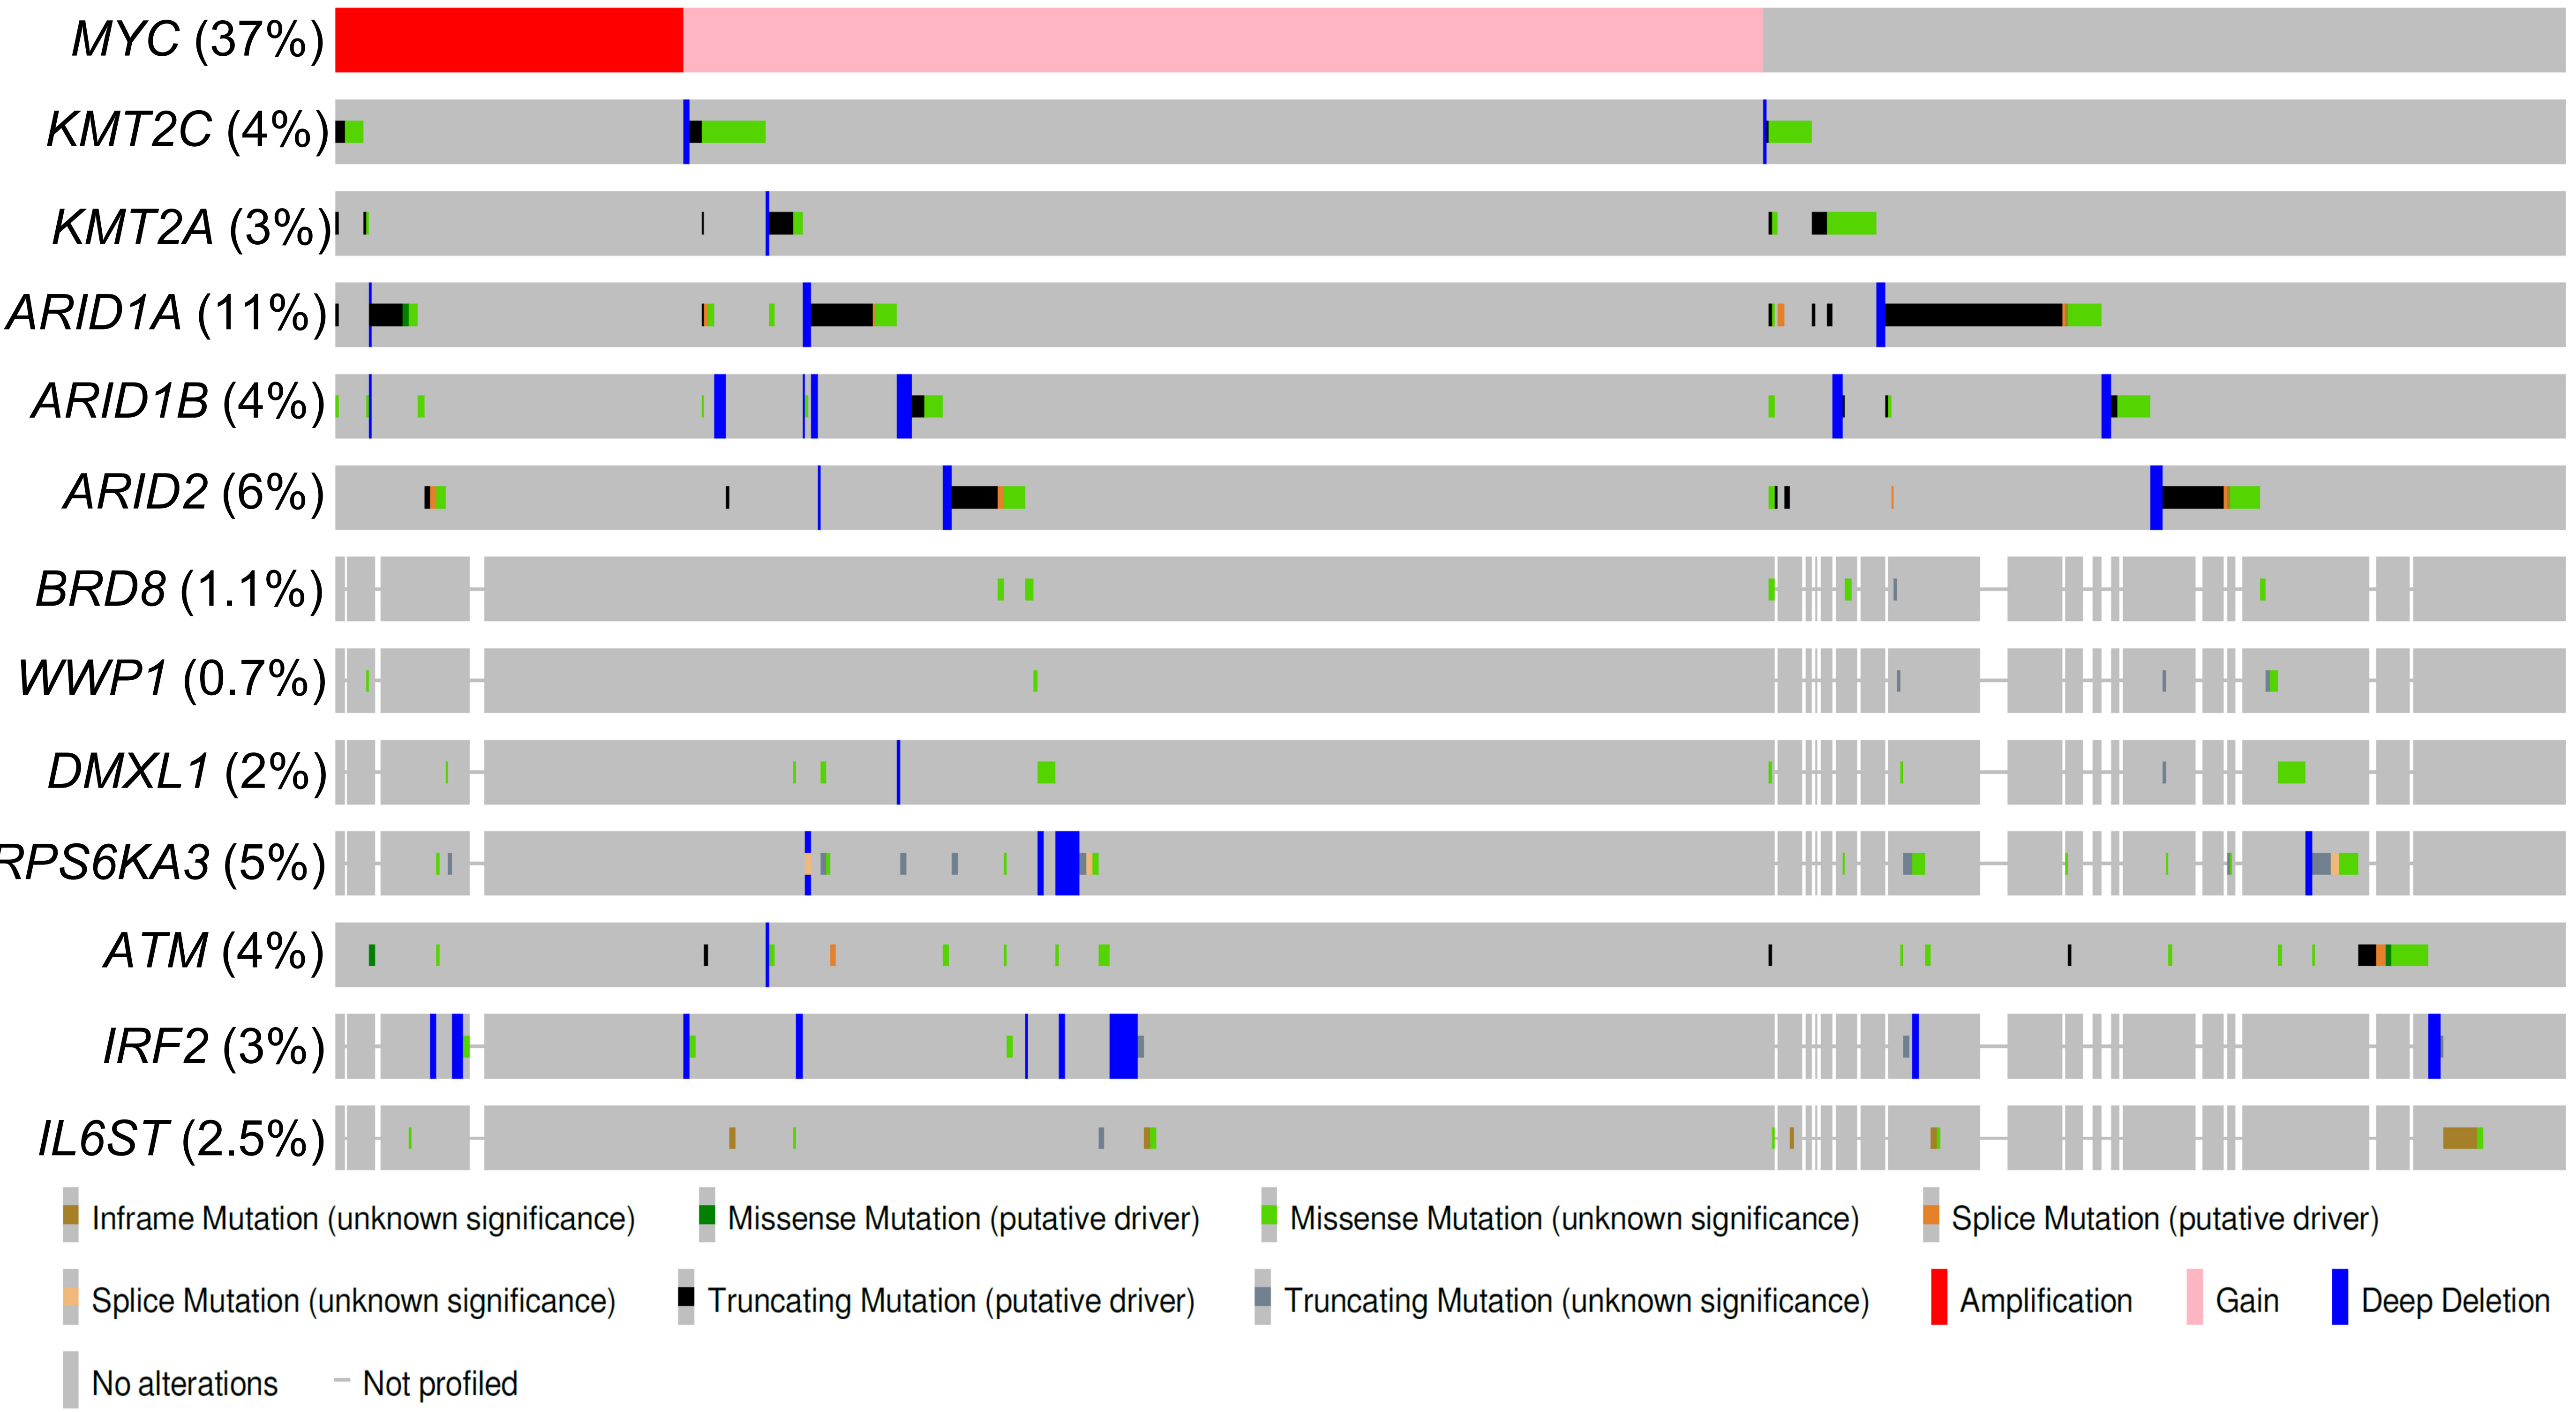

B

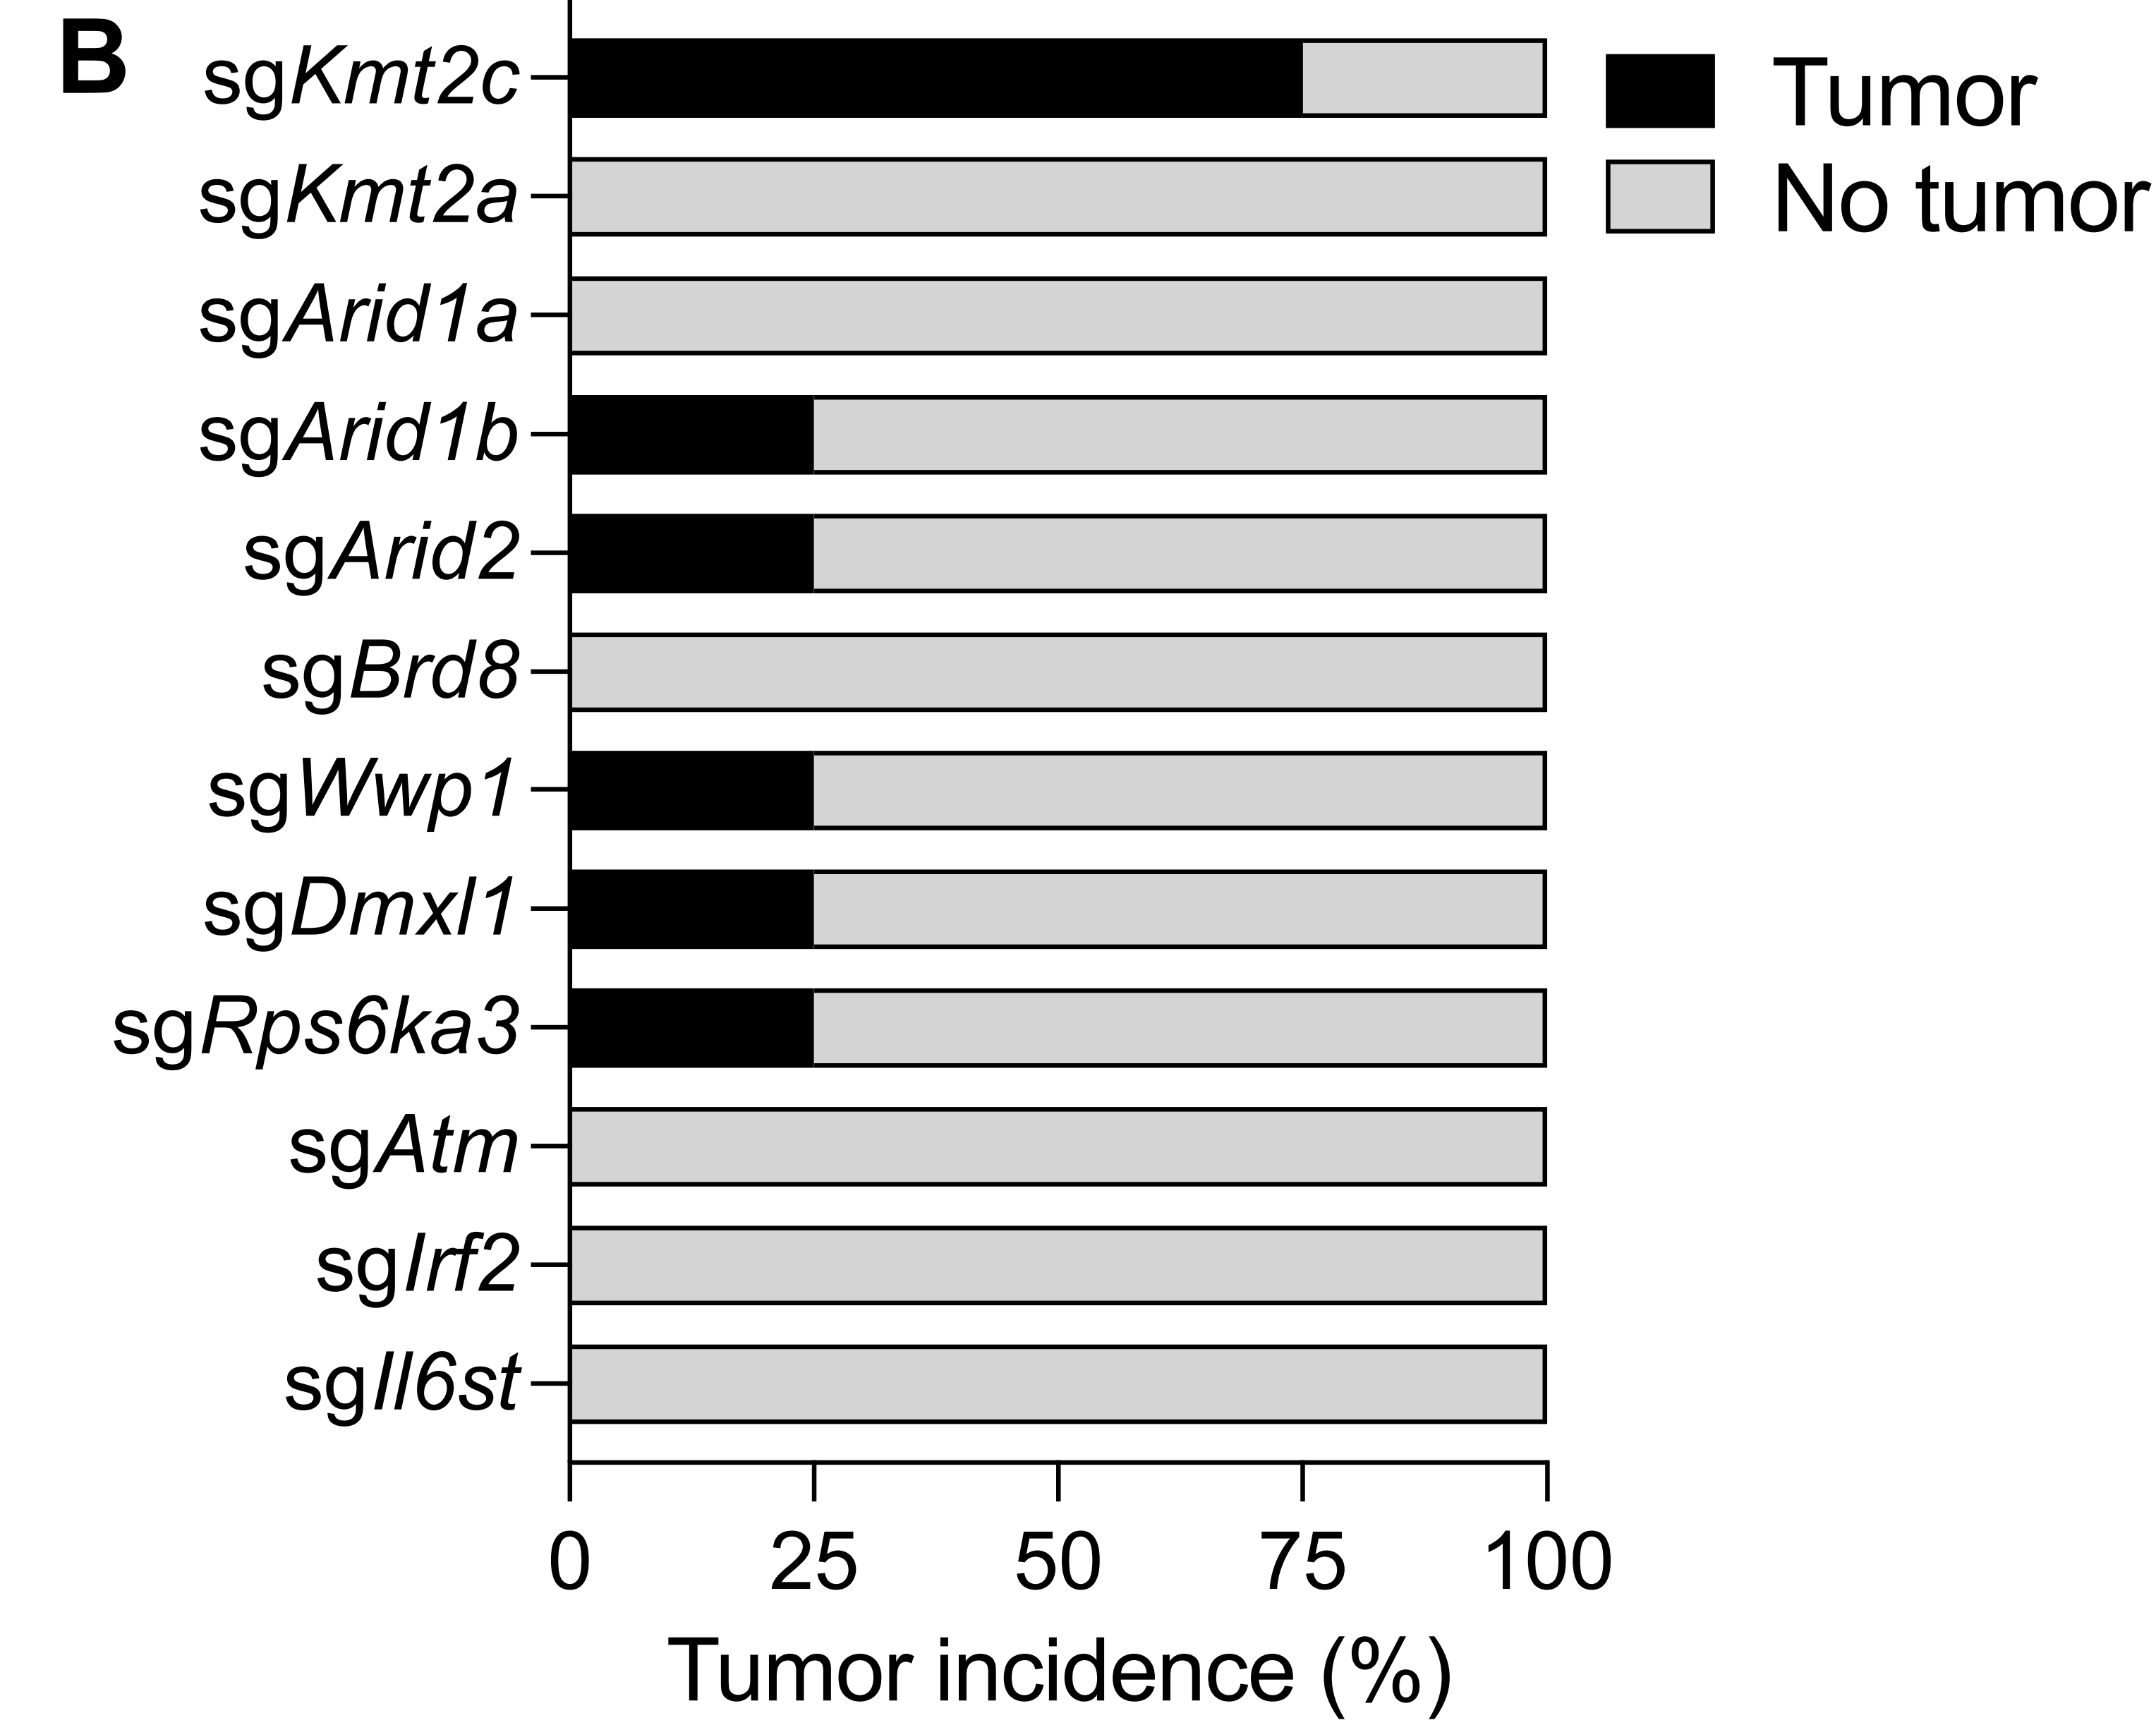

Supplement: supp [file elife-80854-supp-v1.zip]

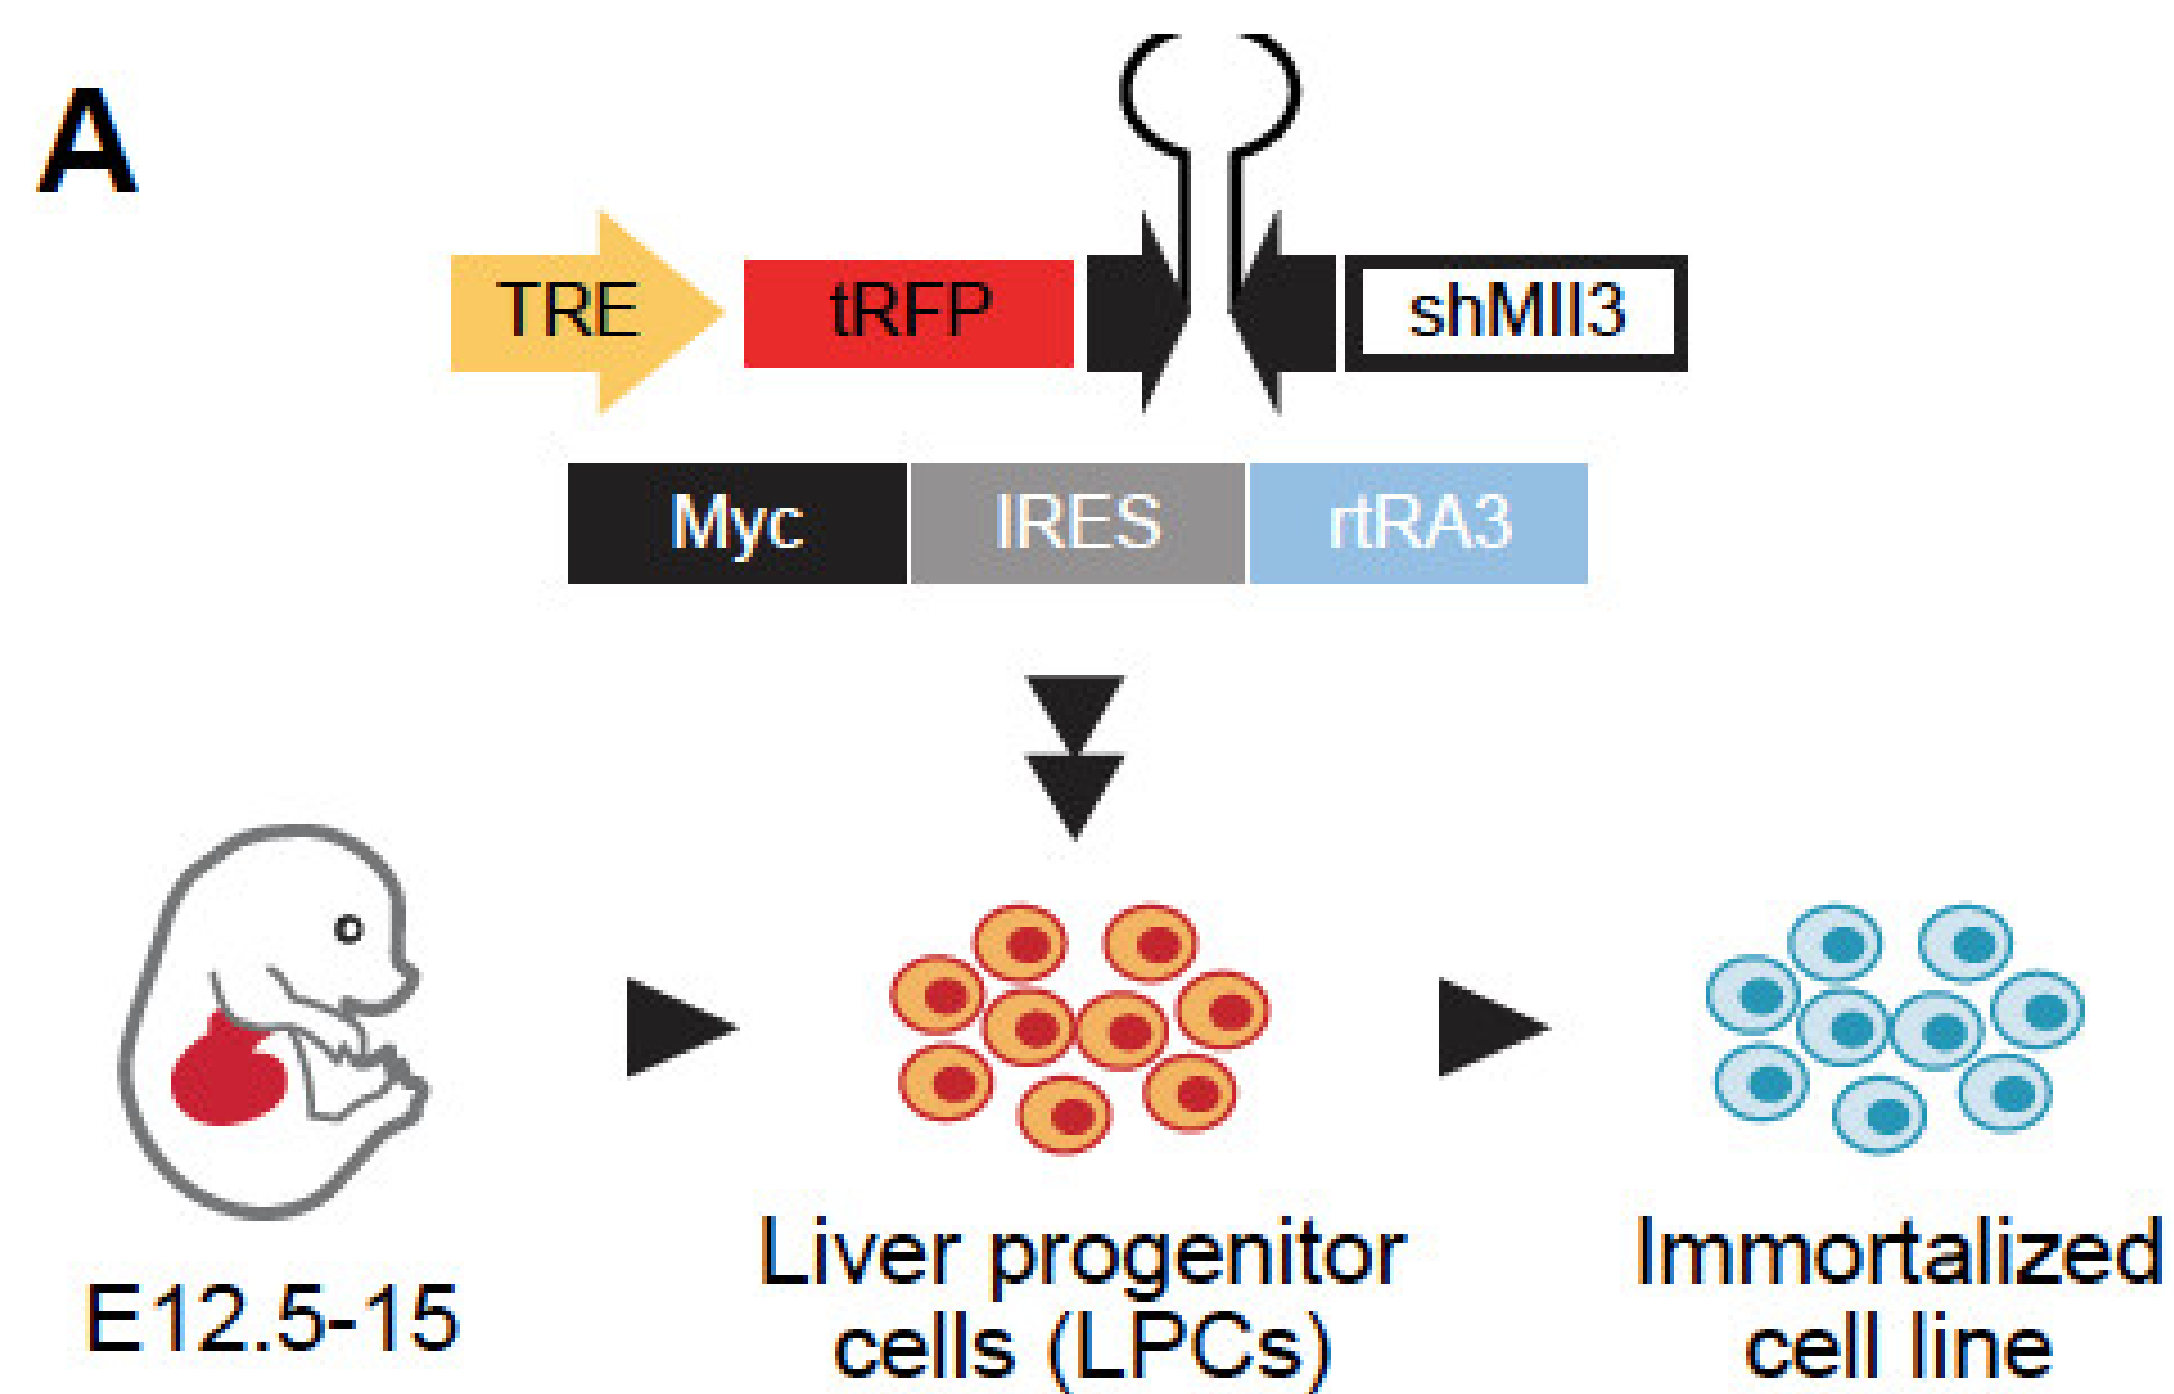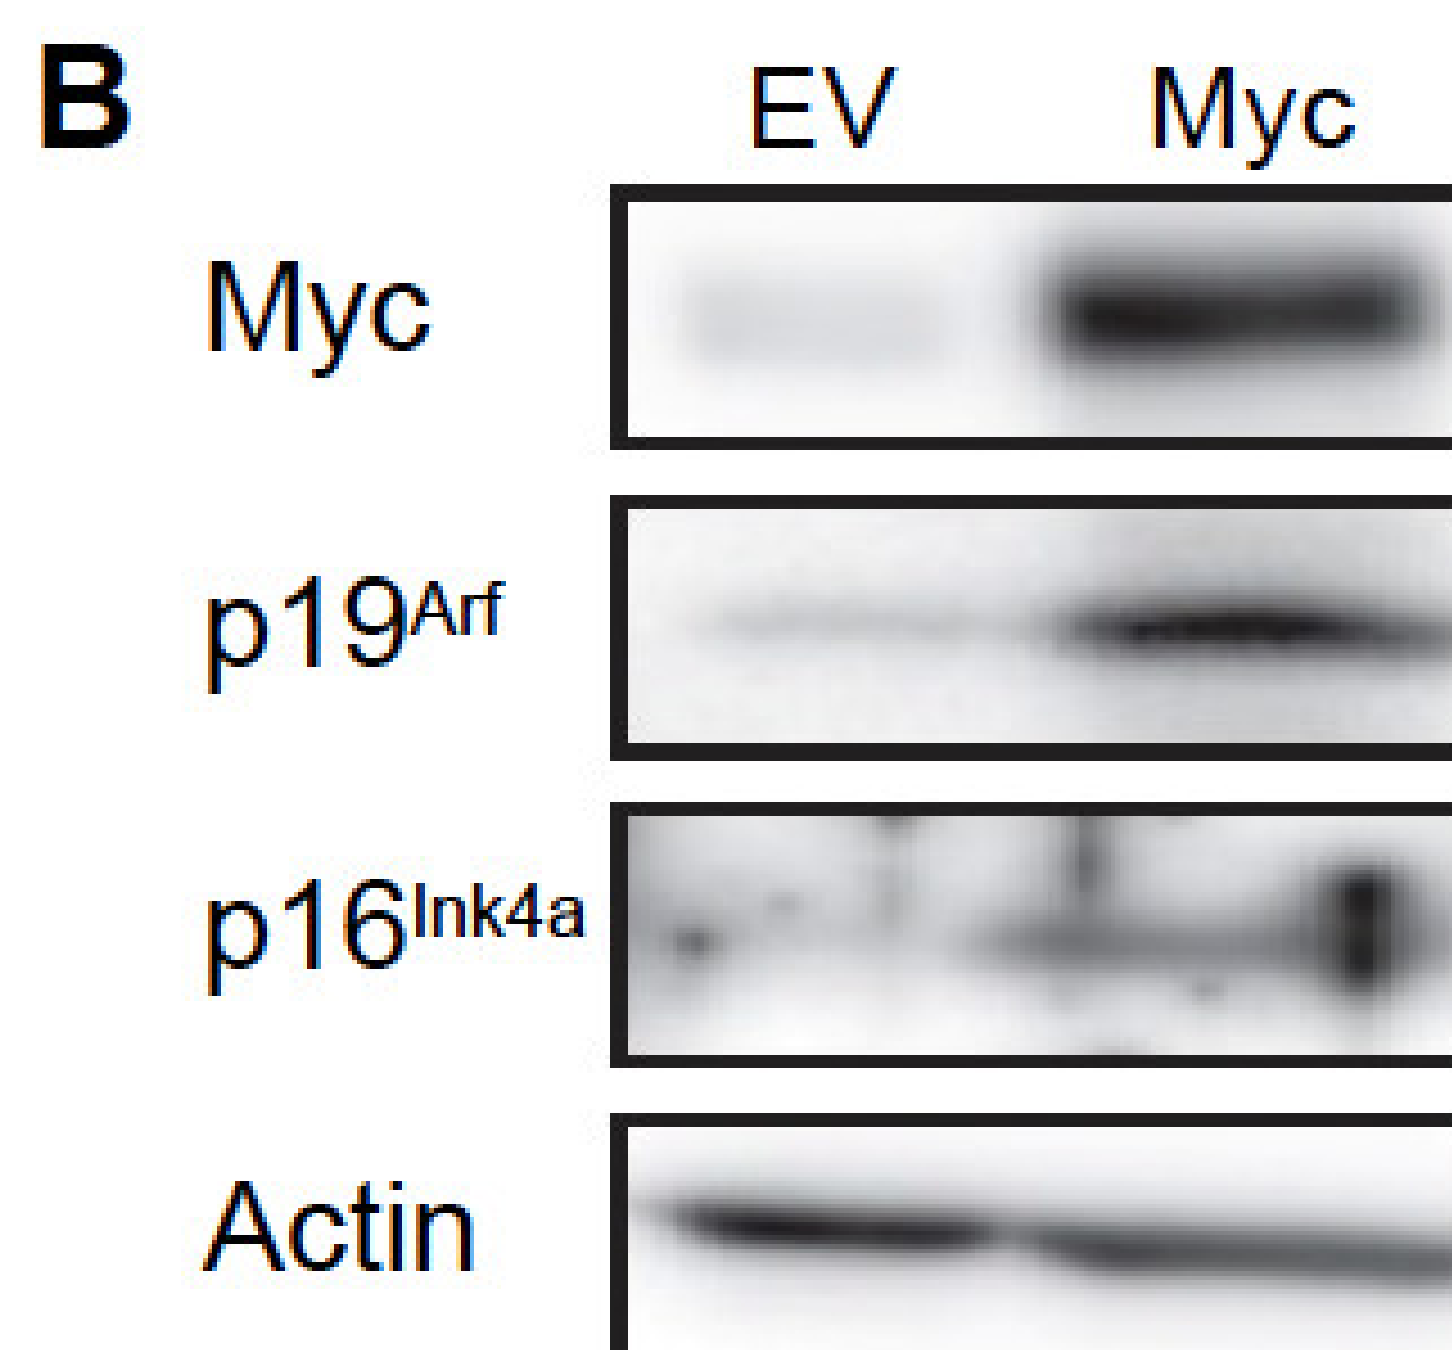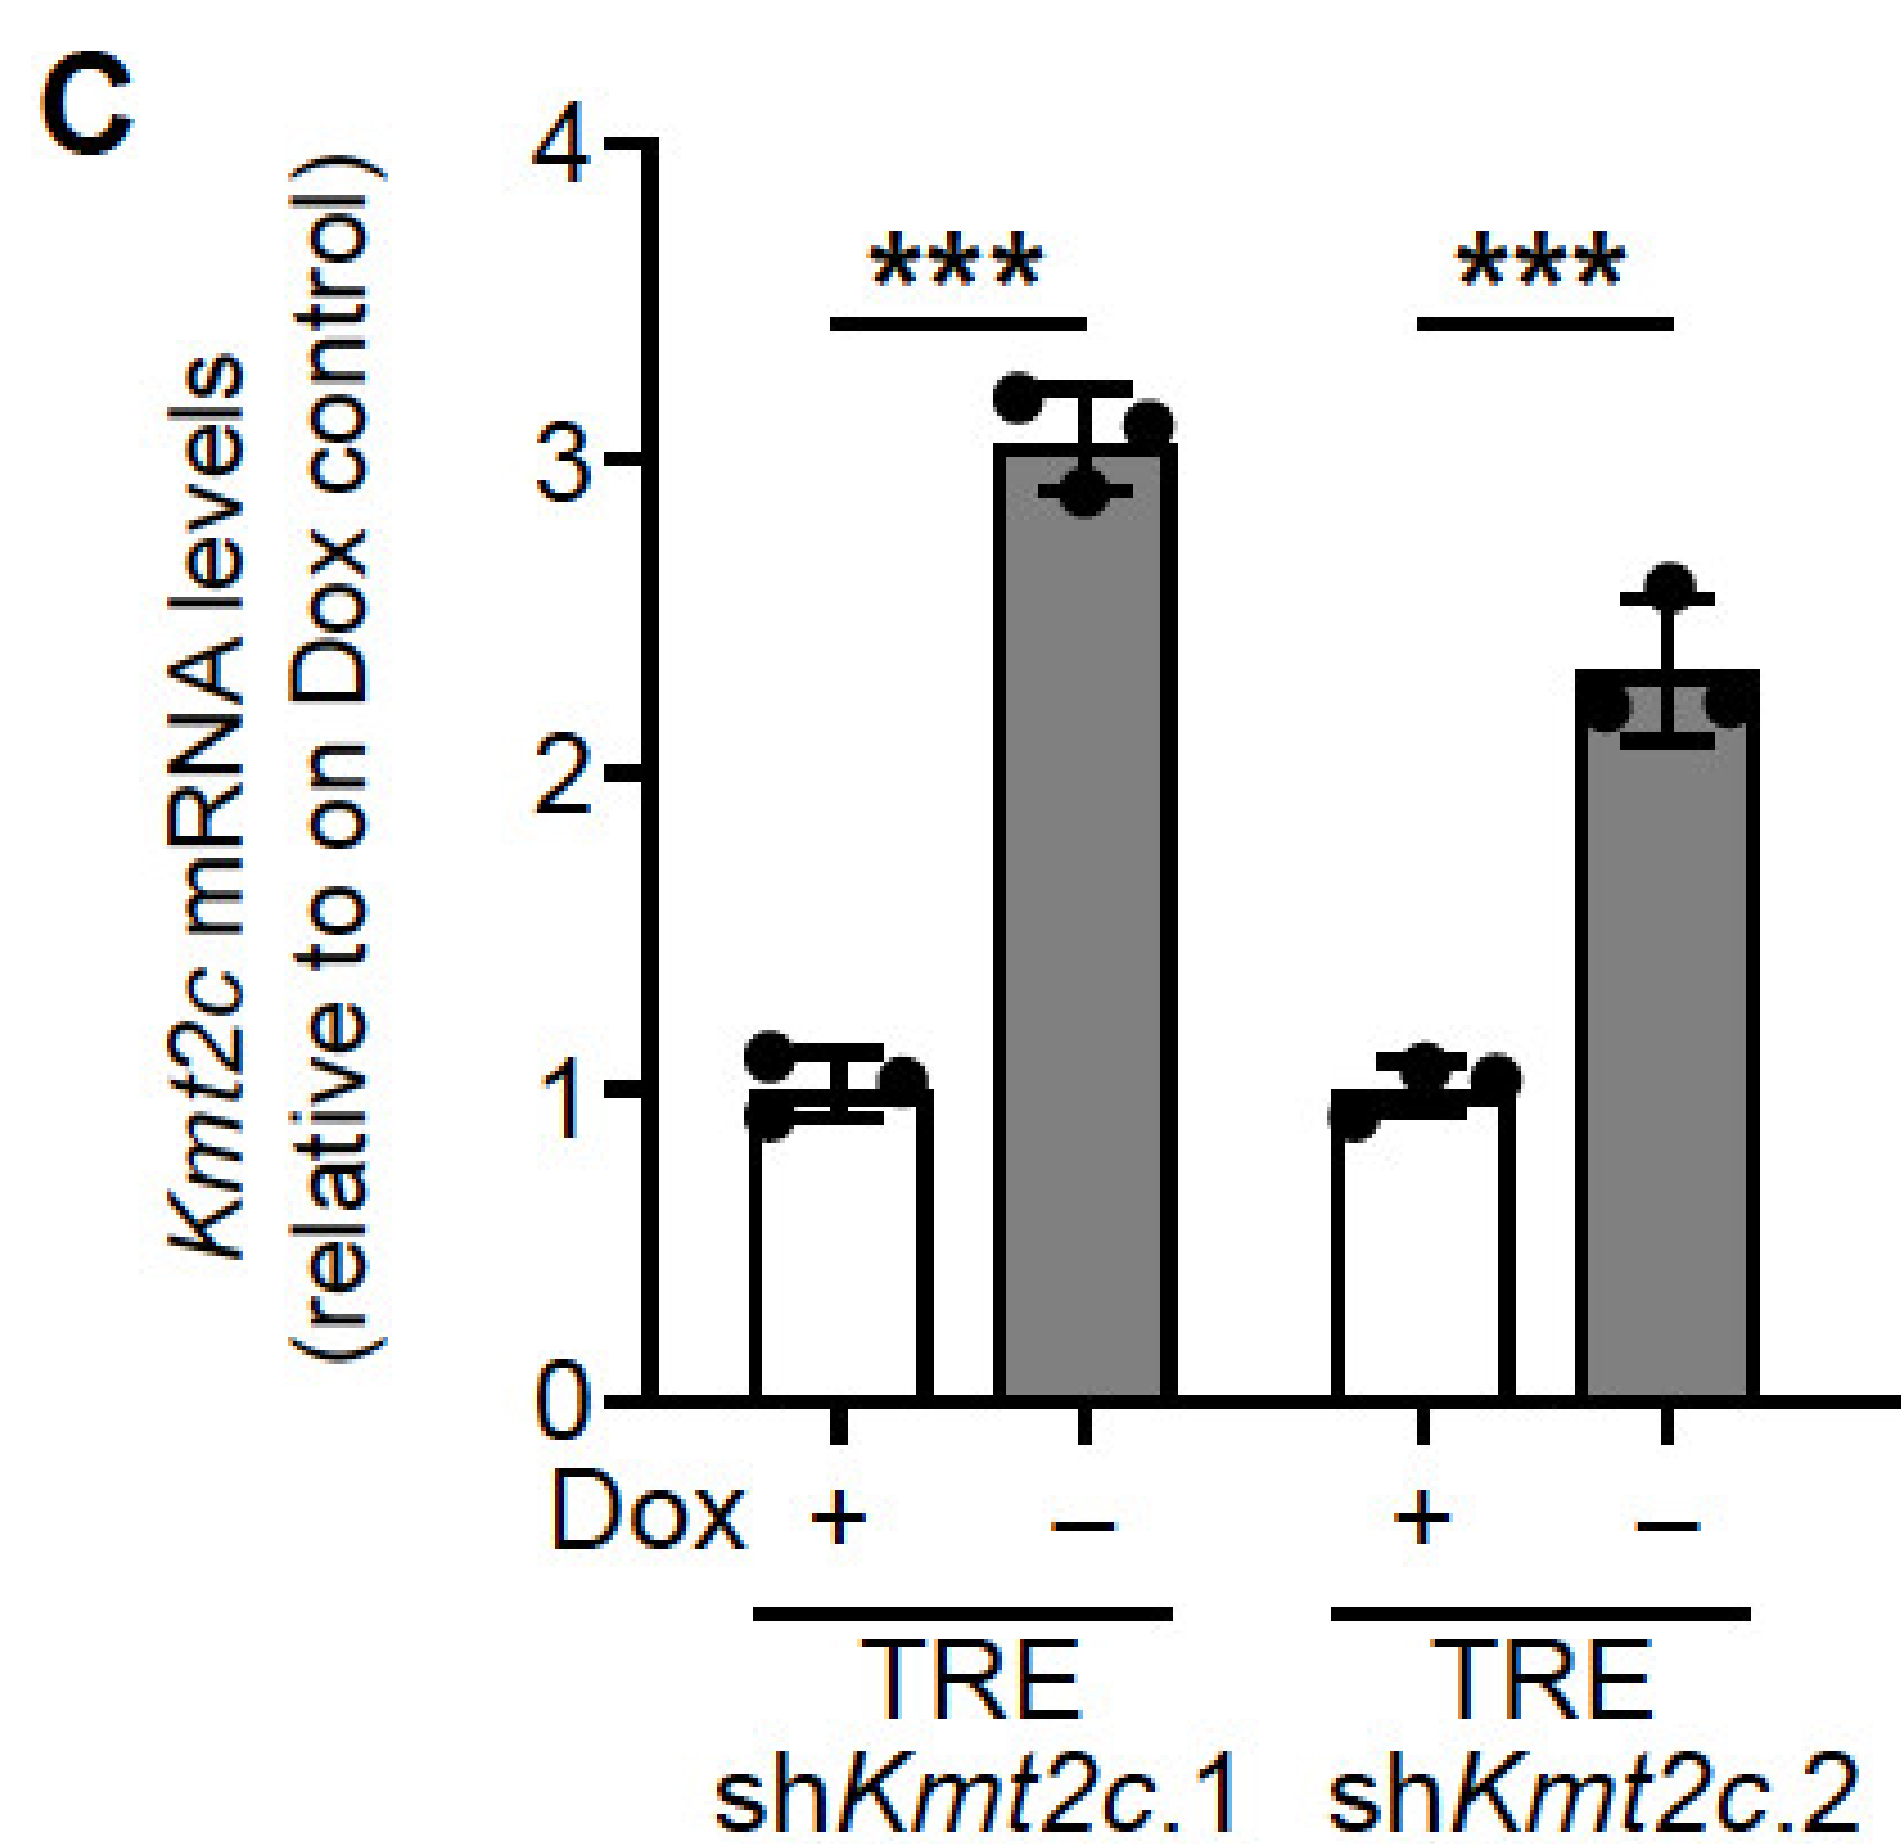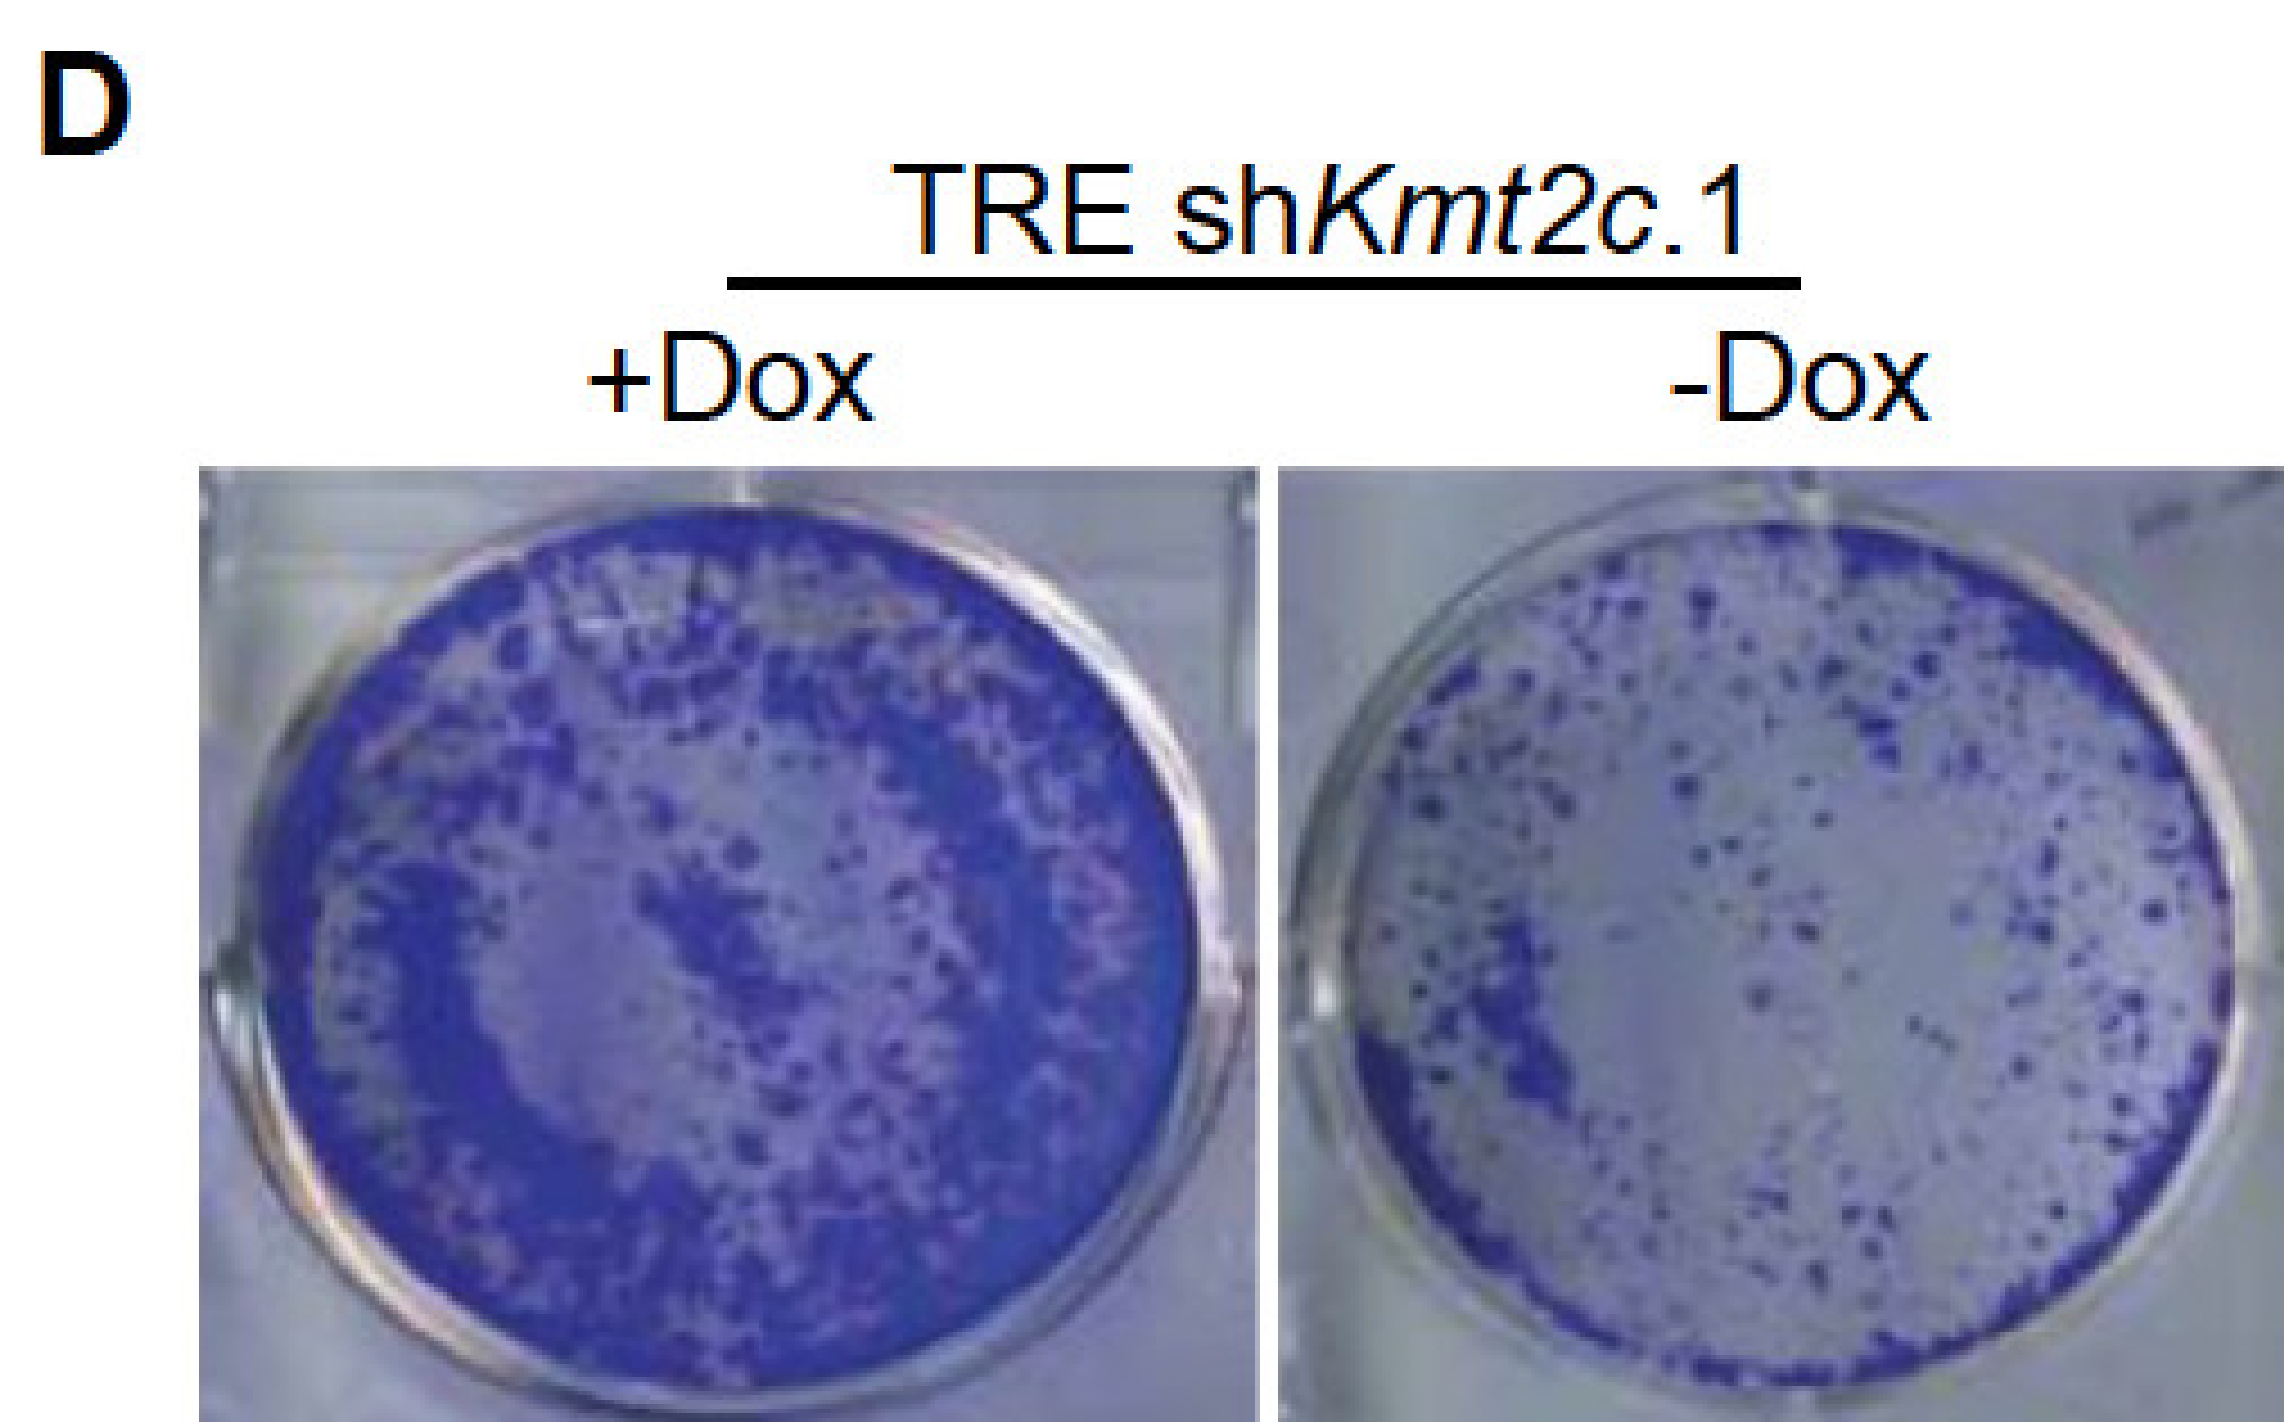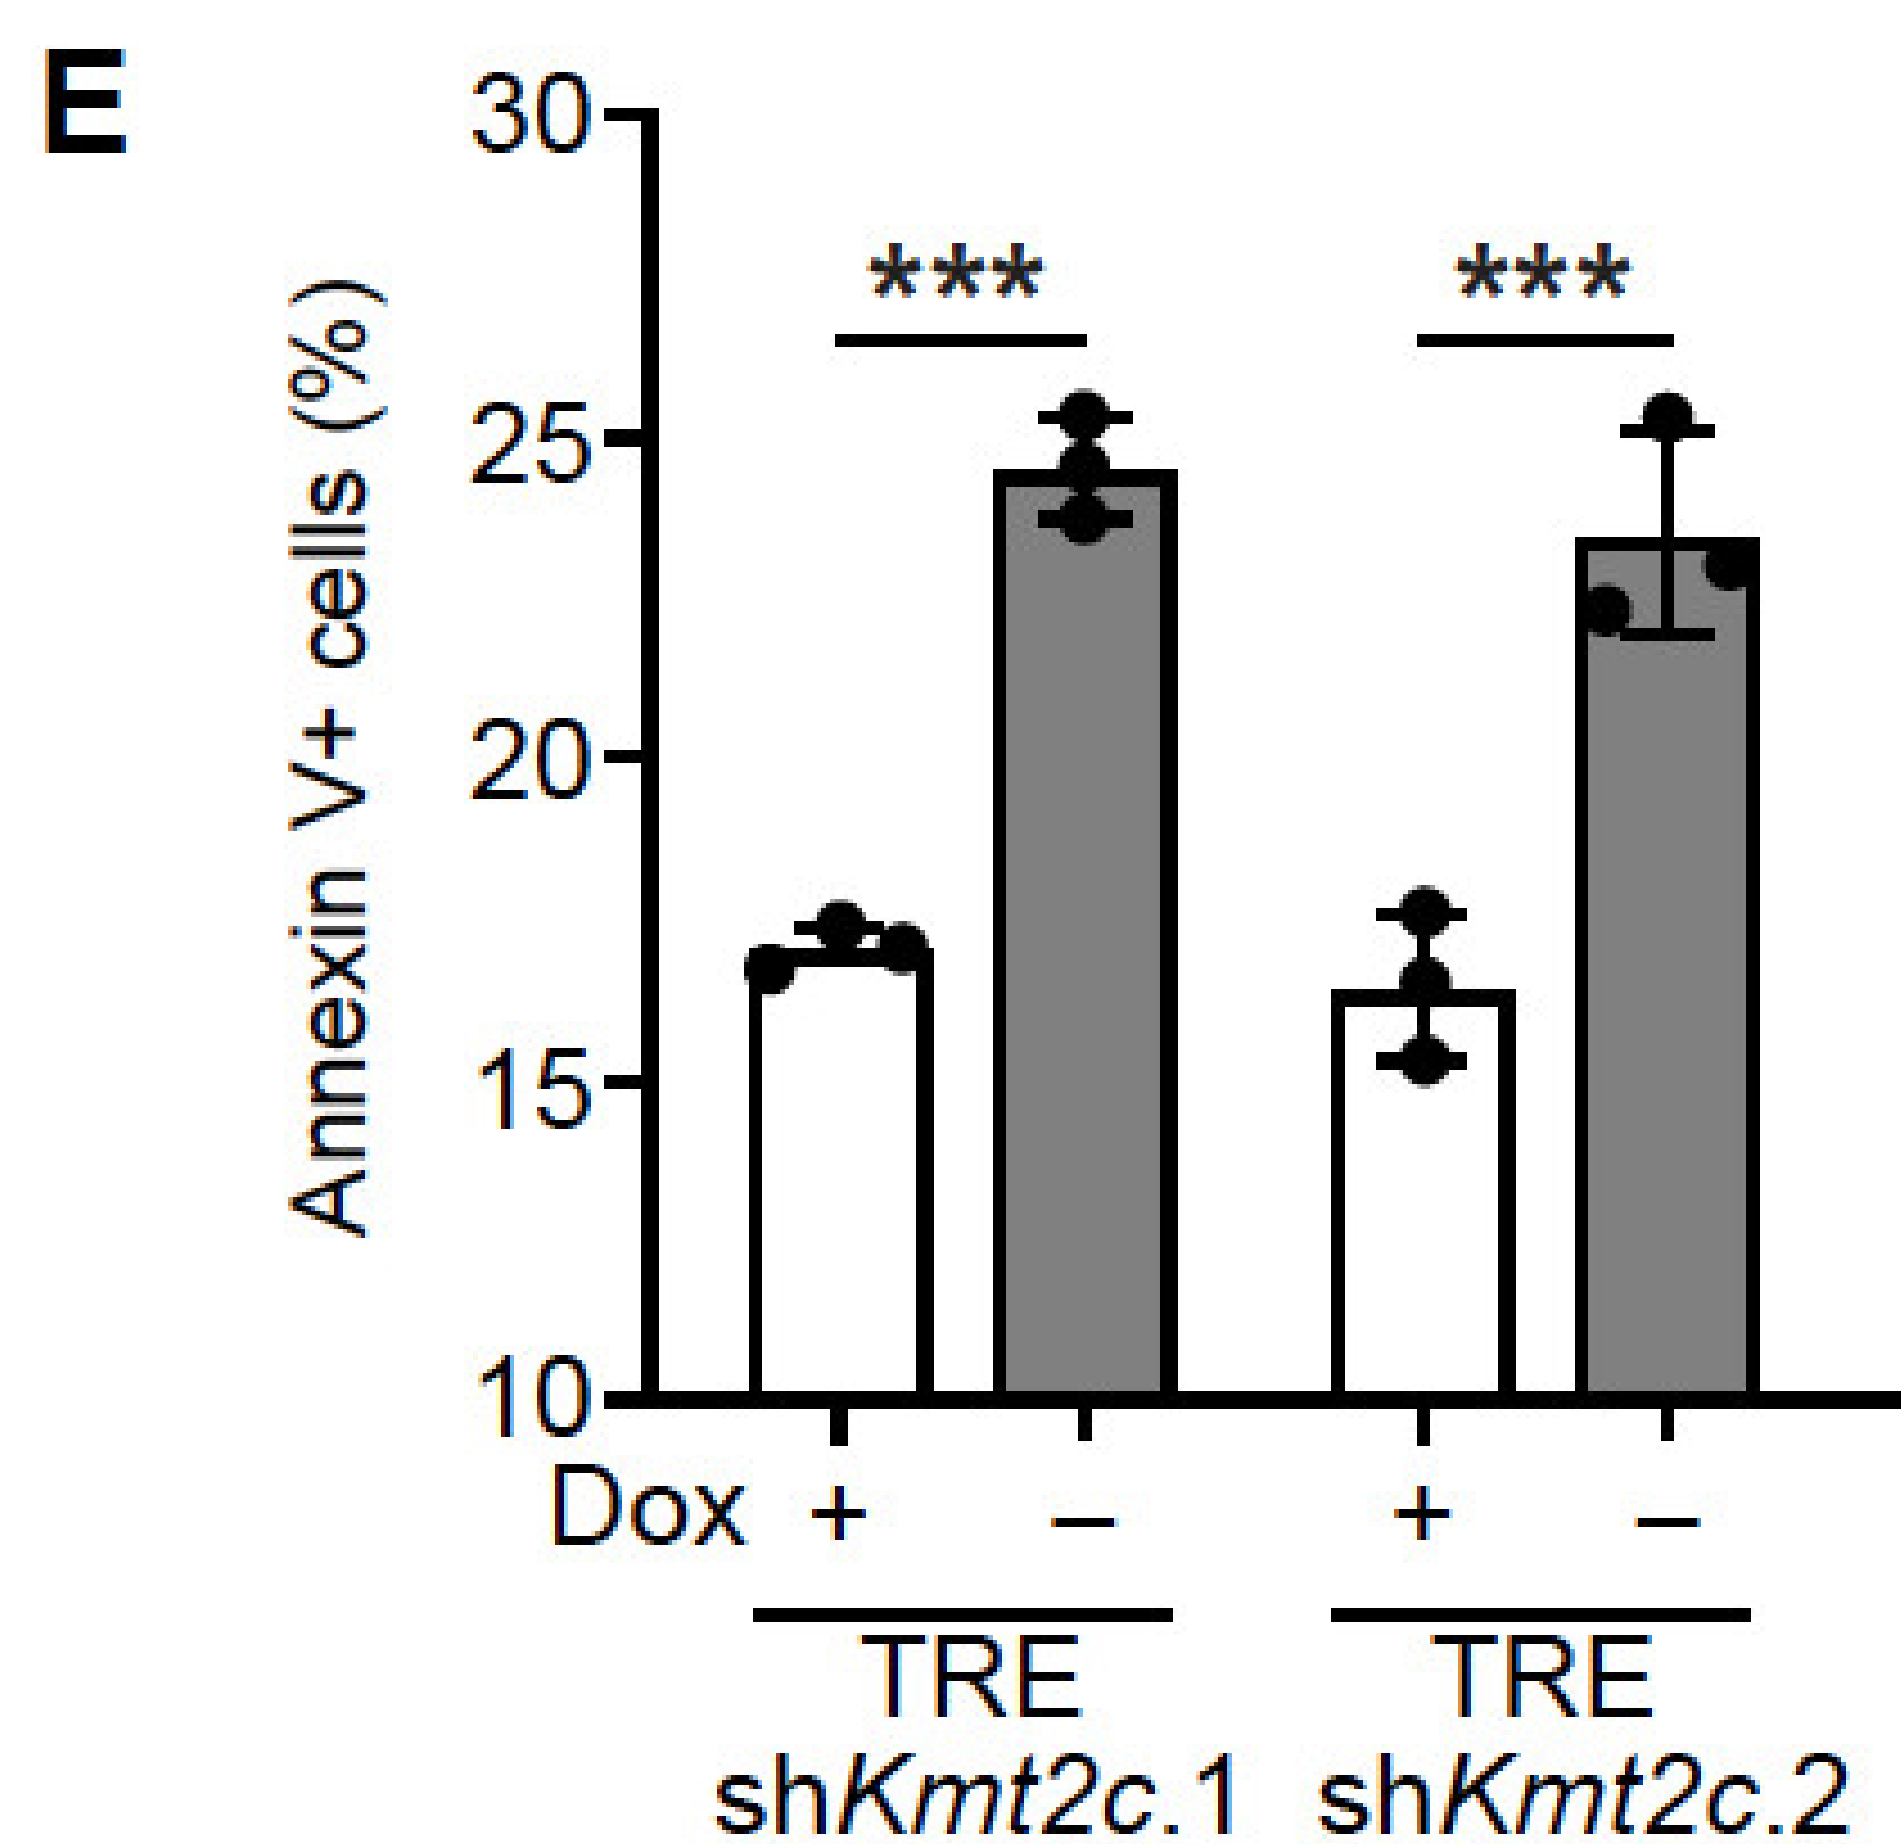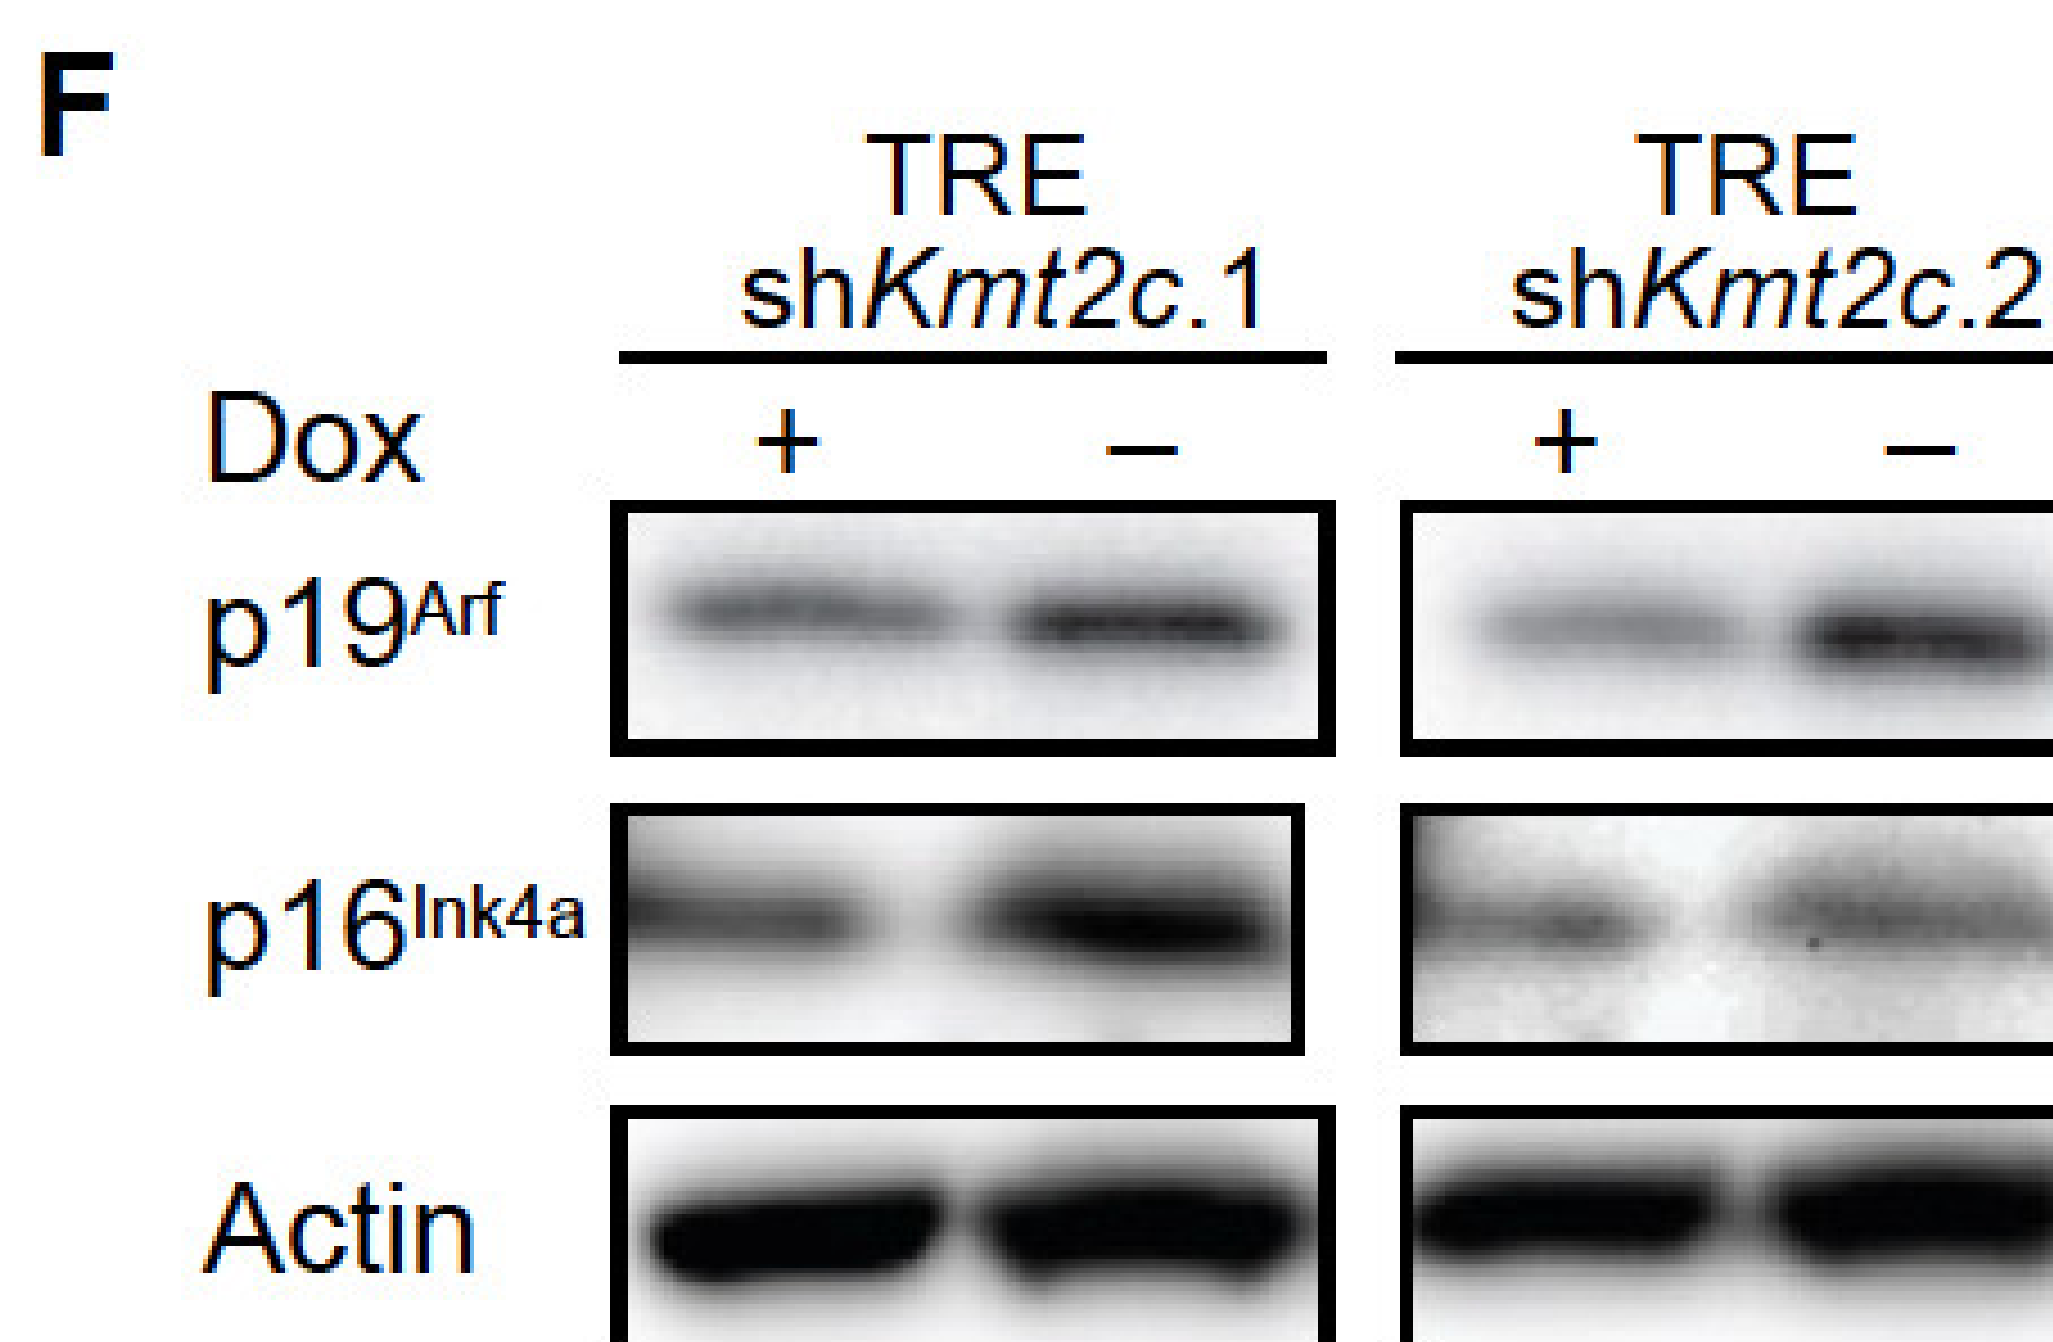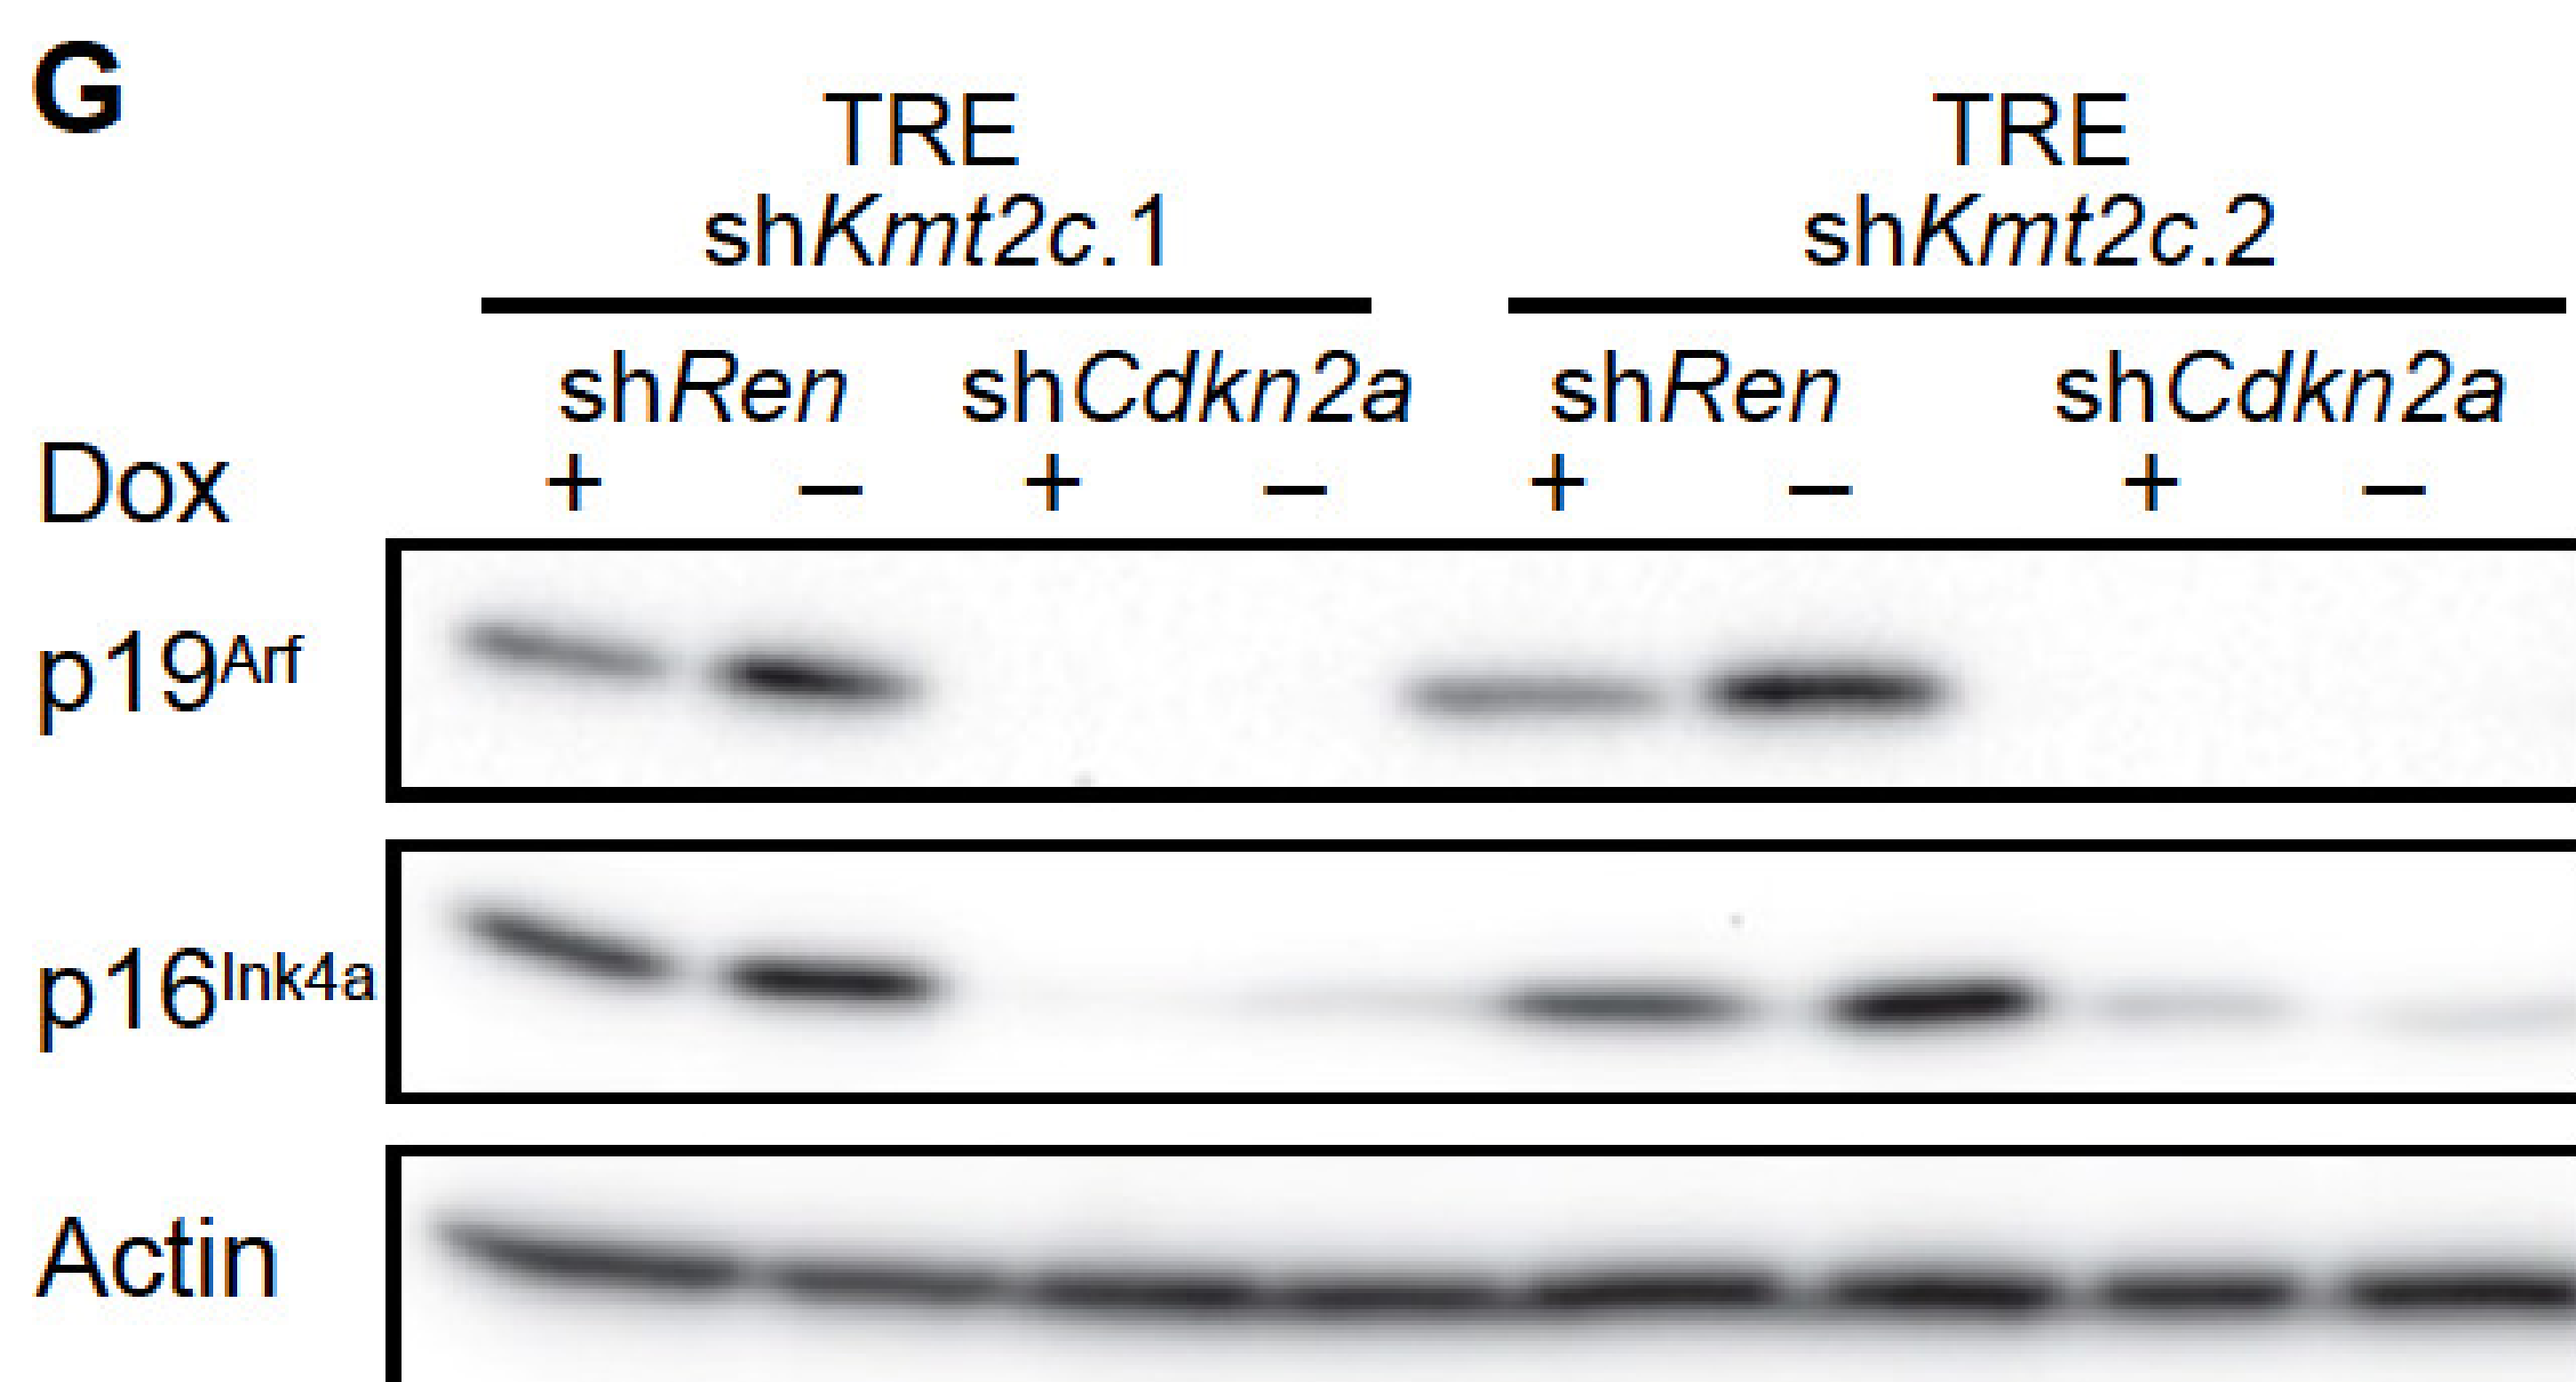

Supplement: supp [file elife-80854-supp-v1.zip]
